# Supplementary material for: Preparation of Oxysterols by C–H Oxidation of Dibromocholestane with Ru(Bpga) Catalyst
Source: MDPI journal article supplement (doi:10.3390/molecules27010225), 2021-12-30
Supplement: s1 [file s1]

## Supporting Information

# Preparation of Oxysterols by C-H Oxidation of Dibromocholestane with Ru(bpga) Catalyst

Yui Fujii <sup>1</sup>, Makoto Yoritate <sup>1</sup>, Kana Makino <sup>1</sup>, Kazunobu Igawa <sup>2</sup>, Daiki Takeda <sup>1</sup>, Daiki

Doiuchi <sup>3</sup>, Katsuhiko Tomooka <sup>2</sup>, Tatsuya Uchida <sup>3</sup>, and Go Hirai <sup>1,\*</sup>

<sup>1</sup> Graduate School of Pharmaceutical Sciences, Kyushu University, 3-1-1 Maidashi, Higashi-ku, Fukuoka 812-8582, Japan; gohirai@phar.kyushu-u.ac.jp

<sup>2</sup> Institute for Materials Chemistry and Engineering, IRCCS, Kyushu University, Kasuga, Fukuoka 816-8580, Japan

<sup>3</sup> Department of Chemistry, Graduate School of Science, Kyushu University, 744 Motoooka, Nishi-ku, Fukuoka 819-0395, Japan

\* Correspondence: gohirai@phar.kyushu-u.ac.jp

## Table of Contents

|                                                     |         |
|-----------------------------------------------------|---------|
| 1. General Remarks                                  | S2      |
| 2. Experimental Procedure                           |         |
| 2-1: Preparation and oxidation of 3-Ac-cholesterols | S3~S5   |
| 2-2: Preparation and oxidation of 3-Bz-cholesterols | S6~S17  |
| 2-3: Deprotection of 3-Bz-cholesterols              | S18~S20 |
| 3. NMR Spectra                                      | S21~S51 |

## 1. General Remarks

### Experiment and Reagents;

**Chemistry:** In general, reactions were carried out under a nitrogen atmosphere, unless noted otherwise. Reagent grade solvents (pyridine) was distilled prior to use. Reactions were monitored by thin layer chromatography using Merck Silica Gel 60 F254 plates. Flash chromatography was performed using flash silica gel 60N (spherical neutral, particle size 40–50  $\mu\text{m}$ ) purchased from Kanto Chemical Co. Ltd., unless noted otherwise. Zn powder was purchased from TCI, cat. No. Z0015. White's catalyst  $[\text{Fe}(\text{S,S-PDP})(\text{MeCN})_2][\text{SbF}_6]_2$ ; S,S-PDP = (2*S*,2'*S*)-1,1'-bis(pyridin-2-ylmethyl)-2,2'-bipyrrolidine) was prepared according to the reported method; White, M. C. *et al.*, *Science* **2007**, 318, 783-787.  $[\text{RuCl}(\text{bpga})(\text{PPh}_3)]\text{Cl}$  complex (bpga = 2-(bis(pyridin-2-ylmethyl)amino)-*N*-(2,6-dimethylphenyl)acetamide) was prepared according to our previously reported method; Uchida, T. *et al.*, *Chem. Asian J.* **2020**, 15, 762-765.

### Instrumentation;

**Chemistry:** NMR spectra were recorded 500 MHz Bruker Advance III, operating at 500 MHz for  $^1\text{H}$  NMR, and 126 MHz for  $^{13}\text{C}$  NMR. Chemical shifts were reported in the scale relative to  $\text{CHCl}_3$  ( $\delta$  7.26 ppm for  $^1\text{H}$  NMR,  $\delta$  77.16 ppm for  $^{13}\text{C}$  NMR) as an internal reference. Splitting patterns are designated as s: singlet, d: doublet, t: triplet, br: broad, and m: multiplet. High-resolution electron spray ionization ESI-MS was obtained with Bruker MicrOTOF II. HPLC analysis was performed on HITACHI HPLC system consisting of the followings: pump, L6250; detector, L-3350 RI monitor; column, Senshu-Pak PEGASIL silica SP100; mobile phase, hexane/ethyl acetate, and JASCO HPLC system consisting of the followings: pump, PU-2087; detector, UV-2070 UVdetector; column, Senshu-Pak PEGASIL silica SP100; mobile phase, hexane/EtOAc.

## 2. Experimental Procedure

### 2-1: Preparation and oxidation of 3-Ac-cholesterol

#### Compound 1-Ac

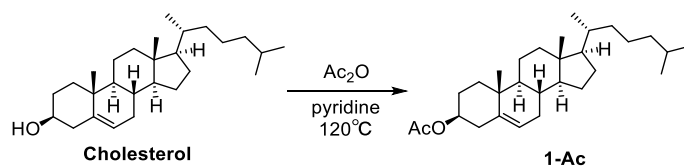

To a solution of cholesterol (3.01 g, 7.76 mmol, 1.0 equiv.) in pyridine (45 mL, 0.17 M) was added  $\text{Ac}_2\text{O}$  (33 mL, 351 mmol, 45 equiv.) at room temperature. The mixture was stirred for 2 h at 120 °C, turning the color of solution from colorless to brown. The mixture was quenched with  $\text{NaHCO}_3$  at 0 °C and extracted with hexane (3 x 30 mL). The combined organic layers were washed with aqueous saturated  $\text{NaHCO}_3$  and the separated water layer was extracted with hexane. The combined organic layers were dried over  $\text{Na}_2\text{SO}_4$ , filtered, and concentrated. The residue was purified by silica gel column chromatography (eluent: hexane/EtOAc 50/1 to 9/1) to give **1-Ac** (3.11 g, 7.26 mmol, 94%) as a white solid.

**$^1\text{H}$  NMR (500 MHz,  $\text{CDCl}_3$ ):**  $\delta$  5.37 (d,  $J$  = 4.9 Hz, 1H), 4.63–4.57 (m, 1H), 2.32 (d,  $J$  = 7.0 Hz, 2H), 2.03 (s, 3H), 2.01–1.94 (m, 2H), 1.88–1.79 (m, 3H), 1.62–1.54 (m, 8H), 1.53–1.43 (m, 3H), 1.42–1.04 (m, 8H), 1.02 (s, 3H), 1.01–0.94 (m, 3H), 0.91 (d,  $J$  = 6.4 Hz, 3H), 0.86 (dd,  $J$  = 6.7, 2.1 Hz, 6H), 0.68 (s, 3H)

#### Compound 2-Ac and 3-Ac

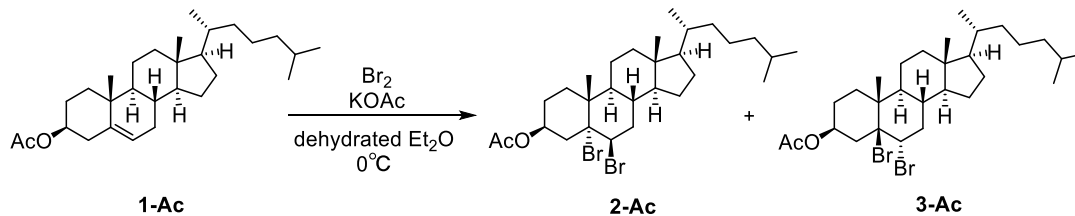

To a solution of **1-Ac** (3.05 g, 7.11 mmol, 1.0 equiv.) in anhydrous  $\text{Et}_2\text{O}$  (86 mL, 82.5 mM) was added a solution of KOAc (5.40 g, 55 mmol, 7.7 equiv.) in glacial acetic acid (54 mL) at 0°C, and then added a solution of  $\text{Br}_2$  (3.64 mL, 71.1 mmol, 10 equiv.) in glacial acetic acid (27 mL) at 0°C. After stirring for 3 h at 0°C, the reaction was allowed to warm to room temperature and stirred overnight. The resulting mixture was quenched with aqueous 1 M  $\text{Na}_2\text{S}_2\text{O}_3$  at room temperature and extracted with diethyl ether (3 x 30 mL). The combined organic layer was washed with aqueous 1 M  $\text{Na}_2\text{S}_2\text{O}_3$  (30 mL), followed by aqueous 1 M  $\text{K}_2\text{CO}_3$  (150 mL), dried over  $\text{Na}_2\text{SO}_4$ , filtered, and concentrated. The residue was purified by MPLC (Yamazen, Ultrapack 40D eluent: hexane/EtOAc 100/0 to 84/16) to give dibromide **2-Ac** (3.00 g, 5.1 mmol, 72%) and the isomer **3-Ac** (573 mg, 1.0 mmol, 14%).

#### Compound 2-Ac:

**$^1\text{H}$  NMR (500 MHz,  $\text{CDCl}_3$ ):**  $\delta$  5.54–5.47 (m, 1H), 4.85 (q,  $J$  = 2.1 Hz, 1H), 2.72–2.66 (m, 1H), 2.61 (dd,  $J$  = 14.0, 10.4 Hz, 1H), 2.29 (ddd,  $J$  = 14.0, 5.5, 1.5 Hz, 1H), 2.07 (s, 3H), 2.10–1.83 (m, 5H), 1.79–1.59 (m, 5H), 1.57–1.52 (m, 1H), 1.49 (s, 3H), 1.47–1.08 (m, 13H), 1.02 (q,  $J$  = 9.1 Hz, 1H), 0.93 (d,  $J$  = 6.7 Hz, 3H), 0.91–0.88 (dd,  $J$  = 6.4, 2.4 Hz, 6H), 0.73 (s, 3H).

**$^{13}\text{C}$  NMR (126 MHz,  $\text{CDCl}_3$ ):**  $\delta$  170.5, 88.3, 72.2, 56.3, 56.3, 55.3, 47.4, 42.8, 42.1, 42.0, 39.7, 39.7, 37.4, 36.6, 36.3, 35.9, 31.0, 28.3, 28.2, 26.3, 24.2, 24.0, 23.0, 22.7, 21.5, 21.4, 20.3, 18.8, 12.4.

Compound **3-Ac**:

**<sup>1</sup>H NMR (500 MHz, CDCl<sub>3</sub>)**: δ 5.14 (s, 1H), 4.86 (dd, *J* = 12.7, 5.0 Hz, 1H), 2.86 (d, *J* = 16.8 Hz, 1H), 2.37 (dd, *J* = 16.8, 4.3 Hz, 1H), 2.25–2.20 (m, 1H), 2.06 (s, 3H), 2.12–2.04 (m, 1H), 2.00 (d, *J* = 12.8 Hz, 1H), 1.87–1.80 (m, 1H), 1.71–1.46 (m, 7H), 1.41–1.25 (m, 7H), 1.23 (s, 3H), 1.17–0.94 (m, 8H), 0.89–0.88 (m, 3H), 0.85 (dd, *J* = 6.7, 2.4 Hz, 6H), 0.64 (s, 3H).

**<sup>13</sup>C NMR (126 MHz, CDCl<sub>3</sub>)**: δ 170.6, 79.1, 67.8, 64.2, 56.0 (2C), 44.9, 42.6, 41.7, 41.6, 39.7, 39.5, 36.4, 36.2, 35.7, 34.4, 29.2, 28.2, 28.1, 24.2, 24.1, 23.9, 22.9, 22.6, 22.5, 21.8, 21.3, 18.7, 12.0.

### [Oxidation of compound **2-Ac** using Ru catalyst]

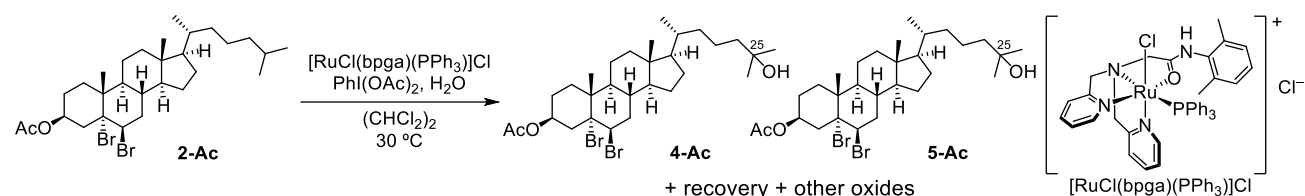

To a 10 mL screw-cap vial was added **2-Ac** (100 mg, 170  $\mu\text{mol}$ , 1.0 equiv.), iodobenzene diacetate (PIDA, 55 mg, 170  $\mu\text{mol}$ , 1.0 equiv.),  $\text{H}_2\text{O}$  (8.5  $\mu\text{L}$ ),  $(\text{CH}_2\text{Cl}_2)_2$  (430  $\mu\text{L}$ ), and a magnetic stir bar. The vial was placed on an aluminum block at  $30\text{ }^\circ\text{C}$ , added  $[\text{RuCl}(\text{bpg})(\text{PPh}_3)]\text{Cl}$  (2.7 mg, 3.4  $\mu\text{mol}$ , 2 mol%), and sealed with a screw cap. After stirring for 24 h, the suspended brown mixture was turned to be clear brown solution. Then PIDA (55 mg, 1.0 equiv.) was added to the mixture. After stirring for 48 h, the mixture was filtered through a pad of Celite<sup>®</sup> and concentrated. The residue was purified by silica gel column chromatography (eluent: hexane/EtOAc 50/1 to 1/2). The result of column chromatography is described below.

### <Isolation scheme>

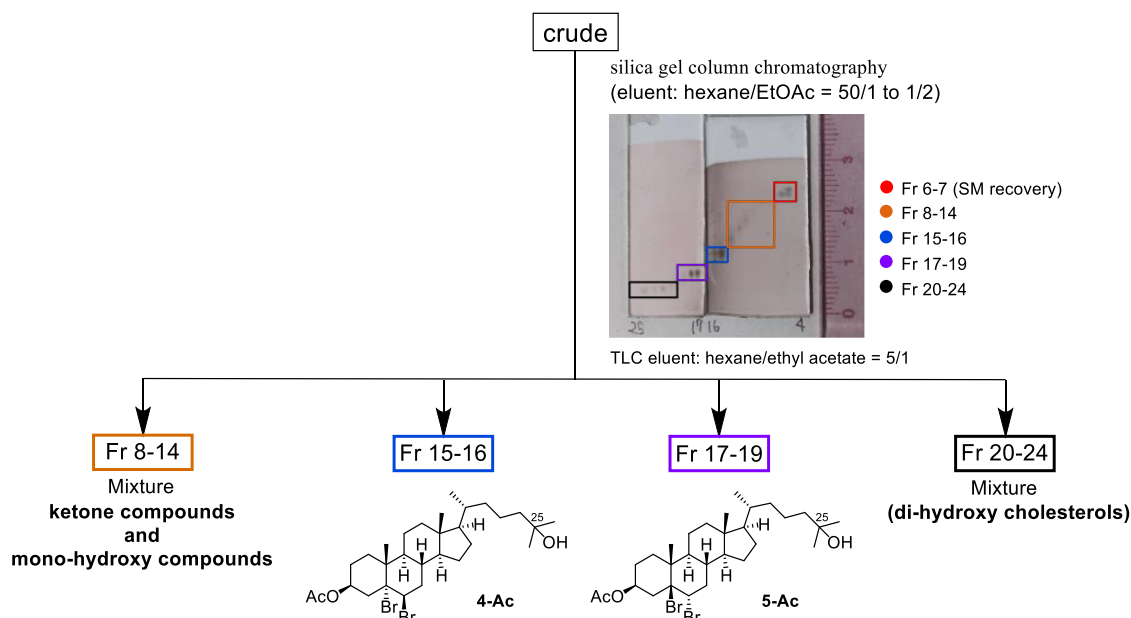

Figure S1. Purification of oxidized cholesterol (part 1)



Compound **4-Ac**:

**<sup>1</sup>H NMR (500 MHz, CDCl<sub>3</sub>)**: δ 5.51–5.45 (m, 1H), 4.83 (d, *J* = 2.4 Hz, 1H), 2.70–2.64 (m, 1H), 2.59 (dd, *J* = 13.9, 10.5 Hz, 1H), 2.27 (ddd, *J* = 14.2, 5.4, 1.5 Hz, 1H), 2.04 (s, 3H), 2.07–1.81 (m, 5H), 1.73–1.55 (m, 6H), 1.46 (s, 3H), 1.44–1.23 (m, 9H), 1.21 (s, 6H), 1.18–1.01 (m, 4H), 0.93 (d, *J* = 6.3 Hz, 3H), 0.88 (m, 1H), 0.71 (s, 3H).

Compound **5-Ac**:

**<sup>1</sup>H NMR (500 MHz, CDCl<sub>3</sub>)**: δ 5.15 (brs, 1H), 4.86 (dd, *J* = 12.7, 4.9 Hz, 1H), 2.86 (brd, *J* = 17.1 Hz, 1H), 2.37 (dd, *J* = 17.1, 4.4 Hz, 1H), 2.23 (ddd, *J* = 13.2, 5.4, 3.9 Hz, 1H), 2.11 (dd, *J* = 14.2, 4.4 Hz, 1H), 2.07 (s, 3H), 2.01 (m, 1H), 1.87–1.81 (m, 1H), 1.71–1.27 (m, 21H), 1.24 (s, 3H), 1.21 (s, 6H), 1.18–1.02 (m, 6H), 0.91 (d, *J* = 6.3 Hz, 3H), 0.89–0.85 (m, 1H), 0.65 (s, 3H)

### [Debromination using Zinc Powder]

**General Procedure A**: To a solution of oxidized cholesterol (1.0 equiv.) and AcOH (3.6 equiv.) in Et<sub>2</sub>O (56 mM) was added activated zinc powder (9 equiv.) After stirring vigorously for 4.5 h at room temperature, the mixture was filtered through a pad of Celite<sup>®</sup> and washed with saturated aqueous NaHCO<sub>3</sub> and the separated water layer was extracted with Et<sub>2</sub>O (3 x 20 mL). The combined organic layers were dried over Na<sub>2</sub>SO<sub>4</sub>, filtered, and concentrated. The residue was purified by silica gel column chromatography to give de-dibrominated oxidized cholesterol.

Compound **25**

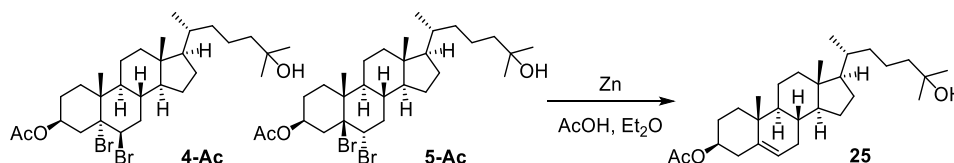

**General Procedure A** was followed for compound **4-Ac** (17 mg, 28 μmol) and **5-Ac** (11 mg, 18 μmol), which was converted to **25** (12 mg, 93%) and **25** (5.3 mg, 66%), respectively.

**<sup>1</sup>H NMR (500 MHz, CDCl<sub>3</sub>)**: δ 5.37 (d, *J* = 4.9 Hz, 1H), 4.64–4.57 (m, 1H), 2.34–2.28 (m, 2H), 2.05–1.93 (m, 5H), 1.89–1.78 (m, 3H), 1.63–1.32 (m, 10Hs), 1.30–1.22 (m, 2H), 1.21 (s, 6H), 1.20–1.03 (m, 7H), 1.02 (s, 3H), 1.00–0.95 (m, 1H), 0.93 (d, *J* = 6.8 Hz, 3H), 0.91–0.86 (m, 1H), 0.68 (s, 3H)

**<sup>13</sup>C NMR (126 MHz, CDCl<sub>3</sub>)**: δ 170.7, 139.8, 122.8, 74.1, 71.3, 56.8, 56.2, 50.2, 44.6, 42.5, 39.9, 38.3, 37.1, 36.7, 36.6, 35.9, 32.0, 32.0, 29.5, 29.4, 28.4, 27.9, 24.4, 21.6, 21.2, 20.9, 19.5, 18.8, 12.0

**MS-ESI (m/z)**: [M+Na]<sup>+</sup> calcd for C<sub>29</sub>H<sub>48</sub>O<sub>3</sub>Na 467.3496, found 467.3565.

## 2-2: Preparation and oxidation of 3-Bz-cholesterols

### Compound 1-Bz

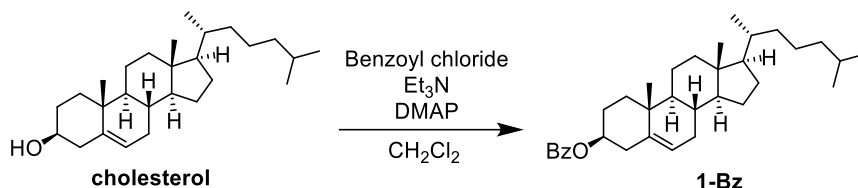

To a solution of cholesterol (3.00 g, 7.76 mmol, 1.0 equiv.) and DMAP (94.8 mg, 0.776 mmol, 0.1 equiv.) in  $\text{CH}_2\text{Cl}_2$  (39 mL, 0.2 M) was added  $\text{Et}_3\text{N}$  (3.3 mL, 23.3 mmol, 3.0 equiv.) and benzoyl chloride (1.4 mL, 11.6 mmol, 1.5 equiv.) at 0 °C. After the mixture was stirred for 4.5 h at room temperature, more DMAP (94.8 mg, 0.776 mmol, 0.1 equiv.) was added. The mixture was stirred for total 23.5 h. The mixture was quenched with saturated aqueous  $\text{NaHCO}_3$  at 0°C and extracted with  $\text{CH}_2\text{Cl}_2$  (3 x 30 mL). The combined organic layers were washed with aqueous 1 N HCl and aqueous saturated  $\text{NaHCO}_3$  and the separated water layer was extracted with  $\text{CH}_2\text{Cl}_2$ . The combined organic layers were dried over  $\text{Na}_2\text{SO}_4$ , filtered, and concentrated. The residue was purified by silica gel column chromatography (eluent: hexane/EtOAc 50/1 to 5/1) to give **1-Bz** (3.74 g, 7.62 mmol, 98%) as a white solid.

**$^1\text{H}$  NMR (500 MHz,  $\text{CDCl}_3$ ):**  $\delta$  8.04 (dd,  $J$  = 8.4, 1.4 Hz, 2H), 7.54 (tt,  $J$  = 7.4, 1.4 Hz, 1H), 7.43 (t,  $J$  = 7.6 Hz, 2H), 5.42 (d,  $J$  = 3.7 Hz, 1H), 4.86 (m, 1H), 2.47 (d,  $J$  = 7.6 Hz, 2H), 2.04–1.97 (m, 3H), 1.92 (dt,  $J$  = 13.3, 3.4 Hz, 1H), 1.88–1.80 (m, 1H), 1.78–1.69 (m, 1H), 1.62–1.44 (m, 7H), 1.41–1.30 (m, 3H), 1.28–1.06 (m, 7H), 1.07 (s, 3H), 1.05–0.97 (m, 3H), 0.92 (d,  $J$  = 6.7 Hz, 3H), 0.87 (dd,  $J$  = 6.6, 2.3 Hz, 6H), 0.69 (s, 3H).

### Compound 2-Bz and 3-Bz

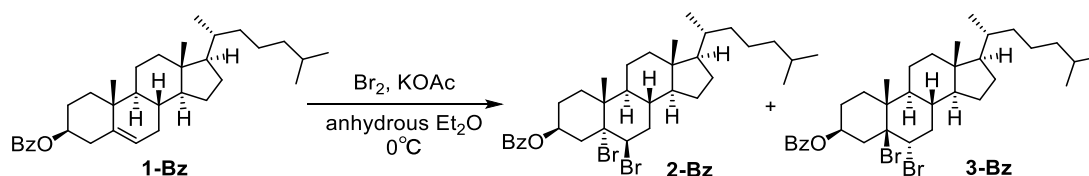

To a solution of **1-Bz** (3.63 g, 7.40 mmol, equiv.) in anhydrous  $\text{Et}_2\text{O}$  (90 mL, 82.5 mM) was added a solution of KOAc (5.6 g) in glacial acetic acid (56 mL) at 0°C, and then added a solution of  $\text{Br}_2$  (3.8 mL, 74 mmol, 10 equiv.) in glacial acetic acid (28 mL) at 0°C. After stirring for 3 h at 0°C, the reaction was allowed to warm to room temperature and stirred overnight. The resulting mixture was quenched with aqueous 1 M  $\text{Na}_2\text{S}_2\text{O}_3$  at room temperature and extracted with diethyl ether (3 x 30 mL). The combined organic layer was washed with aqueous 1 M  $\text{Na}_2\text{S}_2\text{O}_3$  (30 mL), followed by aqueous 1 M  $\text{K}_2\text{CO}_3$  (3 x 50 mL), dried over  $\text{Na}_2\text{SO}_4$ , filtered, and concentrated. The residue was purified by MPLC (Yamazen, Ultrapack 40D eluent: hexane/EtOAc = 98/2) to give dibromide **2-Bz** (2.06 mg, 3.2 mmol, 43%) and the isomer **3-Bz** (1.03 mg, 1.6 mmol, 22%).

### Compound 2-Bz:

**$^1\text{H}$  NMR (500 MHz,  $\text{CDCl}_3$ ):**  $\delta$  8.06 (dd,  $J$  = 8.4, 1.4 Hz, 2H), 7.56 (tt,  $J$  = 7.4, 1.5 Hz, 1H), 7.44 (t,  $J$  = 7.6 Hz, 2H), 5.75 (m, 1H), 4.87 (d,  $J$  = 2.4 Hz, 1H), 2.76–2.66 (m, 2H), 2.42 (ddd,  $J$  = 14.0, 5.3, 1.6 Hz, 1H), 2.12–2.00 (m, 3H), 1.94–1.77 (m, 4H), 1.69–1.62 (m, 3H), 1.52 (s, 3H), 1.50–1.46 (m, 1H), 1.38–1.20 (m, 8H), 1.17–1.00 (m, 6H), 0.92 (d,  $J$  = 6.4 Hz, 3H), 0.87 (dd,  $J$  = 6.6, 2.3 Hz, 6H), 0.72 (s, 3H).

Compound **3-Bz**:

**<sup>1</sup>H NMR (500 MHz, CDCl<sub>3</sub>):** δ 8.18 (dd, *J* = 8.2, 1.2 Hz, 2H), 7.54 (tt, *J* = 7.4, 1.4 Hz, 1H), 7.43 (t, *J* = 7.8 Hz, 2H), 5.48 (d, *J* = 2.4 Hz, 1H), 4.92 (dd, *J* = 12.7, 5.0 Hz, 1H), 2.95 (d, *J* = 17.1 Hz, 1H), 2.55 (dd, *J* = 16.8, 4.6 Hz, 1H), 2.29–2.18 (m, 2H), 2.07–2.01 (m, 1H), 1.87 (s, 1H), 1.79–1.69 (m, 3H), 1.62–1.56 (m, 3H), 1.52–1.43 (m, 5H), 1.41–1.27 (m, 5H), 1.28 (s, 3H), 1.18–0.99 (m, 9H), 0.90 (d, *J* = 6.7 Hz, 3H), 0.87 (dd, *J* = 6.6, 2.3 Hz, 6H), 0.66 (s, 3H).

[Ru-catalyzed oxidation of compound **2-Bz** followed by debromination]

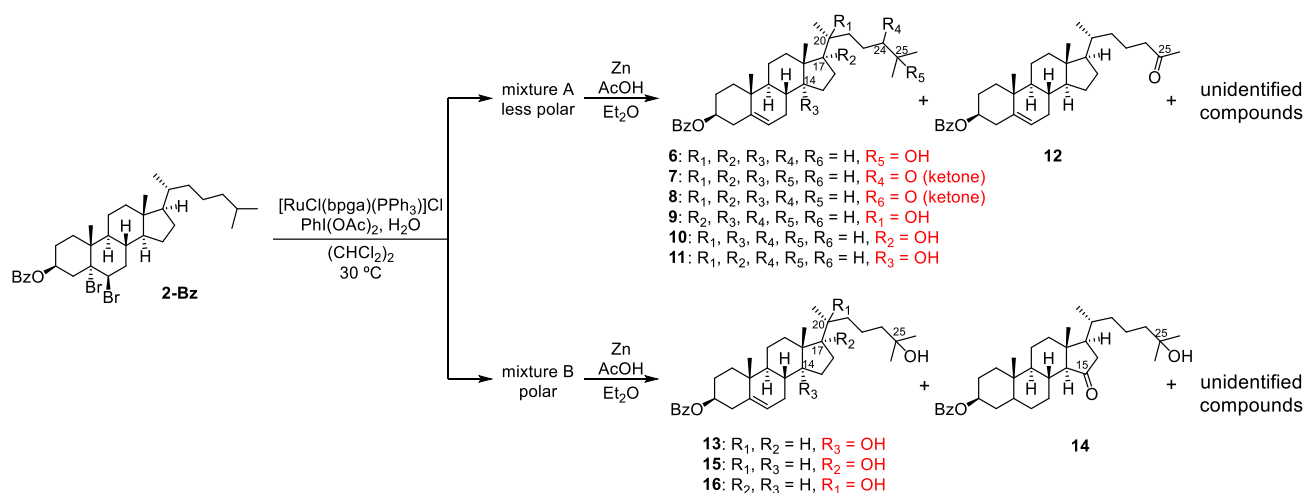

To a 10 mL screw-cap vial was added **2-Bz** (400 mg, 615  $\mu\text{mol}$ , 1.0 equiv.), iodobenzene diacetate (PIDA, 198 mg, 615  $\mu\text{mol}$ , 1.0 equiv.),  $\text{H}_2\text{O}$  (30  $\mu\text{L}$ ),  $(\text{CHCl}_2)_2$  (1.5 mL), and a magnetic stir bar. The vial was placed on an aluminum block at  $30^\circ\text{C}$ , added  $[\text{RuCl}(\text{bpg})(\text{PPh}_3)]\text{Cl}$  (9.6 mg, 12  $\mu\text{mol}$ , 2 mol%), and sealed with a screw cap. After stirring for 24 h, the suspended brown mixture was turned to be clear brown solution. Then PIDA (198 mg, 1.0 equiv.) was added to the mixture. After stirring for 41 h, the mixture was filtered through a pad of Celite<sup>®</sup> and concentrated. The residue was purified by silica gel column chromatography (eluent: hexane/EtOAc 50/1 to 1/2), to give less polar mixture **A** (263 mg), polar mixture **B** (95.3 mg), and a mixture of recovered **2-Bz** and **3-Bz** (111.4 mg, 28%, **2-Bz**:**3-Bz** = 1:3).

This reaction was performed in 917 mg scale and gave **4-Bz** (101 mg, 0.15 mmol, 11%), the isomer **5-Bz** (220 mg, 0.33 mmol, 24%), less polar mixture **A'** (200 mg), polar mixture **B'** (215 mg), and recovered **2-Bz** (204 mg, 0.31 mmol, 22%).

Compound **4-Bz**:

**<sup>1</sup>H NMR (500 MHz, CDCl<sub>3</sub>):** δ 8.06 (d, *J* = 8.3 Hz, 2H), 7.56 (t, *J* = 7.1 Hz, 1H), 7.44 (t, *J* = 7.6 Hz, 2H), 5.78–5.72 (m, 1H), 4.87 (s, 1H), 2.76–2.67 (m, 2H), 2.43 (dd, *J* = 14.2, 4.9 Hz, 1H), 2.11–2.01 (m, 3H), 1.94–1.77 (m, 4H), 1.68–1.55 (m, 4H), 1.52 (s, 3H), 1.50–1.28 (m, 9H), 1.22 (s, 6H), 1.19–1.02 (m, 4H), 0.94 (d, *J* = 6.3 Hz, 3H), 0.73 (s, 3H).

**<sup>13</sup>C NMR (126 MHz, CDCl<sub>3</sub>):** δ 166.1, 133.0, 130.7, 129.8 (2C), 128.5 (2C), 88.3, 72.9, 71.2, 56.3, 56.2, 55.3, 47.4, 44.6, 42.9, 42.2, 42.1, 39.8, 37.4, 36.7, 36.5, 35.9, 31.0, 29.5, 29.4, 28.3, 26.5, 24.2, 21.5, 21.0, 20.4, 18.8, 12.4.

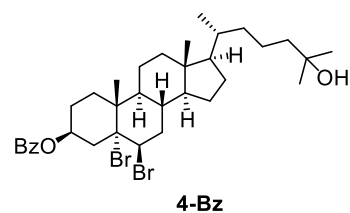

Compound **5-Bz**:

**<sup>1</sup>H NMR (500 MHz, CDCl<sub>3</sub>):**  $\delta$  8.18 (d,  $J$  = 7.8 Hz, 2H), 7.54 (t,  $J$  = 7.3 Hz, 1H), 7.43 (t,  $J$  = 7.6 Hz, 2H), 5.48 (s, 1H), 4.92 (dd,  $J$  = 12.7, 4.9 Hz, 1H), 2.95 (d,  $J$  = 17.1 Hz, 1H), 2.55 (dd,  $J$  = 16.8, 4.1 Hz, 1H), 2.28–2.17 (m, 2H), 2.03 (d,  $J$  = 13.7 Hz, 1H), 1.87–1.82 (m, 1H), 1.79–1.69 (m, 3H), 1.64–1.54 (m, 3H), 1.50–1.35 (m, 8H), 1.29 (s, 3H), 1.29–1.24 (m, 2H), 1.22 (s, 6H), 1.19–1.04 (m, 5H), 0.93 (d,  $J$  = 6.3 Hz, 3H), 0.67 (s, 3H).

**<sup>13</sup>C NMR (126 MHz, CDCl<sub>3</sub>):**  $\delta$  166.2, 132.9, 130.8, 130.2 (2C), 128.4 (2C), 79.0, 71.2, 68.4, 64.2, 56.2, 56.1, 45.1, 44.5, 42.7, 41.8, 41.8, 39.8, 36.6, 36.5, 35.8, 35.1, 29.5, 29.4, 29.3, 28.3, 24.4, 24.2, 22.6, 21.4, 20.9, 18.8, 12.0.

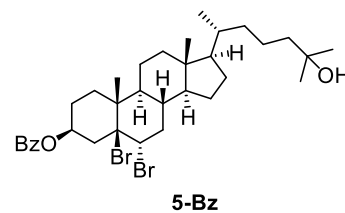

**General Procedure A** was followed for the less polar mixture **A** (189 mg, 280  $\mu$ mol, 1.0 equiv.) and the polar mixture **B** (190 mg, 280  $\mu$ mol) to give 126 mg of crude mixture and 129 mg of crude mixture, respectively.

The crude material derived from mixture **A** was purified by silica gel column chromatography (eluent: hexane/EtOAc 50/1 to 1/1) (For further purification, see Figure S2).

The crude material derived from mixture **B** was purified by silica gel column chromatography (eluent: hexane/EtOAc 82/18 to 50/50) (For further purification, see Figure S9).

## <Isolation scheme>

### • Oxidized compounds derived from the crude mixture A (less polar)

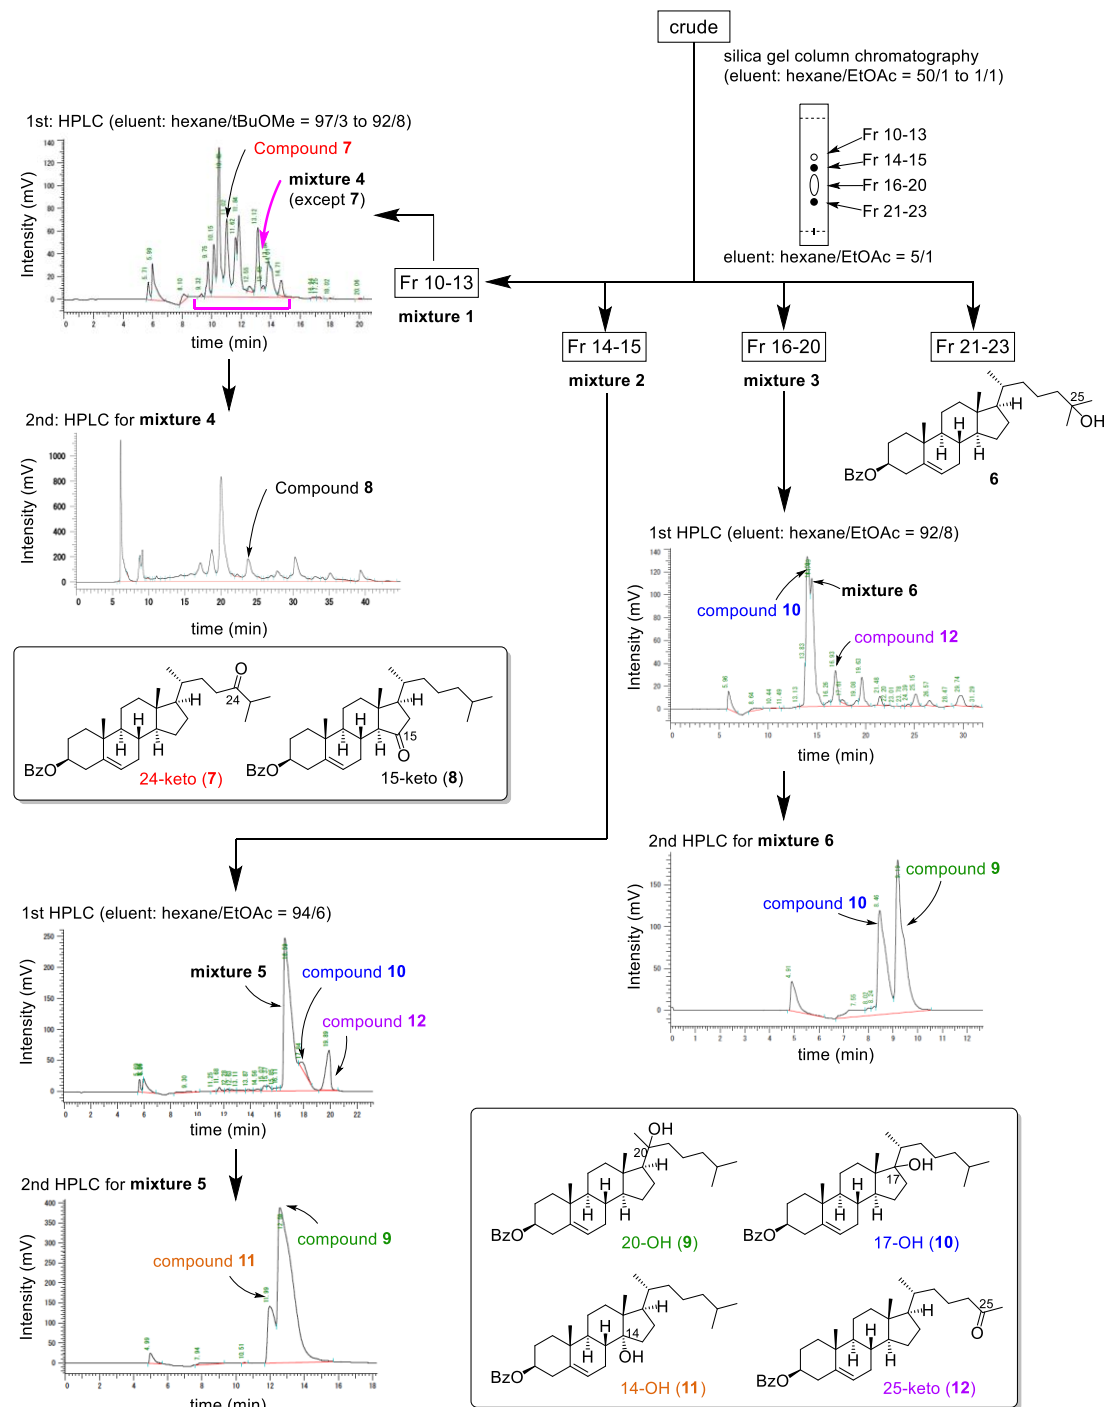

**Figure S2. Purification of oxidized cholesterol (part 2)**

After the silica gel column chromatography, the combined fractions 21-23 were concentrated to give **6** (79.4 mg, 26%). For fractions 10-13, further purification was carried out by HPLC (Figure S2) to give **7** (2.0 mg, 0.99%). For fractions 14-15, further purification was carried out by HPLC to give **9** (10.5 mg, 3.5%), **10** (11.3 mg, 3.7%), **11** (1.0 mg, 0.33%), and **12** (3.2 mg, 1.1%).

Compound 6 (3-*O*-Bz-25-hydroxy cholesterol)

**<sup>1</sup>H NMR (500 MHz, CDCl<sub>3</sub>):** δ 8.04 (m, 2H), 7.54 (m, 1H), 7.43 (m, 2H), 5.42 (d, *J* = 3.9 Hz, 1H), 4.90–4.83 (m, 1H), 2.47 (d, *J* = 7.8 Hz, 2H), 2.04–1.98 (m, 3H), 1.92 (dt, *J* = 13.7, 3.4 Hz, 1H), 1.86–1.80 (m, 1H), 1.78–1.70 (m, 1H), 1.60–1.36 (m, 10H), 1.30–1.22 (m, 4H), 1.22 (s, 6H), 1.19–1.15 (m, 1H), 1.07 (s, 3H), 1.13–0.97 (m, 4H), 0.94 (d, *J* = 6.3 Hz, 3H), 0.69 (s, 3H).

**<sup>13</sup>C NMR (125 MHz, CDCl<sub>3</sub>):** δ 166.2, 139.8, 132.9, 131.0, 129.7 (2C), 128.4 (2C), 122.9, 74.7, 71.3, 56.8, 56.2, 50.2, 44.6, 42.5, 39.9, 38.4, 37.2, 36.8, 36.6, 35.9, 32.1, 32.1, 29.5, 29.4, 28.4, 28.0, 24.4, 21.2, 21.0, 19.5, 18.9, 12.0.

**MS-ESI (m/z):** [M+Na]<sup>+</sup> calcd for C<sub>34</sub>H<sub>50</sub>O<sub>3</sub>Na 529.3652, found 529.3558.

Compound 7:

**<sup>1</sup>H NMR (500 MHz, CDCl<sub>3</sub>):** δ 8.04 (m, 2H), 7.54 (m, 1H), 7.43 (m, 2H), 5.42 (d, *J* = 3.7 Hz, 1H), 4.89–4.83 (m, 1H), 2.64–2.58 (m, 1H), 2.51–2.44 (m, 3H), 2.39–2.33 (m, 1H), 2.03–1.99 (m, 3H), 1.94–1.89 (m, 1H), 1.88–1.84 (m, 1H), 1.78–1.70 (m, 2H), 1.63–1.59 (m, 1H), 1.54–1.46 (m, 4H), 1.44–1.16 (m, 5H), 1.09 (d, *J* = 7.0 Hz, 6H), 1.07 (s, 3H), 1.14–0.96 (m, 4H), 0.92 (d, *J* = 6.4 Hz, 3H), 0.69 (s, 3H).

**<sup>13</sup>C NMR (125 MHz, CDCl<sub>3</sub>):** δ 215.7, 166.2, 139.8, 132.9, 131.0, 129.7 (2C), 128.4 (2C), 122.9, 77.4, 77.2, 76.9, 74.7, 56.8, 56.0, 50.2, 42.5, 41.0, 39.9, 38.4, 37.4, 37.2, 36.8, 35.5, 32.1, 32.0, 30.0, 28.3, 28.0, 24.4, 21.2, 19.5, 18.7, 18.5, 18.5, 12.0.

**MS-ESI (m/z):** [M+Na]<sup>+</sup> calcd for C<sub>34</sub>H<sub>48</sub>O<sub>3</sub>Na 527.3496, found 527.3441.

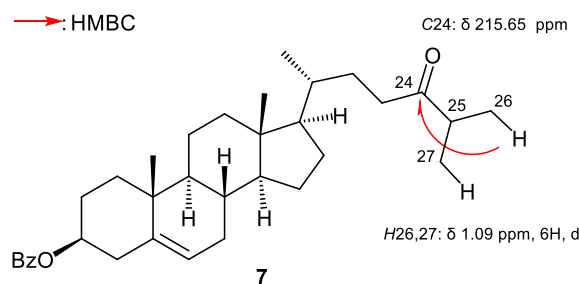

**Figure S3. Characteristic HMBC correlation for structural determination of 7**

Compound 8:

**<sup>1</sup>H NMR (500 MHz, CDCl<sub>3</sub>):** δ 8.06–8.02 (m, 2H), 7.57–7.52 (m, 1H), 7.46–7.41 (m, 2H), 5.43 (brd, *J* = 4.9 Hz, 1H), 4.89–4.81 (m, 1H), 2.86 (ddd, *J* = 17.7, 4.6, 4.6 Hz, 1H), 2.49–2.41 (m, 3H), 2.19–2.14 (m, 1H), 2.05–1.98 (m, 1H), 1.92 (ddd, *J* = 13.3, 3.4, 3.4 Hz, 1H), 1.87–1.68 (m, 4H), 1.64–0.98 (m, 15H), 1.07 (s, 3H), 1.01 (d, *J* = 6.7 Hz, 3H), 0.872 (d, *J* = 6.7 Hz, 3H), 0.868 (d, *J* = 6.7 Hz, 3H), 0.78 (s, 3H).

**<sup>13</sup>C NMR (125 MHz, CDCl<sub>3</sub>):** δ 216.2, 166.2, 139.1, 132.9, 130.9, 129.7 (2C), 128.4 (2C), 122.8, 74.6, 66.8, 51.8, 49.7, 42.3, 41.9, 39.8, 39.5, 38.2, 37.2, 36.5, 36.2, 35.5, 31.3, 28.13, 28.10, 28.0, 23.9, 22.9, 22.7, 20.9, 19.3, 19.2, 12.9.

**MS-ESI (m/z):** [M+Na]<sup>+</sup> calcd for C<sub>34</sub>H<sub>48</sub>O<sub>3</sub>Na 527.3496, found 527.3421.

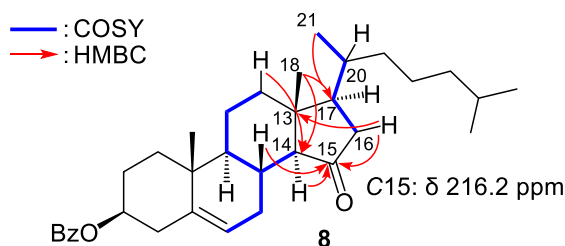

**Figure S4. Characteristic HMBC and COSY correlations for structural determination of 8**

Compound 9:

**$^1\text{H}$  NMR (500 MHz,  $\text{CDCl}_3$ ):**  $\delta$  8.04 (m, 2H), 7.54 (m, 1H), 7.43 (m, 2H), 5.42 (d,  $J = 3.7$  Hz, 1H), 4.90–4.82 (m, 1H), 2.47 (d,  $J = 7.6$  Hz, 2H), 2.11 (dt,  $J = 12.3, 3.4$  Hz, 1H), 2.02–1.98 (m, 2H), 1.92 (dt,  $J = 13.5, 3.5$  Hz, 1H), 1.80–1.61 (m, 5H), 1.57–1.39 (m, 6H), 1.28 (s, 3H), 1.34–1.12 (m, 8H), 1.07 (d,  $J = 5.5$  Hz, 3H), 1.05–0.96 (m, 2H), 0.88 (s, 3H), 0.88 (d,  $J = 6.7$  Hz, 6H).

**$^{13}\text{C}$  NMR (125 MHz,  $\text{CDCl}_3$ ):**  $\delta$  166.2, 139.8, 132.9, 131.0, 129.7 (2C), 128.4 (2C), 122.8, 75.4, 74.7, 57.8, 57.0, 50.1, 44.4, 42.8, 40.2, 39.8, 38.4, 37.2, 36.8, 32.0, 31.5, 28.1, 28.0, 26.6, 23.9, 22.9, 22.7, 22.5, 22.2, 21.1, 19.5, 13.8.

**MS-ESI ( $m/z$ ):**  $[\text{M}+\text{Na}]^+$  calcd for  $\text{C}_{34}\text{H}_{50}\text{O}_3\text{Na}$  529.3652, found 529.3597.

**$[\alpha]_{\text{D}}^{27}$**   $-27.780$  ( $c = 2.7$ ,  $\text{CHCl}_3$ )

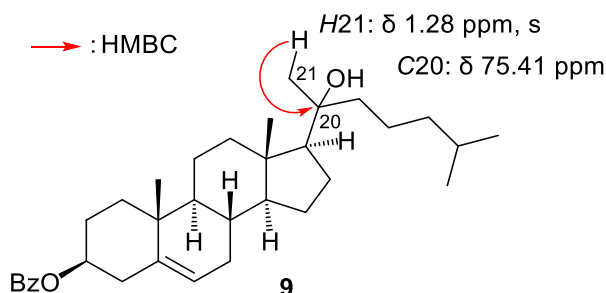

**Figure S5. Characteristic HMBC correlation for structural determination of 9**

Compound 10:

**$^1\text{H}$  NMR (500 MHz,  $\text{CDCl}_3$ ):**  $\delta$  8.04 (m, 2H), 7.54 (m, 1H), 7.43 (m, 2H), 5.43 (d,  $J = 4.9$  Hz, 1H), 4.87–4.83 (m, 1H), 2.47 (d,  $J = 7.8$  Hz, 2H), 2.02–1.99 (m, 2H), 1.92 (dt,  $J = 13.3, 3.7$  Hz, 1H), 1.85–1.59 (m, 9H), 1.54–1.43 (m, 5H), 1.28–1.09 (m, 7H), 1.08 (s, 3H), 1.03 (td,  $J = 11.6, 4.6$  Hz, 1H), 0.91 (d,  $J = 6.8$  Hz, 3H), 0.87 (dd,  $J = 6.8, 3.0$  Hz, 6H), 0.79 (s, 3H).

**$^{13}\text{C}$  NMR (125 MHz,  $\text{CDCl}_3$ ):**  $\delta$  166.1, 139.7, 132.9, 131.0, 129.7 (2C), 128.4 (2C), 122.9, 86.6, 74.7, 51.3, 49.8, 47.4, 39.9, 39.5, 38.4, 38.3, 37.2, 36.8, 32.5, 32.5, 32.4, 32.1, 28.1, 28.0, 25.8, 23.9, 23.0, 22.7, 21.0, 19.5, 14.5, 14.2.

**MS-ESI ( $m/z$ ):**  $[\text{M}+\text{Na}]^+$  calcd for  $\text{C}_{34}\text{H}_{50}\text{O}_3\text{Na}$  529.3652, found 529.3597

**$[\alpha]_{\text{D}}^{24}$**   $-13.105$  ( $c = 1.1$ ,  $\text{CHCl}_3$ ).

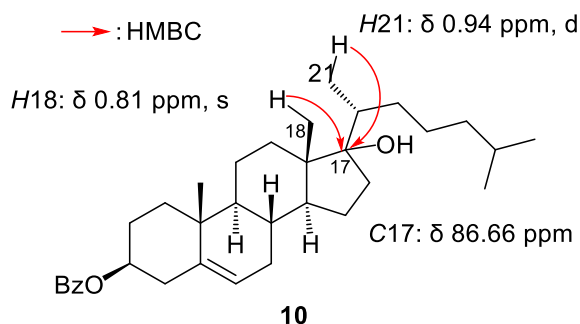

**Figure S6. Characteristic HMBC correlations for structural determination of 10**

Compound **11**:

**<sup>1</sup>H NMR (500 MHz, CDCl<sub>3</sub>):** δ 8.04 (m, 2H), 7.54 (m, 1H), 7.43 (m, 2H), 5.46 (d, *J* = 2.9 Hz, 1H), 4.89–4.82 (m, 1H), 2.49–2.46 (m, 2H), 2.17–2.11 (m, 1H), 2.02–1.96 (m, 2H), 1.95–1.83 (m, 3H), 1.79–1.69 (m, 4H), 1.54–1.23 (m, 11H), 1.19–1.12 (m, 3H), 1.09 (s, 3H), 1.06–1.00 (m, 1H), 0.90 (d, *J* = 6.4 Hz, 3H), 0.87 (dd, *J* = 6.7, 2.1 Hz, 6H), 0.84 (s, 3H).

**<sup>13</sup>C NMR (125 MHz, CDCl<sub>3</sub>):** δ 166.1, 139.3, 132.9, 131.0, 129.7 (2C), 128.4 (2C), 122.9, 85.3, 74.6, 51.3, 46.6, 43.4, 39.7, 38.3, 37.2, 37.1, 36.5, 35.8, 34.9, 32.8, 31.9, 28.2, 28.0, 27.3, 26.1, 24.2, 23.0, 22.7, 20.0, 19.4, 18.8, 15.6.

**MS-ESI (m/z):** [M+Na]<sup>+</sup> calcd for C<sub>34</sub>H<sub>50</sub>O<sub>3</sub>Na 529.3652, found 529.3597.

**[α]<sub>D</sub><sup>24</sup>** 7.783 (c = 0.81, CHCl<sub>3</sub>)

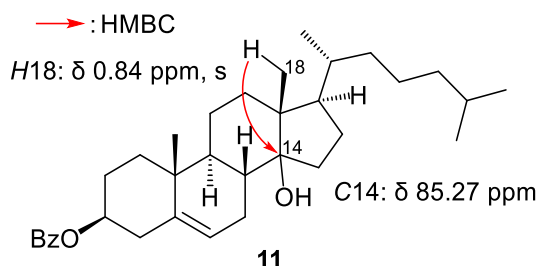

**Figure S7. Characteristic HMBC correlations for structural determination of 11**

Compound **12**:

**<sup>1</sup>H NMR (500 MHz, CDCl<sub>3</sub>):** δ 8.04 (m, 2H), 7.54 (m, 1H), 7.43 (m, 2H), 5.42 (d, *J* = 3.7 Hz, 1H), 4.89–4.83 (m, 1H), 2.46 (d, *J* = 7.6 Hz, 2H), 2.43–2.33 (m, 2H), 2.13 (s, 3H), 2.03–1.96 (m, 3H), 1.92 (dt, *J* = 13.4, 3.5 Hz, 1H), 1.87–1.77 (m, 1H), 1.75–1.72 (m, 1H), 1.70–1.32 (m, 10H), 1.28–0.93 (m, 7H), 1.07 (s, 3H), 0.94 (d, *J* = 6.7 Hz, 3H), 0.69 (s, 3H).

**<sup>13</sup>C NMR (125 MHz, CDCl<sub>3</sub>):** δ 209.6, 166.2, 139.8, 132.9, 131.0, 129.7 (2C), 128.4 (2C), 122.9, 77.4, 77.2, 76.9, 74.7, 56.8, 56.0, 50.2, 44.4, 42.5, 39.9, 38.4, 37.2, 36.8, 35.8, 35.6, 32.1, 32.0, 30.0, 28.4, 28.0, 24.4, 21.2, 20.6, 19.5, 18.8, 12.0.

**MS-ESI (m/z):** [M+Na]<sup>+</sup> calcd for C<sub>33</sub>H<sub>46</sub>O<sub>3</sub>Na 513.3339, found 513.3392.



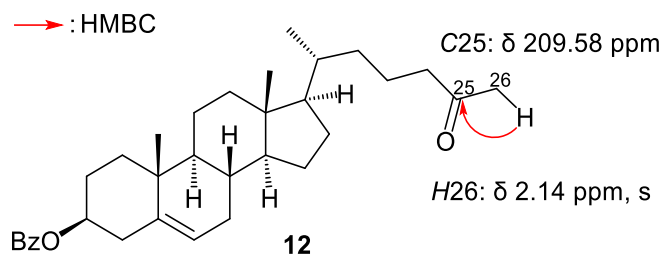

**Figure S8. Characteristic HMBC correlations for structural determination of 12**

### <Isolation scheme>

#### • Oxidized compounds derived from mixture B (polar)

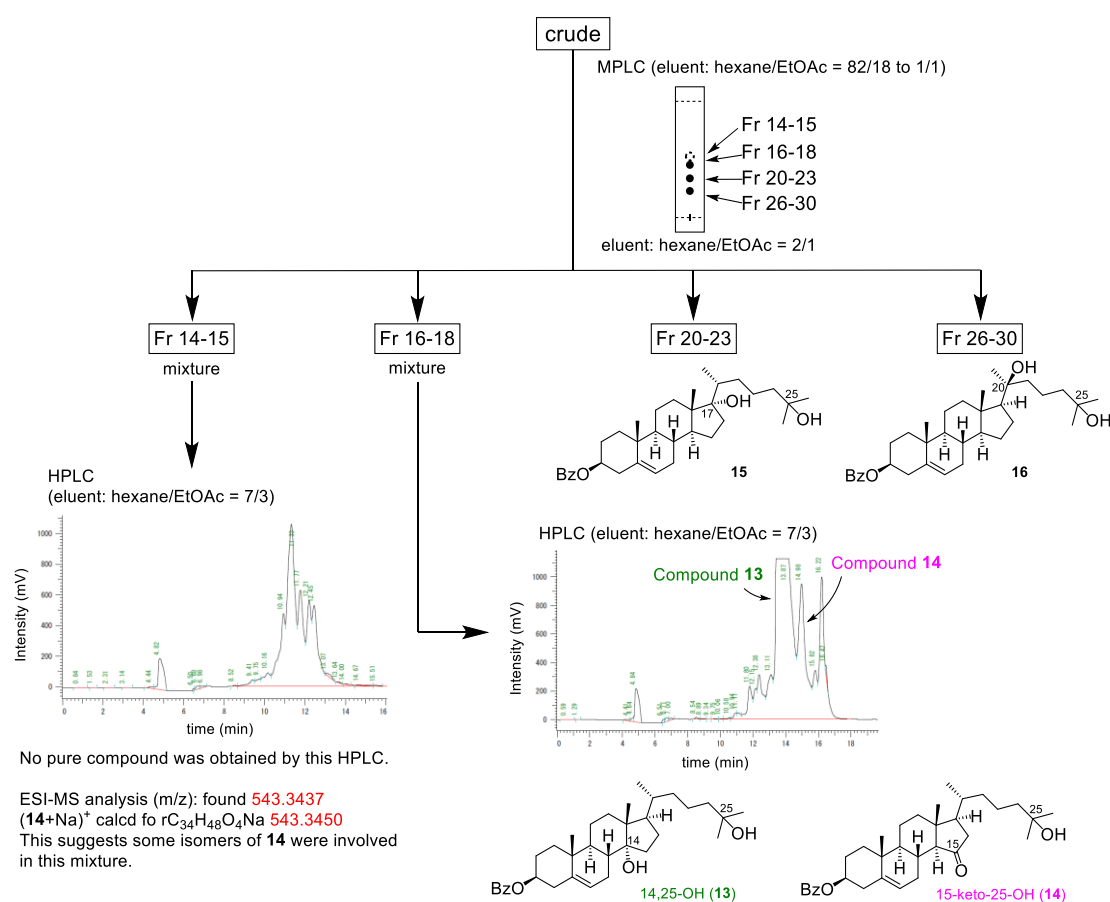

**Figure S9. Purification of oxidized cholesterol (part 3)**

After silica gel column chromatography, the combined fractions 20-23 were concentrated to give **15** (14.6 mg, 4.7%). The combined fractions 26-30 were concentrated to give **16** (15.7 mg, 5.0%). Further purification was carried out for the fractions 16-18 by HPLC (Senshu-Pak, PEGASIL,  $\phi$ 10-250, 3 mL/min, hexane/EtOAc 7/3) to give **13** (4.7 mg, 1.5%) and **14** (0.7 mg, 0.22%).

#### Compound **13**:

<sup>1</sup>H NMR (500 MHz, CDCl<sub>3</sub>):  $\delta$  8.04 (m, 2H), 7.54 (m, 1H), 7.43 (m, 2H), 5.46 (d,  $J$  = 2.7 Hz, 1H), 4.88–4.83 (m, 1H), 2.49–2.46 (m, 2H), 2.17–2.11 (m, 1H), 2.04–1.96 (m, 2H), 1.95–1.69 (m, 7H), 1.54–1.33 (m, 11H), 1.30–1.22 (m, 2H), 1.22 (s, 6H), 1.09 (s, 3H), 1.10–1.07 (m, 1H), 0.92 (d,  $J$  = 6.7 Hz, 3H), 0.84 (s, 3H).

**<sup>13</sup>C NMR (125 MHz, CDCl<sub>3</sub>):** δ 166.1, 139.3, 132.9, 131.0, 129.7 (2C), 128.4 (2C), 122.9, 85.3, 74.6, 71.3, 51.3, 46.7, 44.5, 43.4, 38.3, 37.2, 37.1, 36.8, 35.8, 34.9, 32.8, 31.9, 29.5, 29.4, 28.0, 27.3, 26.1, 21.2, 20.0, 19.4, 18.8, 15.6.

**MS-ESI (m/z):** [M+Na]<sup>+</sup> calcd for C<sub>34</sub>H<sub>50</sub>O<sub>4</sub>Na 545.3601, found 545.3642.

**[α]<sub>D</sub><sup>26</sup>** 7.959 (c = 0.44, CHCl<sub>3</sub>)

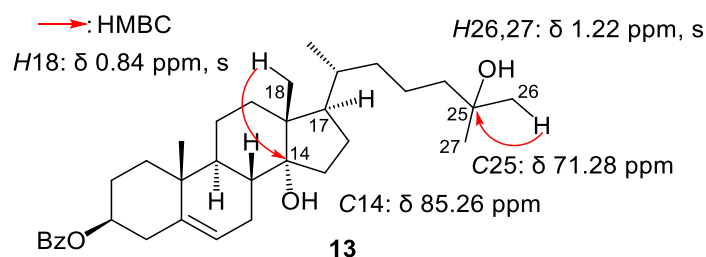

**Figure S10. Characteristic HMBC correlations for structural determination 13**

**Compound 14:**

**<sup>1</sup>H NMR (500 MHz, CDCl<sub>3</sub>):** δ 8.04 (m, 2H), 7.54 (m, 1H), 7.43 (m, 2H), 5.43 (d, *J* = 4.0 Hz, 1H), 4.89–4.82 (m, 1H), 2.86 (dt, *J* = 17.7, 4.9 Hz, 1H), 2.47 (m, 3H), 2.18–2.16 (m, 1H), 2.04–2.00 (m, 1H), 1.92 (dt, *J* = 13.2, 3.2 Hz, 1H), 1.83–1.72 (m, 4H), 1.63–1.59 (m, 3H), 1.54–1.28 (m, 7H), 1.28–1.17 (m, 2H), 1.22 (s, 6H), 1.07 (s, 3H), 1.12–1.07 (m, 1H), 1.03 (d, *J* = 6.4 Hz, 3H), 1.05–1.02 (m, 1H), 0.78 (s, 3H).

**<sup>13</sup>C NMR (125 MHz, CDCl<sub>3</sub>):** δ 216.0, 166.2, 139.1, 132.9, 130.9, 129.7 (2C), 128.4 (2C), 122.8, 74.6, 71.2, 66.8, 51.8, 49.6, 44.3, 42.3, 41.9, 39.8, 38.2, 37.2, 36.5, 36.4, 35.5, 31.3, 29.6, 29.4, 28.1, 28.0, 20.9, 20.8, 19.3, 19.1, 12.9.

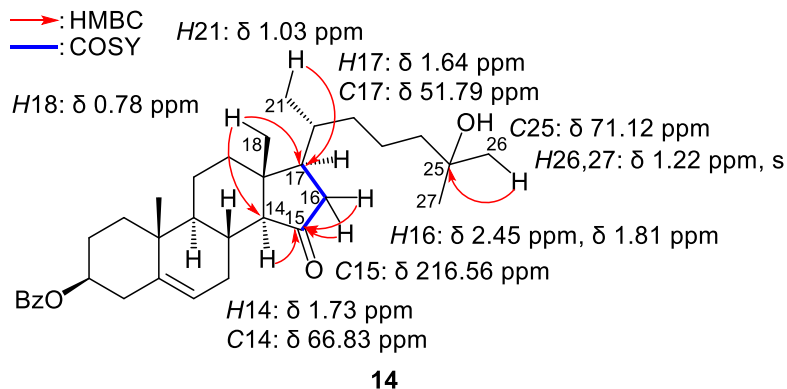

**Figure S11. Characteristic HMBC and COSY correlations for structural determination of 14**

**Compound 15:**

**<sup>1</sup>H NMR (500 MHz, CDCl<sub>3</sub>):** δ 8.04 (m, 2H), 7.54 (m, 1H), 7.43 (m, 2H), 5.42 (d, *J* = 4.6 Hz, 1H), 4.89–4.83 (m, 1H), 2.47 (d, *J* = 7.6 Hz, 2H), 2.12–2.07 (m, 1H), 2.01–1.97 (m, 2H), 1.91 (dt, *J* = 13.4, 3.4 Hz, 1H), 1.77–1.35 (m, 15H), 1.30 (s, 3H), 1.23 (s, 6H), 1.23–1.10 (m, 3H), 1.07 (s, 3H), 1.05–0.96 (m, 2H), 0.87 (s, 3H).

**<sup>13</sup>C NMR (125 MHz, CDCl<sub>3</sub>):** δ 166.2, 139.8, 132.9, 131.0, 129.7 (2C), 128.4 (2C), 122.8, 75.4, 74.7, 71.2, 58.0, 57.0, 50.1, 44.6, 44.4, 42.8, 40.2, 38.3, 37.2, 36.8, 31.9, 31.5, 29.6, 29.4, 28.0, 26.5, 23.9, 22.6, 21.0, 19.5, 19.1, 13.8.

**HRMS-ESI (m/z):** [M+Na]<sup>+</sup> calcd for C<sub>34</sub>H<sub>50</sub>O<sub>4</sub>Na 545.3601, found 545.3628.

**[α]<sub>D</sub><sup>26</sup>** −25.639 (c = 3.48, CHCl<sub>3</sub>)

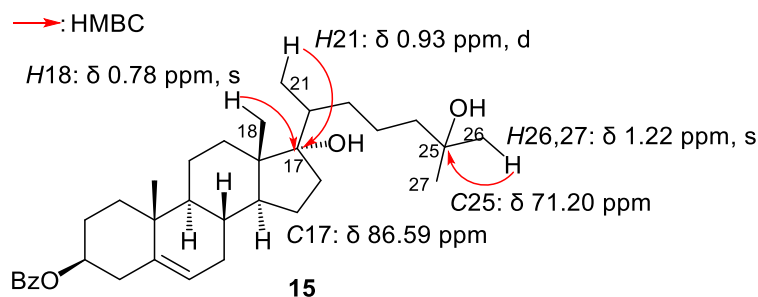

**Figure S12. Characteristic HMBC correlations for structural determination of 15**

Compound **16**:

**<sup>1</sup>H NMR (500 MHz, CDCl<sub>3</sub>):** δ 8.04 (m, 2H), 7.54 (m, 1H), 7.43 (m, 2H), 5.43 (d, *J* = 4.6 Hz, 1H), 4.90–4.83 (m, 1H), 2.47 (d, *J* = 7.8 Hz, 2H), 2.02–1.98 (m, 2H), 1.92 (dt, *J* = 13.4, 3.5 Hz, 1H), 1.85–1.77 (m, 1H), 1.75–1.67 (m, 6H), 1.65–1.38 (m, 9H), 1.25–1.20 (m, 3H), 1.22 (s, 6H), 1.13 (dd, *J* = 21.2, 17.2 Hz, 1H), 1.08 (s, 3H), 1.06–1.00 (m, 1H), 0.93 (d, *J* = 6.6 Hz, 3H), 0.79 (s, 3H).

**<sup>13</sup>C NMR (125 MHz, CDCl<sub>3</sub>):** δ 166.1, 139.7, 132.9, 131.0, 129.7 (2C), 128.4 (2C), 122.9, 86.6, 74.7, 71.2, 51.3, 49.8, 47.5, 44.4, 39.9, 38.4, 38.2, 37.2, 36.8, 32.8, 32.5, 32.4, 32.1, 29.5, 29.4, 28.0, 23.9, 22.7, 21.0, 19.5, 14.5, 14.1.

**HRMS-ESI (m/z):** [M+Na]<sup>+</sup> calcd for C<sub>34</sub>H<sub>50</sub>O<sub>4</sub>Na 545.3601, found 545.3602.

**[α]<sub>D</sub><sup>26</sup>** −12.662 (c = 2.61, CHCl<sub>3</sub>)

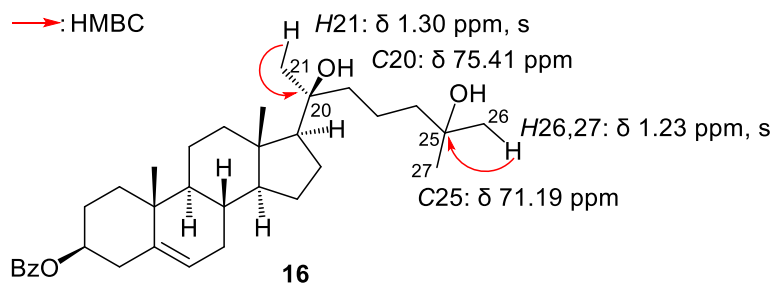

**Figure S13. Characteristic HMBC correlations for structural determination of 16**

## [Oxidation of compound 2-Bz using Fe catalyst]

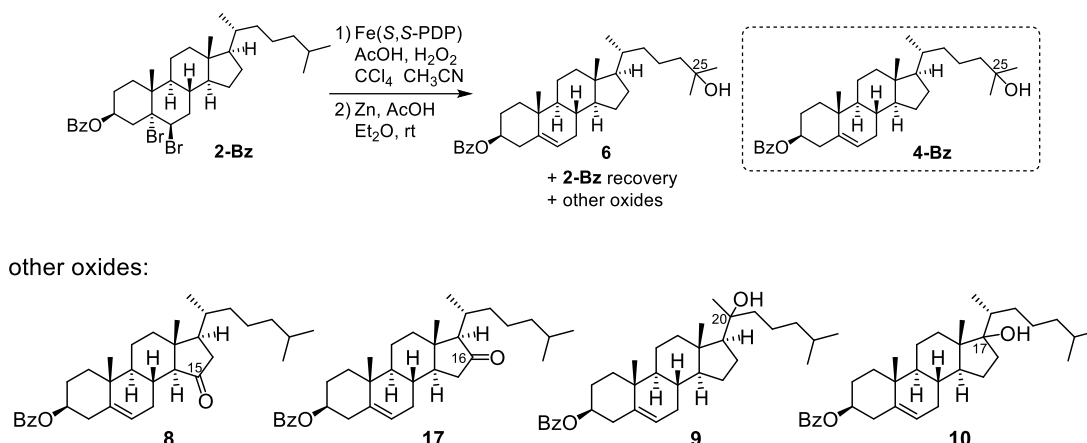

A recovery flask was charged with the following  $\text{Fe}(\text{S,S-PDP})$  (5 mol%), **2-Bz** (980 mg, 1.51 mmol, 1.0 equiv.),  $\text{CCl}_4$  (3.5 mL), and  $\text{AcOH}$  (43  $\mu\text{L}$ , 755  $\mu\text{mol}$ , 50 mol%) and a magnetic stir bar. The flask was placed on a stir plate and stirred vigorously at room temperature. A solution of  $\text{H}_2\text{O}_2$  (50 wt% in  $\text{H}_2\text{O}$ , 56  $\mu\text{L}$ , 1.8 mmol, 1.2 equiv.) in  $\text{CH}_3\text{CN}$  (1.6 mL) was added dropwise via syringe over about 120 seconds. After stirring for 10 minutes, a solution of  $\text{Fe}(\text{S,S-PDP})$  (5 mol%) and  $\text{AcOH}$  (50 mol%) in  $\text{CH}_3\text{CN}$  (0.2 M) was added via pipette, and then  $\text{H}_2\text{O}_2$  (50 wt.%, 1.2 equiv.) in  $\text{CH}_3\text{CN}$  (0.6 M) via syringe over about 120 seconds. Third and fourth addition was done in the same manner. After each addition, the mixture was stirred for 10 minutes. (The total reaction time was 40 minutes) The reaction was quenched with saturated aqueous  $\text{NaHCO}_3$ . The aqueous layer was extracted with  $\text{Et}_2\text{O}$  (3 x 20 mL). The combined organic layers were dried over  $\text{Na}_2\text{SO}_4$ , filtered, and concentrated. The residue was purified by silica gel column chromatography (eluent: hexane/ $\text{EtOAc}$  97/3 to 75/25) to give **4-Bz** (50.1 mg, 75.2  $\mu\text{mol}$ , 5%) and a mixture of other oxides and **2-Bz**. The mixture was subjected to de-bromination with Zn powder.

To a solution of the mixture of oxy-cholesterols (176 mg, 264  $\mu\text{mol}$ , 1.0 equiv.) and  $\text{AcOH}$  (54  $\mu\text{L}$ , 950  $\mu\text{mol}$ , 3.6 equiv.) in  $\text{Et}_2\text{O}$  (4.4 mL) was added Zn powder (173 mg, 2.64 mmol, 10 equiv.). After stirring vigorously for 1 h at room temperature,  $\text{AcOH}$  (54  $\mu\text{L}$ , 950  $\mu\text{mol}$ , 3.6 equiv.) and Zn powder (173 mg, 2.64 mmol, 10 equiv.) was added to the mixture. After further stirring for 2 h, the mixture was filtered through a pad of Celite<sup>®</sup>. The filtrate was washed with saturated aqueous  $\text{NaHCO}_3$  and the separated water layer was extracted with  $\text{Et}_2\text{O}$  (3 x 15 mL). The combined organic layers were dried over  $\text{Na}_2\text{SO}_4$ , filtered, and concentrated to give 120 mg of crude mixture. The mixture was purified by silica gel column chromatography (eluent: hexane/ $\text{EtOAc}$  97/3 to 2/1) to give a recovery of **1-Bz** (81.2 mg, 165  $\mu\text{mol}$ , 63%) and a mixture of oxidized cholesterols including **8**, **17**, **9**, and **10** (38.6 mg).

The mixture was purified by HPLC (Senshu-Pak, PEGASIL,  $\phi$ 10-250, 3 mL/min, hexane/ $t\text{BuOMe}$  97/3 to 92/8) to give **8** ( $t_R$  34 min, 1.8 mg, 0.24%), **17** ( $t_R$  43 min, 1.5 mg, 0.20%), **9** ( $t_R$  51 min, 3.5 mg, 0.46%), **10** ( $t_R$  62 min, 4.4 mg, 0.57%).

### Compound **17**:

<sup>1</sup>H NMR (500 MHz,  $\text{CDCl}_3$ ):  $\delta$  8.06–8.03 (m, 2H), 7.57–7.53 (m, 1H), 7.46–7.41 (m, 2H), 5.43 (d,  $J$  = 4.9 Hz, 1H), 4.91–4.83 (m, 1H), 2.50–2.46 (m, 2H), 2.22 (dd,  $J$  = 18.0, 7.3 Hz, 1H), 2.14–2.09 (m, 1H), 2.06–1.09 (m, 22H), 1.10 (s, 3H), 0.98 (d,  $J$  = 6.4 Hz, 3H), 0.872 (d,  $J$  = 6.7 Hz, 3H), 0.867 (d,  $J$  = 6.7 Hz, 3H), 0.85 (s, 3H)

$^{13}\text{C}$  NMR (125 MHz,  $\text{CDCl}_3$ ):  $\delta$  206.9, 166.0, 139.9, 132.8, 130.8, 129.5 (2C), 128.3 (2C), 122.1, 74.2, 67.9, 50.9, 49.9, 43.2, 39.2, 38.9, 38.0, 36.8, 35.9, 31.8, 31.3, 30.9, 30.8, 29.7, 27.9, 27.8, 25.0, 22.8, 22.6, 20.5, 19.4, 18.7, 13.7

HRMS-ESI ( $m/z$ ):  $[\text{M}+\text{Na}]^+$  calcd for  $\text{C}_{34}\text{H}_{48}\text{O}_3\text{Na}$  527.3496, found 527.3502.

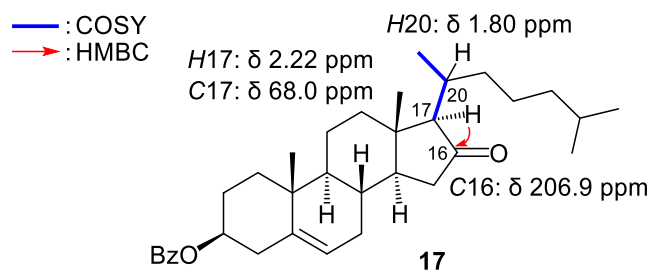

**Figure S14.** Characteristic HMBC and COSY correlations for structural determination of 17

### 2-3: Deprotection of 3-Bz-cholesterols

Compound **18** (25-hydroxy cholesterol)

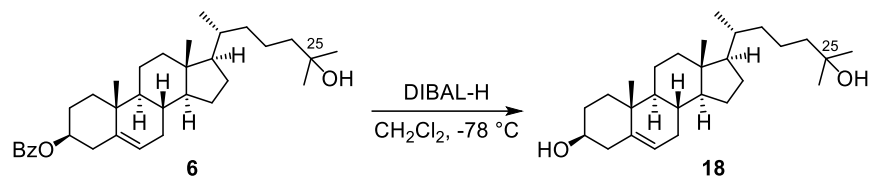

**General Procedure B** (Removal of Bz group with DIBAL-H): To a solution of **6** (9.2 mg, 18.2  $\mu$ mol, 1.0 equiv.) in  $\text{CH}_2\text{Cl}_2$  (360  $\mu$ L) was added 1 M DIBAL-H solution in toluene (90  $\mu$ L, 90  $\mu$ mol, 4 equiv.) at  $-78^\circ\text{C}$ . After stirring for 1 h, the solution was treated with aqueous saturated Rochelle salt (3 mL) and stirred for 30 min at room temperature. The water layer was extracted with AcOEt (2 x 5 mL). The combined organic layers were dried over  $\text{Na}_2\text{SO}_4$ , filtered, and concentrated. The residue was purified by silica gel column chromatography (eluent: hexane/EtOAc 5/1 to 1/1) to give **18** (6.6 mg, 90%).

**$^1\text{H}$  NMR (500 MHz,  $\text{CDCl}_3$ ):**  $\delta$  5.35 (d,  $J = 5.2$  Hz, 1H), 3.55–3.49 (m, 1H), 2.31–2.20 (m, 2H), 2.04–1.94 (m, 2H), 1.86–1.79 (m, 3H), 1.61–1.33 (m, 12H), 1.30–1.18 (m, 2H), 1.21 (s, 6H), 1.16–0.97 (m, 5H), 1.01 (s, 3H), 0.93 (d,  $J = 6.7$  Hz, 3H), 0.95–0.90 (m, 1H), 0.68 (s, 3H)

**$^{13}\text{C}$  NMR (125 MHz,  $\text{CDCl}_3$ ):**  $\delta$  140.9, 121.8, 72.0, 71.3, 56.9, 56.2, 50.3, 44.6, 42.5, 42.5, 39.9, 37.4, 36.7, 36.6, 35.9, 32.1 (2C), 31.8, 29.5, 29.3, 28.4, 24.4, 21.2, 20.9, 19.6, 18.8, 12.0

Compound **19** (20-hydroxy cholesterol)

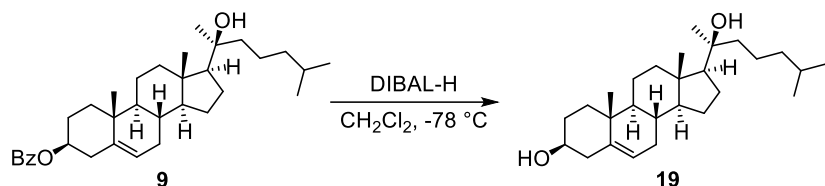

**General Procedure B** was followed for compound **9** (10.9 mg, 21.5  $\mu$ mol). The crude mixture was purified by silica gel column chromatography (eluent: hexane/EtOAc 2/1) followed by GPC (eluent: chloroform) to give **19** (7.2 mg, 83%).

**$^1\text{H}$  NMR (500 MHz,  $\text{CDCl}_3$ ):**  $\delta$  5.35 (d,  $J = 5.4$  Hz, 1H), 3.53 (s, 1H), 2.32–2.23 (m, 2H), 2.09 (d,  $J = 12.2$  Hz, 1H), 1.98 (d,  $J = 17.1$  Hz, 1H), 1.86–1.83 (m, 2H), 1.77–1.62 (m, 3H), 1.52–1.40 (m, 7H), 1.27 (s, 3H), 1.34–1.07 (m, 9H), 1.05–0.97 (m, 1H), 1.01 (s, 3H), 0.95–0.90 (m, 1H), 0.87 (d,  $J = 6.8$  Hz, 6H), 0.87 (s, 3H)

**$^{13}\text{C}$  NMR (126 MHz,  $\text{CDCl}_3$ ):**  $\delta$  140.9, 121.8, 75.4, 71.9, 57.9, 57.0, 50.2, 44.3, 42.8, 42.4, 40.3, 39.8, 37.4, 36.7, 31.9, 31.8, 31.5, 28.1, 26.6, 23.9, 22.9, 22.7, 22.5, 22.2, 21.1, 19.5, 13.8

Compound **20** (17-hydroxy cholesterol)

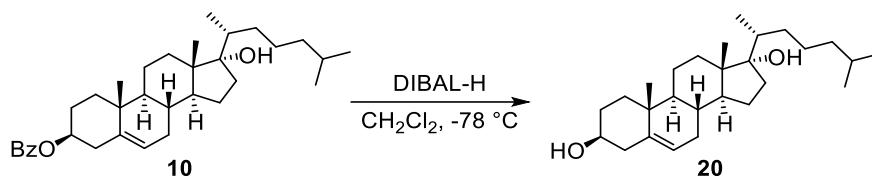

**General Procedure B** was followed for compound **10** (4.0 mg, 7.9  $\mu$ mol). The crude mixture was purified by silica gel column chromatography (eluent: hexane/EtOAc 5/1 to 0/1) to give **20** (2.8 mg, 88%).

**$^1\text{H}$  NMR (500 MHz,  $\text{CDCl}_3$ ):**  $\delta$  5.35 (d,  $J$  = 5.2 Hz, 1H), 3.53 (m, 1H), 2.31–2.23 (m, 2H), 1.98 (dd,  $J$  = 17.4, 2.7 Hz, 1H), 1.87–1.79 (m, 3H), 1.72–1.60 (m, 7H), 1.54–1.40 (m, 6H), 1.19–1.06 (m, 6H), 1.02 (s, 3H), 0.96 (td,  $J$  = 11.6, 4.4 Hz, 1H), 0.90 (d,  $J$  = 6.7 Hz, 3H), 0.87 (dd,  $J$  = 6.7, 2.7 Hz, 6H), 0.77 (s, 3H)

**$^{13}\text{C}$  NMR (126 MHz,  $\text{CDCl}_3$ ):**  $\delta$  140.8, 121.9, 86.7, 71.9, 51.3, 49.9, 47.4, 42.4, 39.9, 39.5, 38.2, 37.4, 36.6, 32.5, 32.5, 32.4, 32.1, 31.8, 28.1, 25.8, 23.9, 22.9, 22.7, 21.0, 19.5, 14.5, 14.2

Compound **21** (14-hydroxy cholesterol)

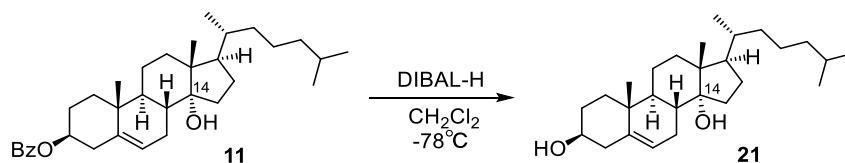

**General Procedure B** was followed for compound **11** (8.1 mg, 16.0  $\mu$ mol). The crude mixture was purified by silica gel column chromatography (eluent: hexane/EtOAc 5/1 to 1/1) to give **21** (4.0 mg, 62%).

**$^1\text{H}$  NMR (500 MHz,  $\text{CDCl}_3$ ):**  $\delta$  5.38 (s, 1H), 3.53–3.50 (m, 1H), 2.32–2.20 (m, 2H), 2.13–2.07 (m, 1H), 2.01–1.93 (m, 1H), 1.89–1.83 (m, 4H), 1.73 (dd,  $J$  = 22.0, 8.8 Hz, 3H), 1.56–1.32 (m, 12H), 1.15–1.12 (m, 4H), 1.03 (s, 3H), 0.90 (d,  $J$  = 6.8 Hz, 3H), 0.87 (dd,  $J$  = 6.8, 2.0 Hz, 6H), 0.83 (s, 3H)

**$^{13}\text{C}$  NMR (125 MHz,  $\text{CDCl}_3$ ):**  $\delta$  140.3, 121.9, 85.3, 71.8, 51.3, 46.6, 43.5, 42.4, 39.7, 37.5, 36.9, 36.5, 35.8, 34.9, 32.7, 31.9, 31.8, 28.2, 27.3, 26.0, 24.2, 23.0, 22.7, 20.0, 19.4, 18.8, 15.6

Compound **22** (14,25-dihydroxy cholesterol)

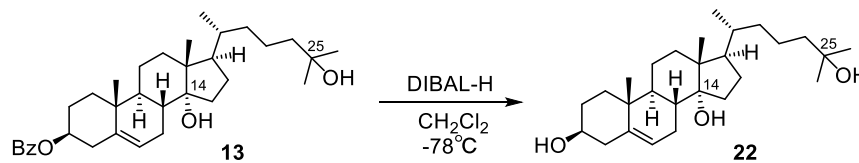

**General Procedure B** was followed for compound **13** (8.8 mg, 16.8  $\mu$ mol). The crude mixture was purified by silica gel column chromatography (eluent: hexane/EtOAc 3/1 to 0/1) to give **22** (6.5 mg, 91%).

**$^1\text{H}$  NMR (500 MHz,  $\text{CDCl}_3$ ):**  $\delta$  5.38 (s, 1H), 3.54–3.50 (m, 1H), 2.32–2.20 (m, 2H), 2.10–2.06 (m, 1H), 1.99–1.95 (m, 1H), 1.89–1.79 (m, 4H), 1.78–1.70 (m, 3H), 1.51–1.32 (m, 12H), 1.21 (s, 6H), 1.27–1.07 (m, 3H), 1.03 (s, 3H), 0.91 (d,  $J$  = 6.3 Hz, 3H), 0.83 (s, 3H)

**$^{13}\text{C}$  NMR (125 MHz,  $\text{CDCl}_3$ ):**  $\delta$  140.3, 121.9, 85.3, 71.8, 71.3, 51.3, 46.7, 44.5, 43.5, 42.4, 37.5, 36.9, 36.8, 35.8, 34.9, 32.7, 31.9, 31.8, 29.5, 29.4, 27.3, 26.0, 21.2, 20.0, 19.4, 18.8, 15.6

Compound **23** (17,25-dihydroxy cholesterol)

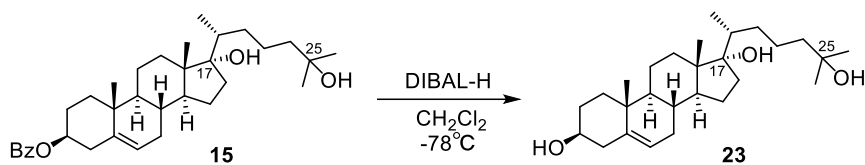

**General Procedure B** was followed for compound **15** (7.4 mg, 14.2  $\mu$ mol). The crude mixture was purified by silica gel column chromatography (eluent: hexane/EtOAc 3/1 to 1/2) to give **22** (5.6 mg, 93%).

**<sup>1</sup>H NMR (500 MHz, CDCl<sub>3</sub>):**  $\delta$  5.35 (d,  $J$  = 5.4 Hz, 1H), 3.55–3.50 (m, 1H), 2.31–2.20 (m, 2H), 2.00–1.96 (m, 1H), 1.86–1.79 (m, 3H), 1.71–1.65 (m, 5H), 1.63–1.58 (m, 3H), 1.51–1.38 (m, 7H), 1.27–1.17 (m, 3H), 1.21 (s, 6H), 1.15–1.05 (m, 2H), 1.02 (s, 3H), 0.99–0.94 (m, 1H), 0.92 (d,  $J$  = 6.8 Hz, 3H), 0.77 (s, 3H)

**<sup>13</sup>C NMR (125 MHz, CDCl<sub>3</sub>):**  $\delta$  140.8, 121.8, 86.6, 71.1, 71.2, 51.3, 49.8, 47.4, 44.3, 42.4, 39.8, 38.2, 37.4, 36.6, 32.8, 32.5, 32.4, 32.0, 31.8, 29.5, 29.4, 23.9, 22.7, 21.0, 19.5, 14.5, 14.1

Compound **24** (20,25-dihydroxy cholesterol)

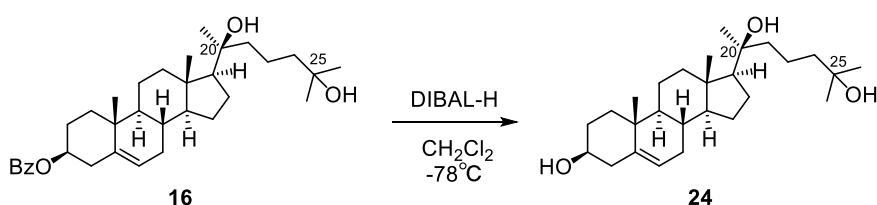

**General Procedure B** was followed for compound **16** (7.3 mg, 14.0  $\mu$ mol). The crude mixture was purified by silica gel column chromatography (eluent: hexane/EtOAc 2/1 to 0/1) to give **24** (4.9 mg, 84%).

**<sup>1</sup>H NMR (500 MHz, CDCl<sub>3</sub>):**  $\delta$  5.35 (d,  $J$  = 5.4 Hz, 1H), 3.54–3.50 (m, 1H), 2.31–2.23 (m, 2H), 2.09 (d,  $J$  = 12.7 Hz, 1H), 1.98 (d,  $J$  = 17.1 Hz, 1H), 1.86–1.83 (m, 2H), 1.77–1.42 (m, 13H), 1.40–1.34 (m, 2H), 1.29 (s, 3H), 1.22–1.19 (m, 2H), 1.22 (s, 6H), 1.16–1.04 (m, 2H), 1.01 (s, 3H), 0.95–0.88 (m, 1H), 0.86 (s, 3H)

**<sup>13</sup>C NMR (125 MHz, CDCl<sub>3</sub>):**  $\delta$  140.9, 121.7, 75.4, 71.9, 71.2, 58.0, 57.0, 50.2, 44.6, 44.3, 42.8, 42.4, 40.3, 37.4, 36.7, 31.9, 31.8, 31.5, 29.7, 29.4, 26.5, 23.9, 22.6, 21.1, 19.5, 19.1, 13.8



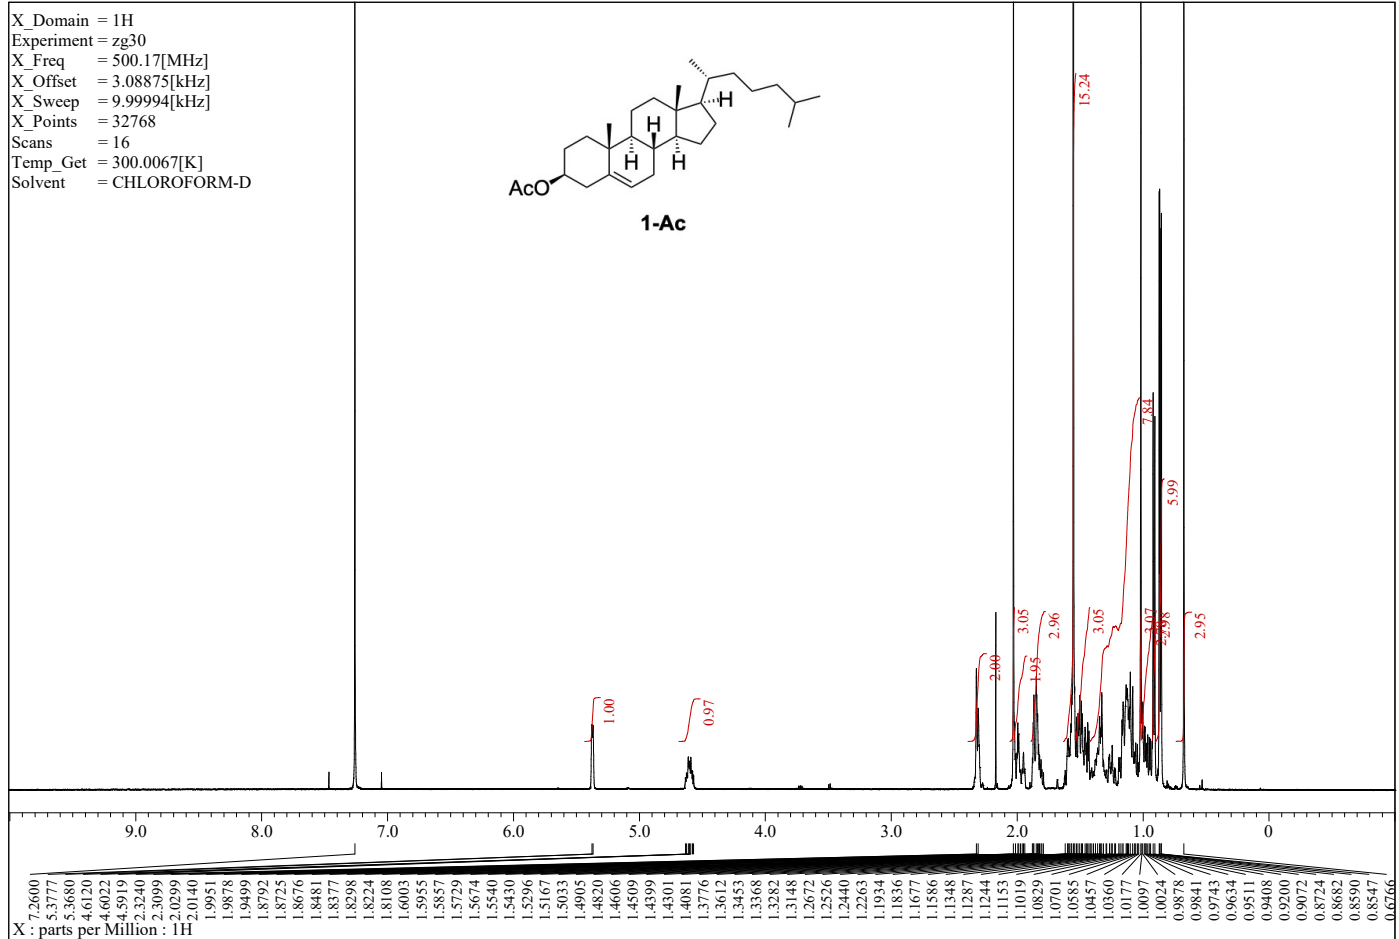

X\_Domain = 1H  
 Experiment = zg30  
 X\_Freq = 500.17[MHz]  
 X\_Offset = 3.08875[kHz]  
 X\_Sweep = 9.99994[kHz]  
 X\_Points = 32768  
 Scans = 16  
 Temp\_Get = 300.1421[K]  
 Solvent = CHLOROFORM-D

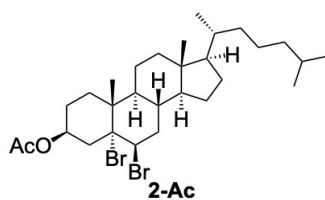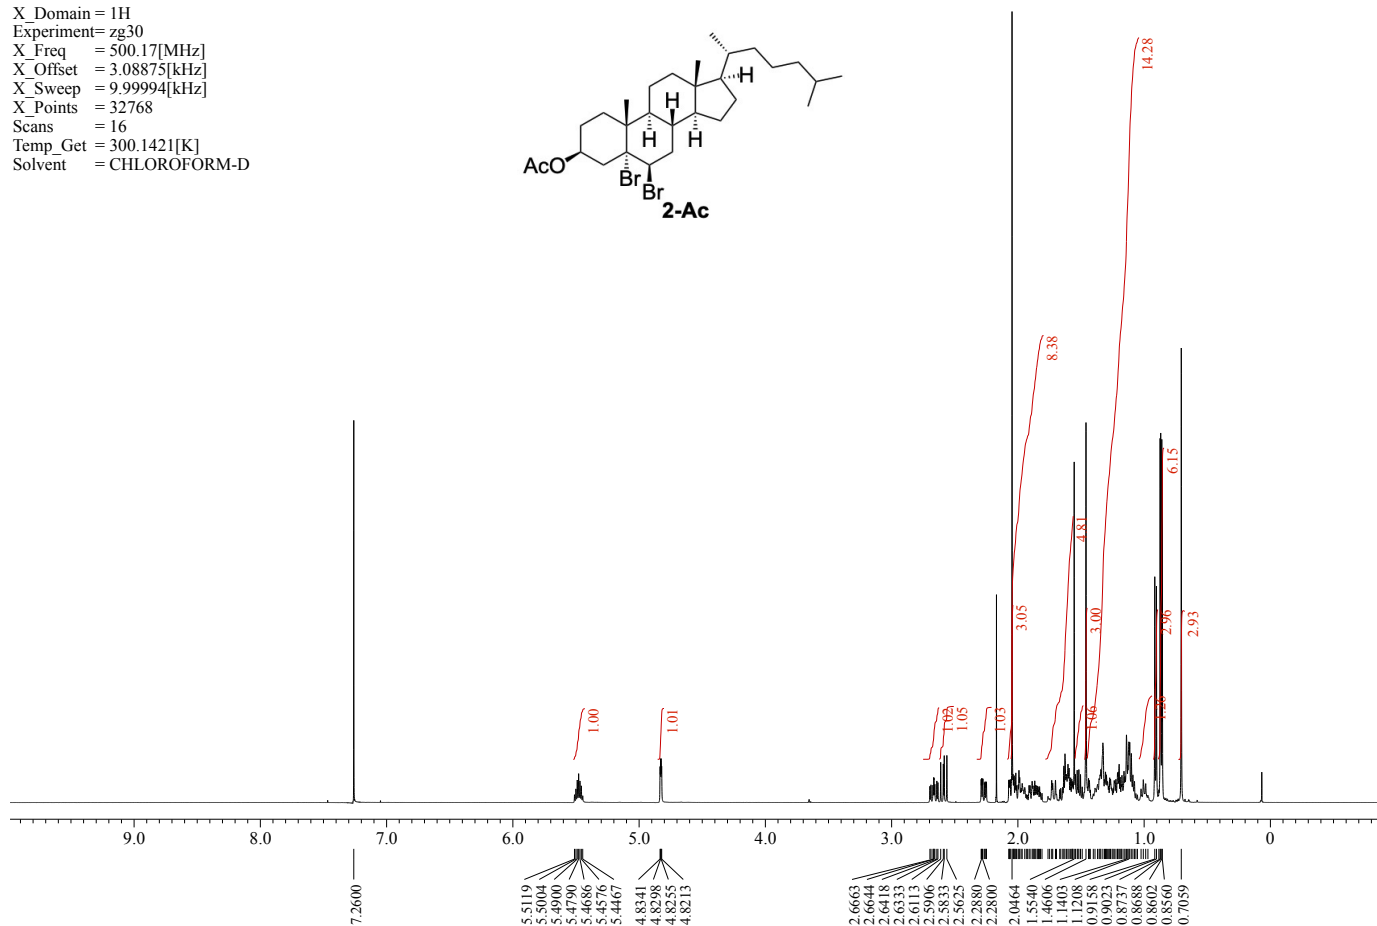

X\_Domain = 13C  
 Experiment = zgpg30  
 X\_Freq = 125.76785[MHz]  
 X\_Offset = 12.57573[kHz]  
 X\_Sweep = 29.75893[kHz]  
 X\_Points = 32768  
 Scans = 3000  
 Temp\_Get = 300.1804[K]  
 Solvent = CHLOROFORM-D

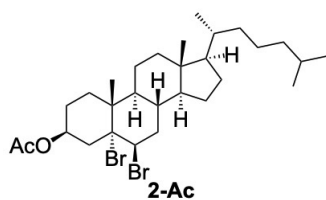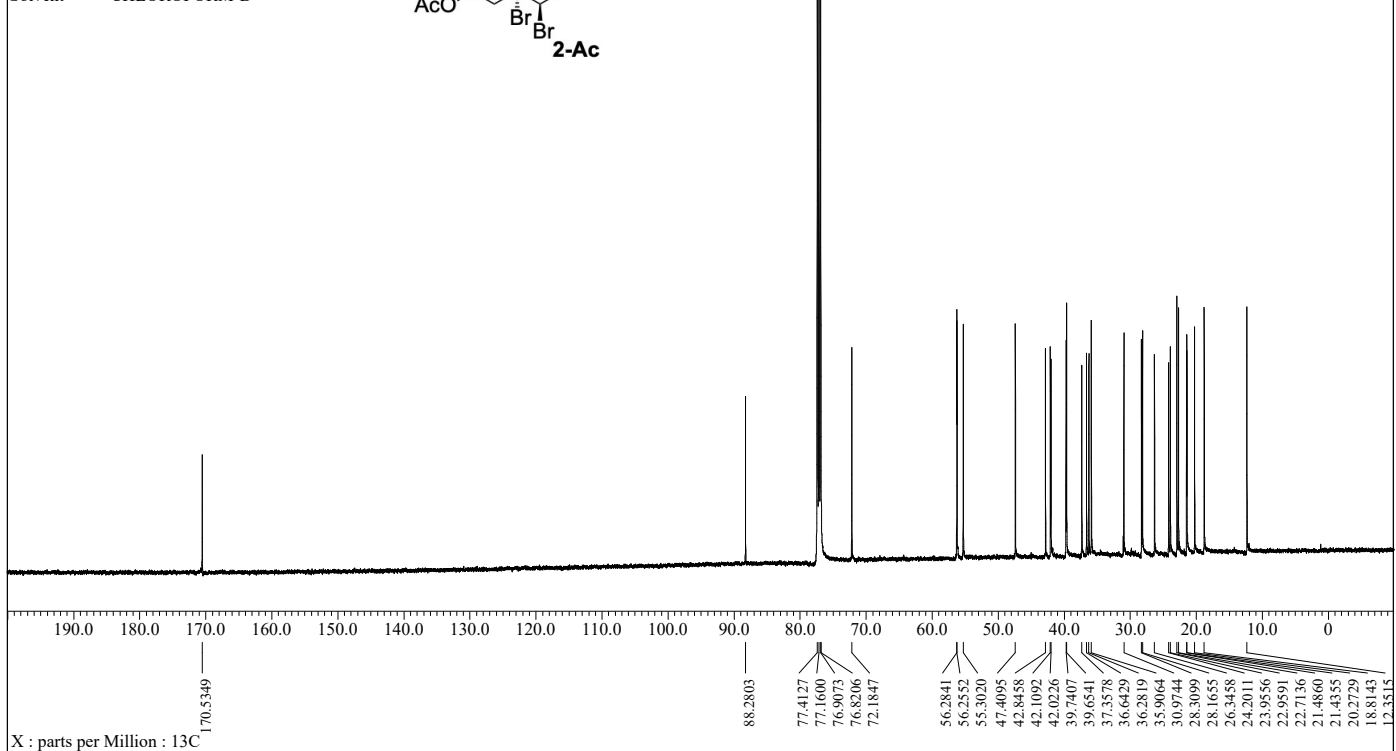

X\_Domain = 1H  
 Experiment = zg30  
 X\_Freq = 500.17[MHz]  
 X\_Offset = 3.08875[kHz]  
 X\_Sweep = 9.99994[kHz]  
 X\_Points = 32768  
 Scans = 16  
 Temp\_Get = 300.1389[K]  
 Solvent = CHLOROFORM-D

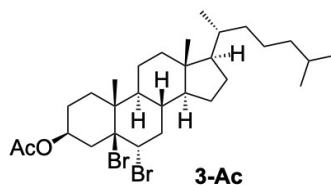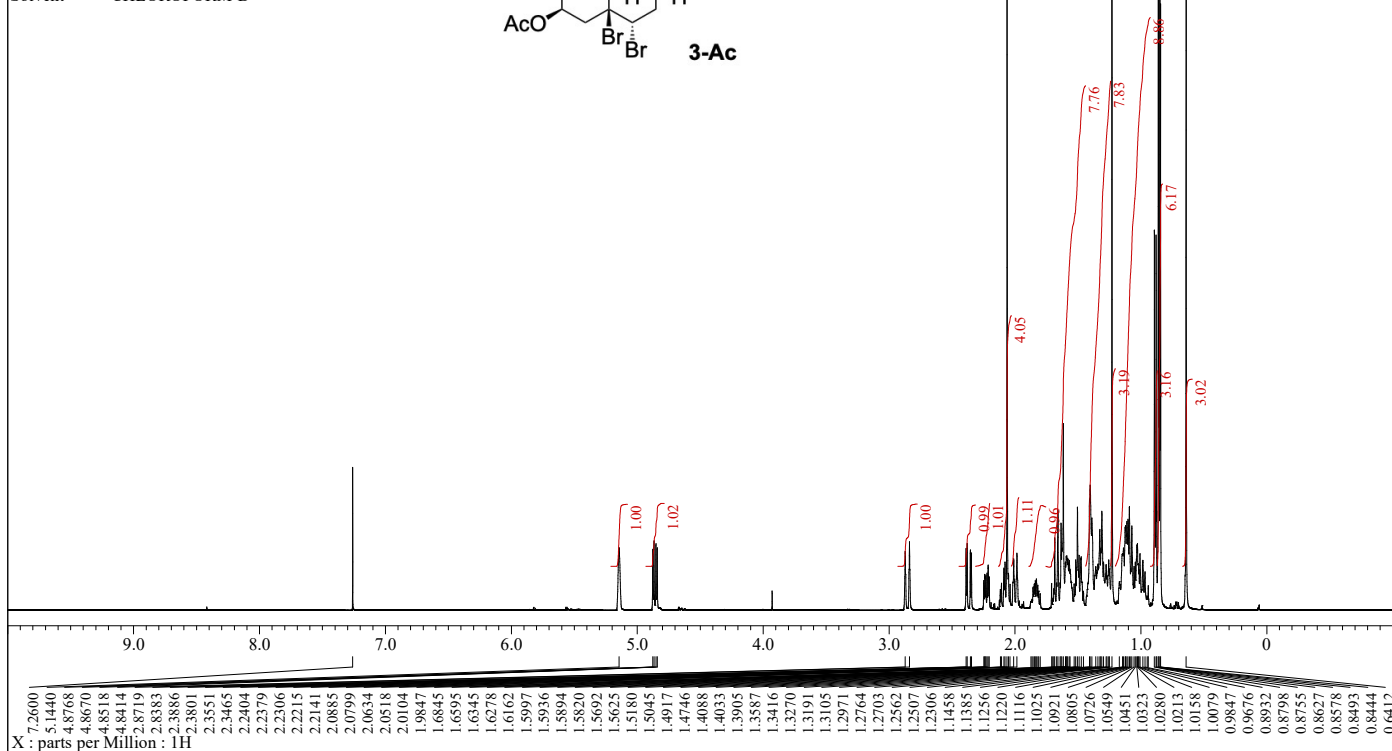

X\_Domain = 13C  
 Experiment= zgpg30  
 X\_Freq = 125.76785[MHz]  
 X\_Offset = 12.57628[kHz]  
 X\_Sweep = 29.75893[kHz]  
 X\_Points = 32768  
 Scans = 64  
 Temp\_Get = 300.1566[K]  
 Solvent = CHLOROFORM-D

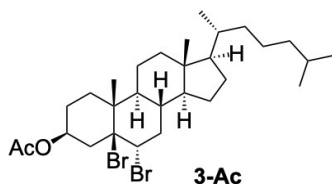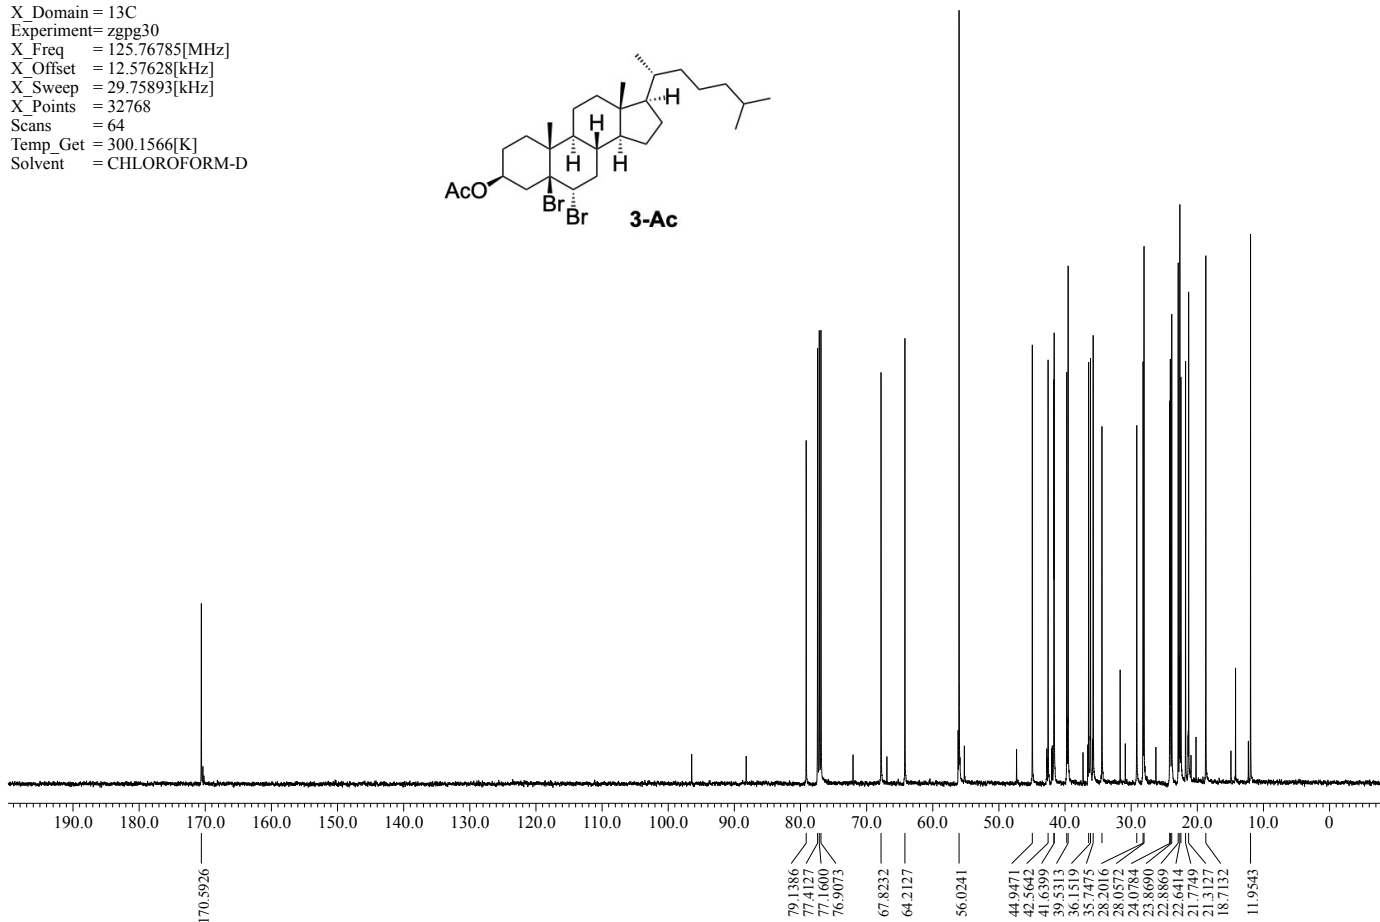

X\_Domain = 1H  
 Experiment= s2pul  
 X\_Freq = 499.72511[MHz]  
 X\_Offset = 2.99838[kHz]  
 X\_Sweep = 7.9952[kHz]  
 Scans = 8  
 Temp\_Get = 29[dC]  
 Solvent = cdcl3

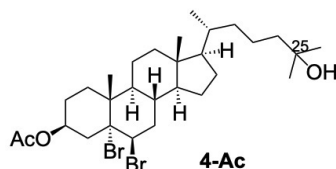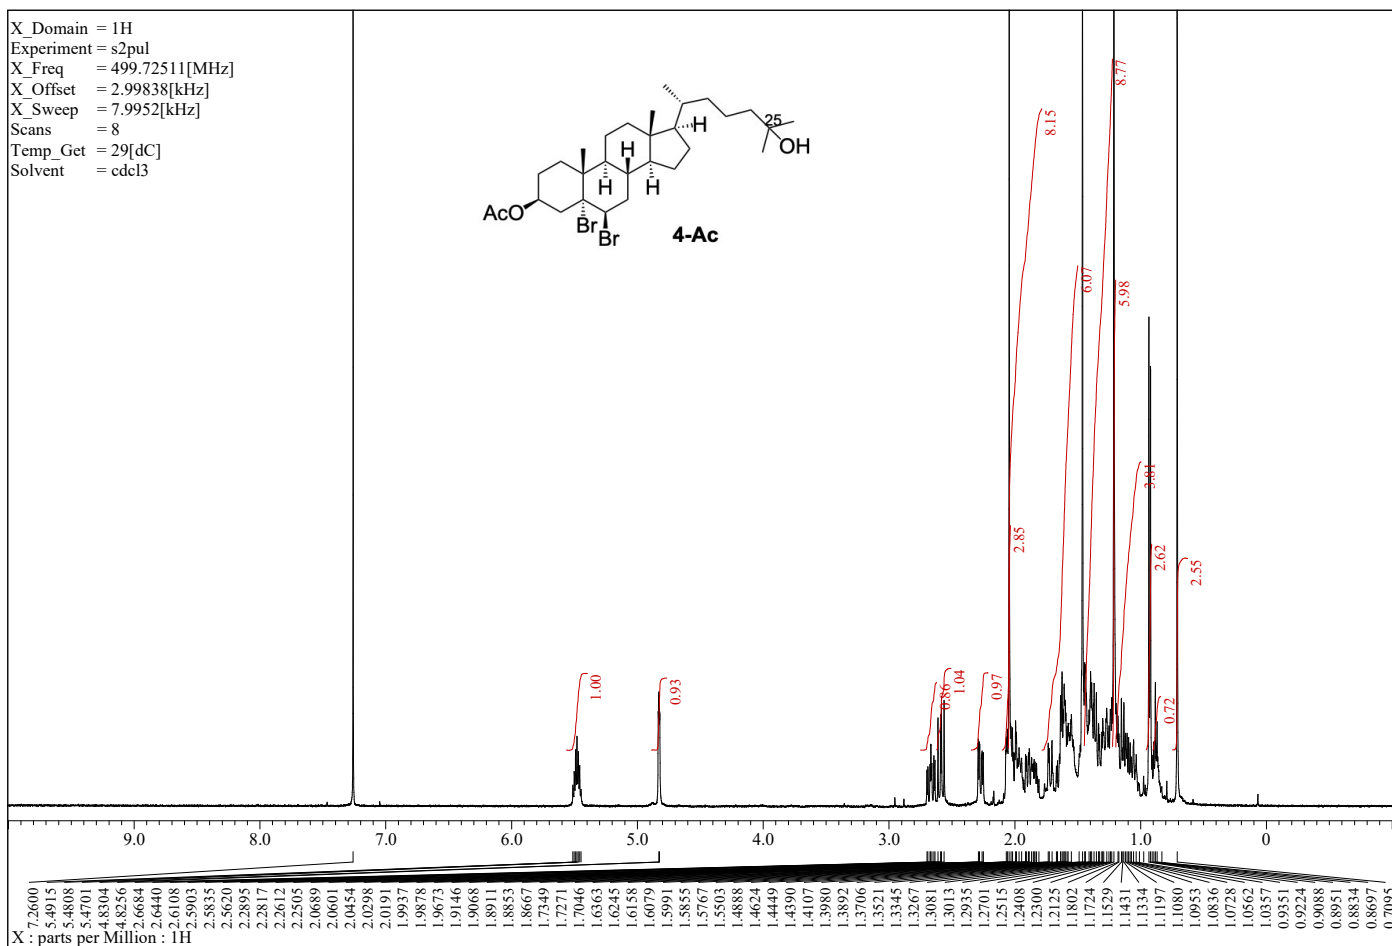

X\_Domain = 1H  
 Experiment = s2pul  
 X\_Freq = 499.72511[MHz]  
 X\_Offset = 2.99838[kHz]  
 X\_Sweep = 7.9952[kHz]  
 Scans = 8  
 Temp\_Get = 29[dC]  
 Solvent = cdcl3

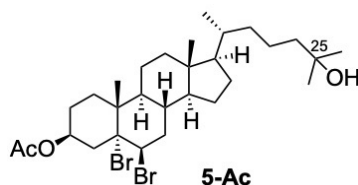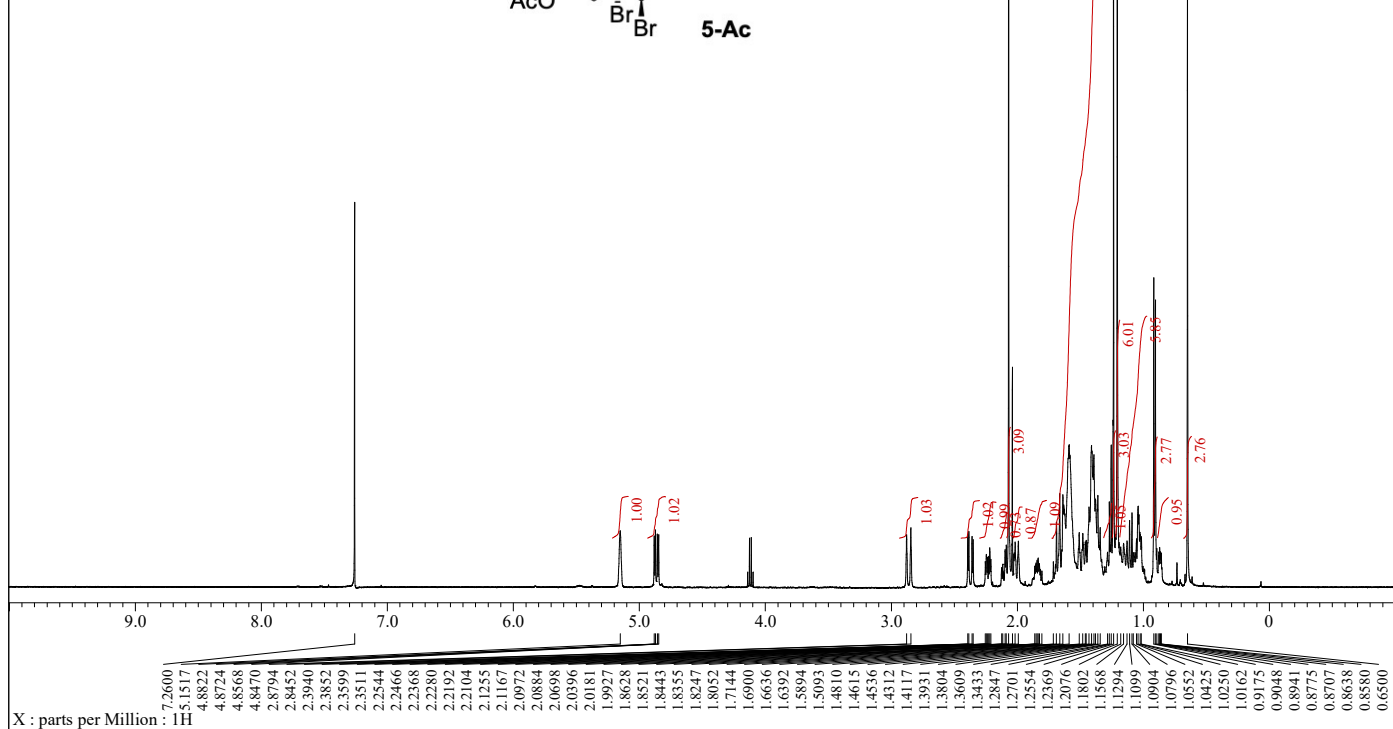

X\_Domain = 1H  
 Experiment = s2pul  
 X\_Freq = 499.72511[MHz]  
 X\_Offset = 2.99838[kHz]  
 X\_Sweep = 7.9952[kHz]  
 Scans = 8  
 Temp\_Get = 29[dC]  
 Solvent = cdcl3

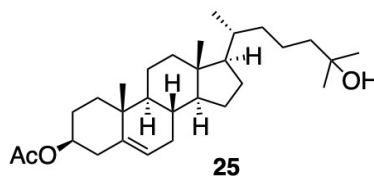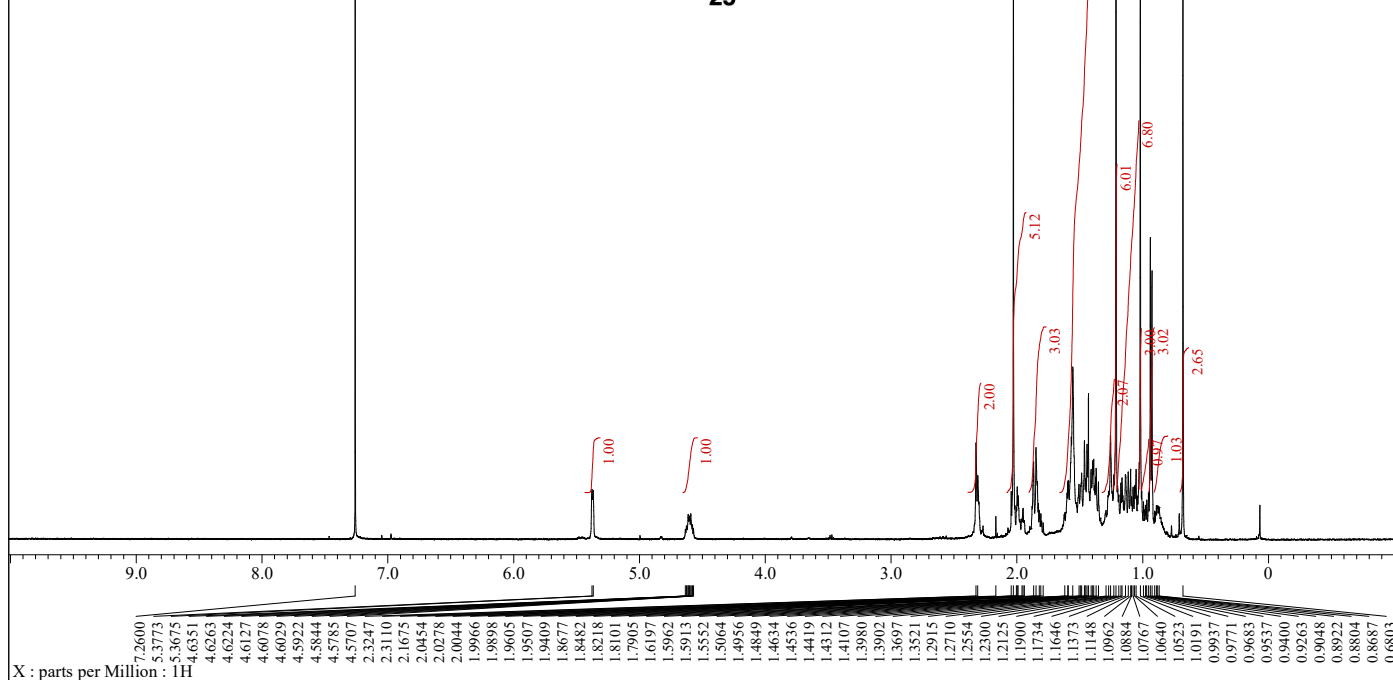

X\_Domain = 13C  
 Experiment = zgpg30  
 X\_Freq = 125.76785[MHz]  
 X\_Offset = 12.57628[kHz]  
 X\_Sweep = 29.75893[kHz]  
 X\_Points = 32768  
 Scans = 256  
 Temp\_Get = 300.0075[K]  
 Solvent = CHLOROFORM-D

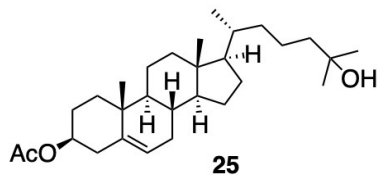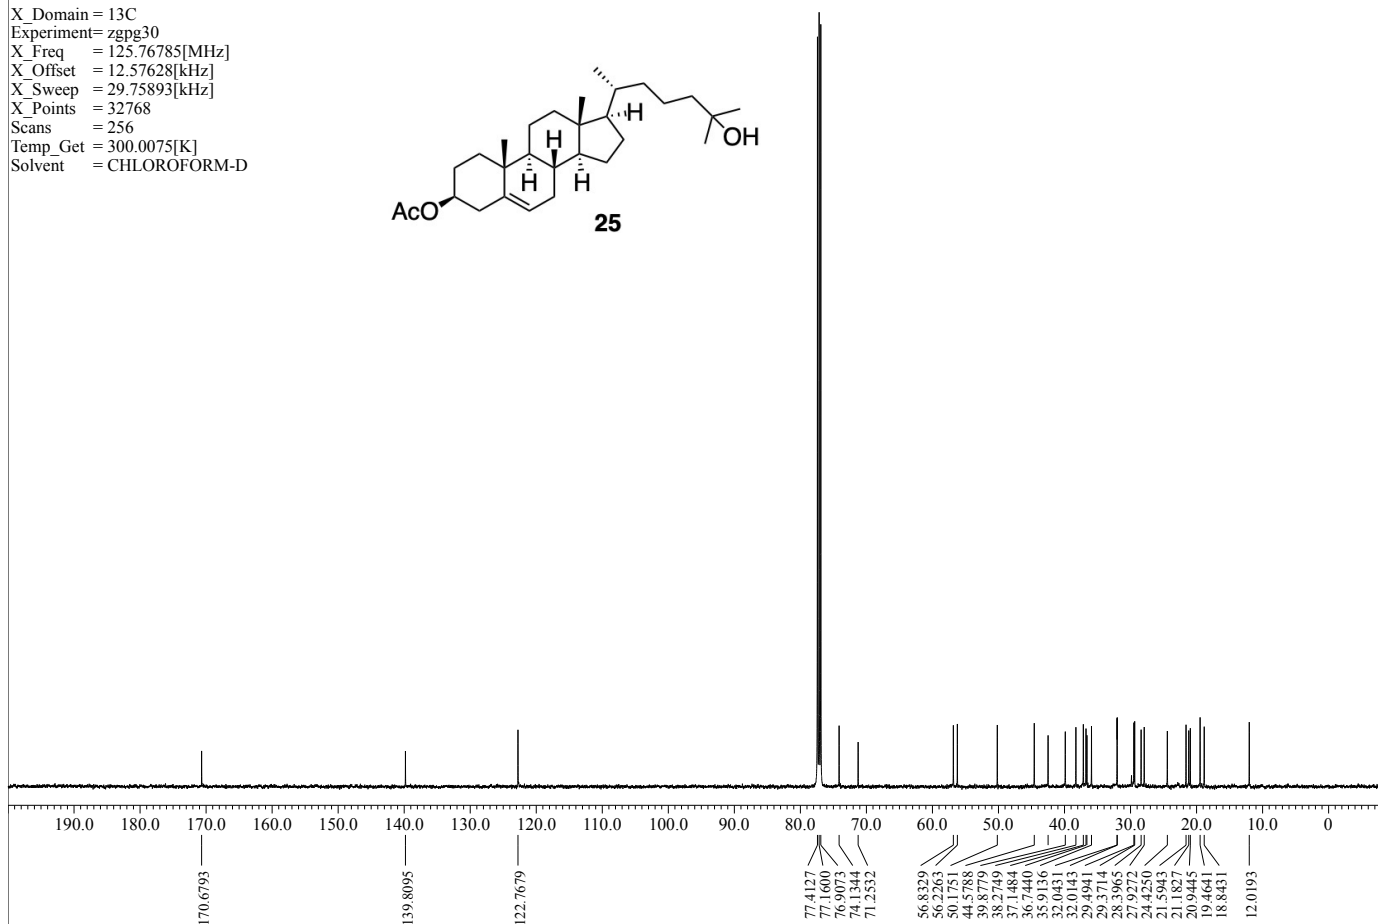

X\_Domain = 1H  
 Experiment = zg30  
 X\_Freq = 500.17[MHz]  
 X\_Offset = 3.08875[kHz]  
 X\_Sweep = 9.99994[kHz]  
 X\_Points = 32768  
 Scans = 16  
 Temp\_Get = 299.9866[K]  
 Solvent = CHLOROFORM-D

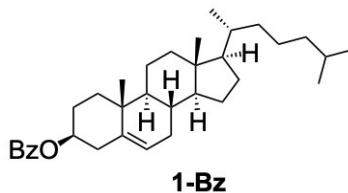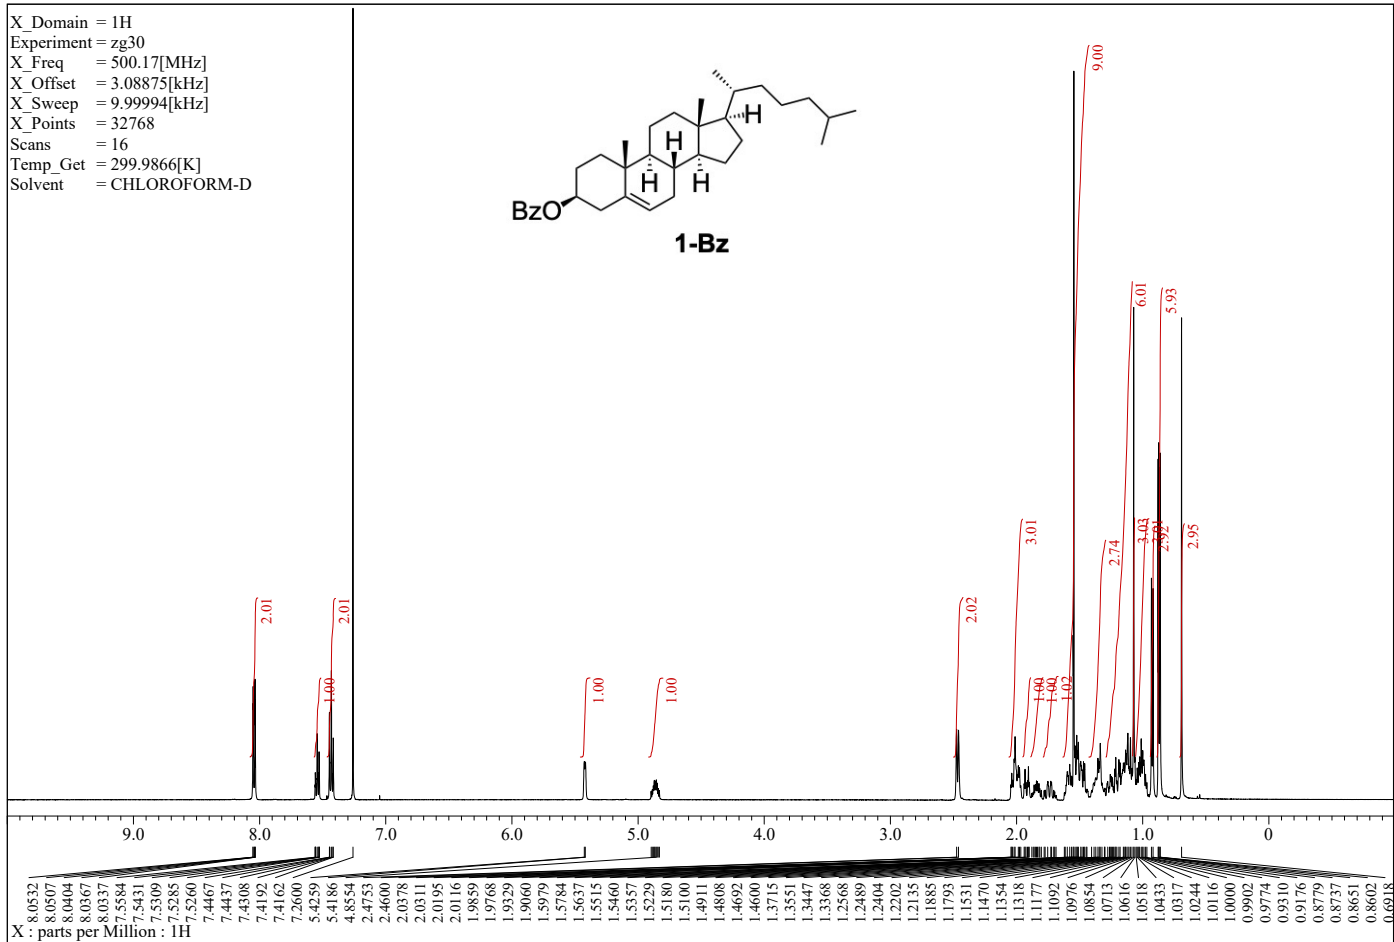

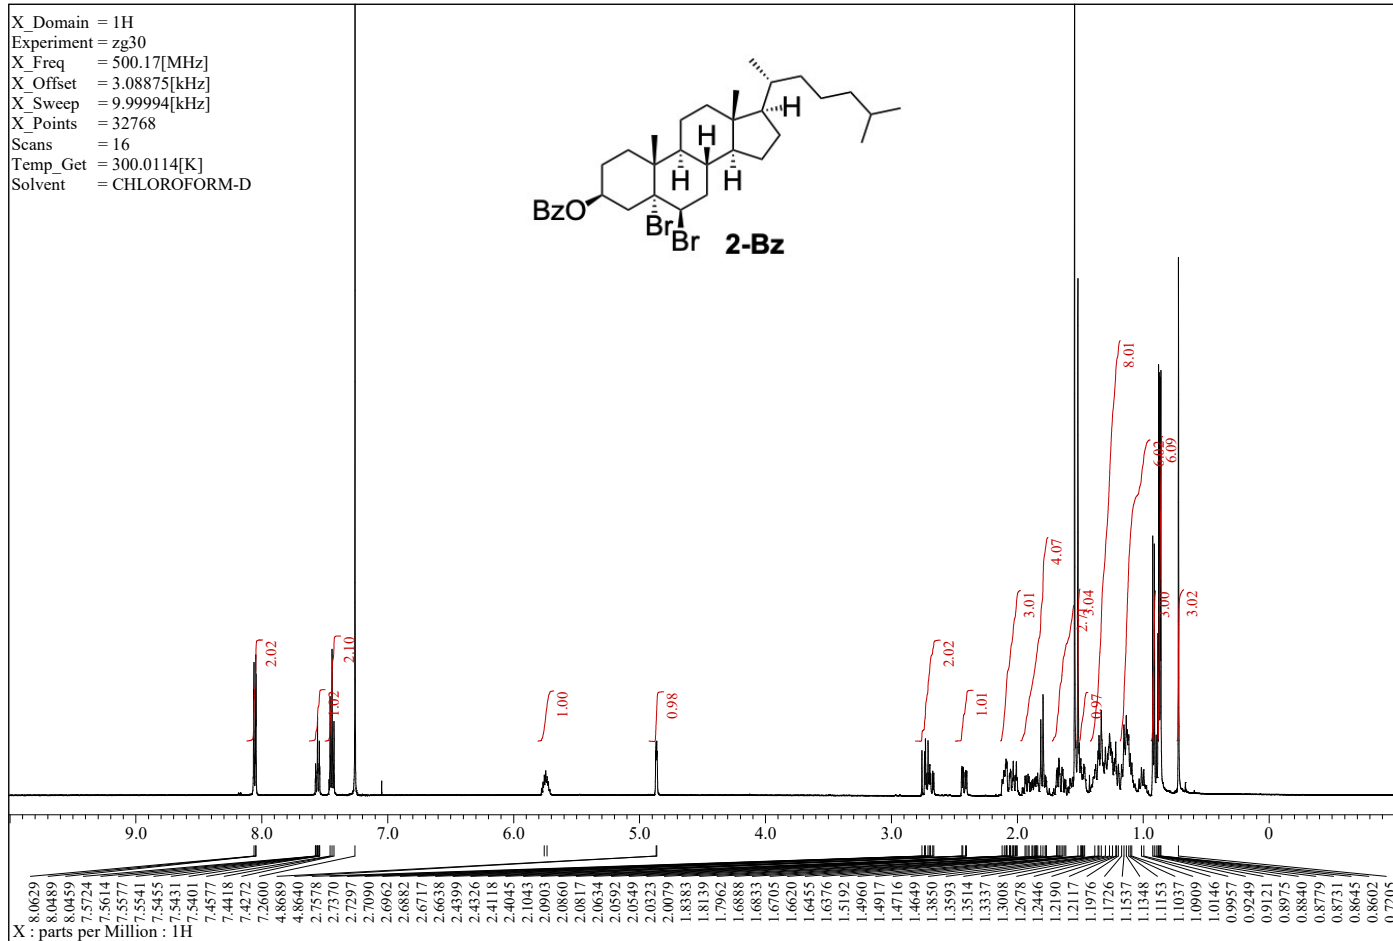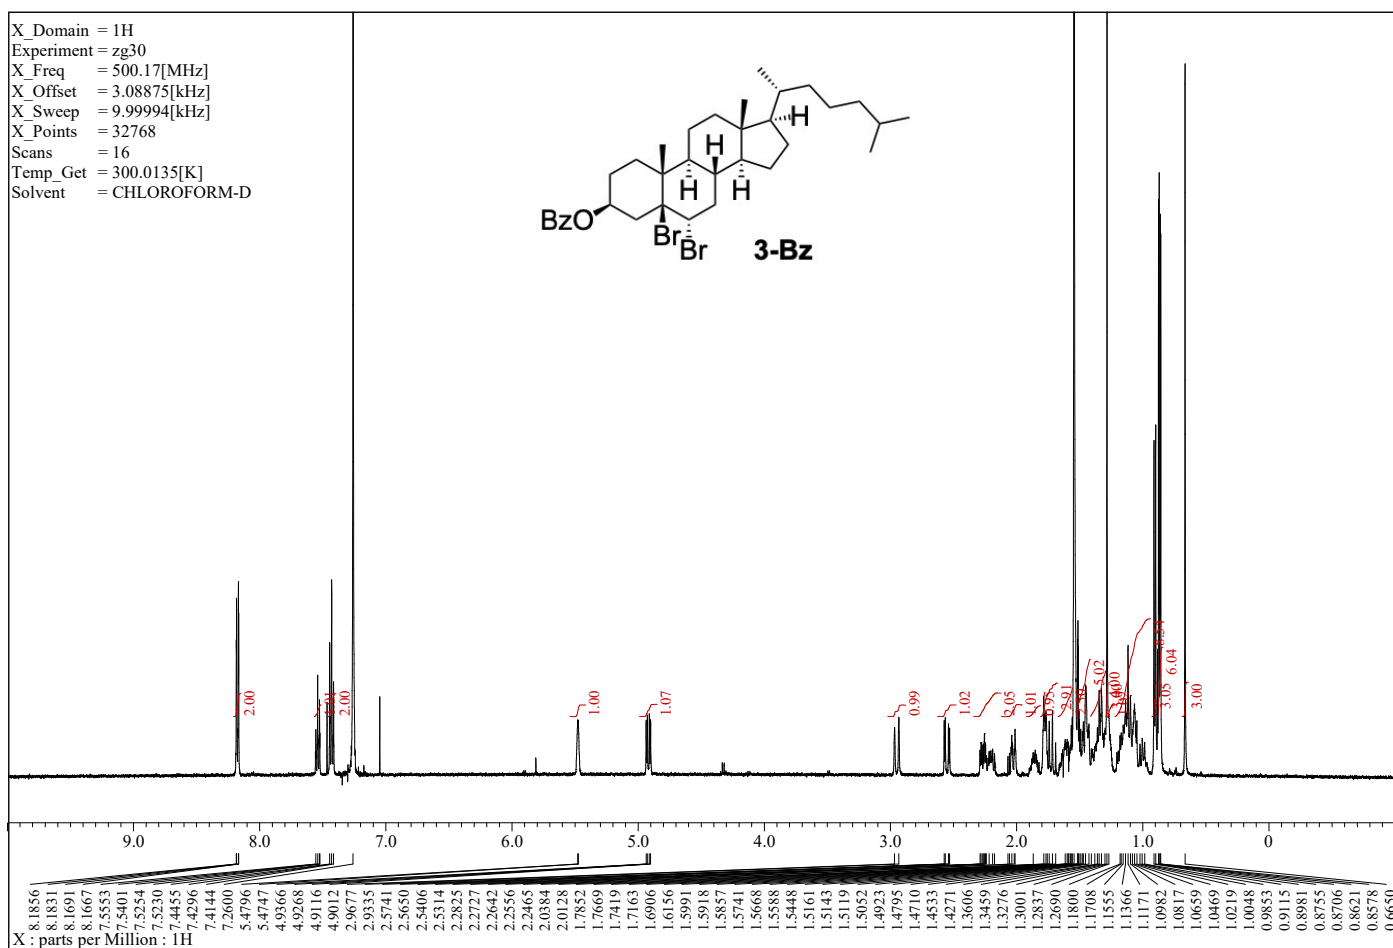

X\_Domain = 1H  
 Experiment = s2pul  
 X\_Freq = 499.71794[MHz]  
 X\_Offset = 2.99827[kHz]  
 X\_Sweep = 7.9952[kHz]  
 Scans = 32  
 Temp\_Get = 29[dC]  
 Solvent = cdcl3

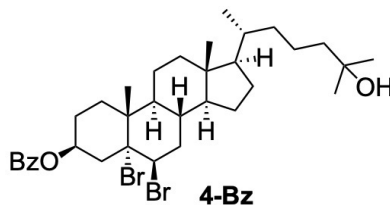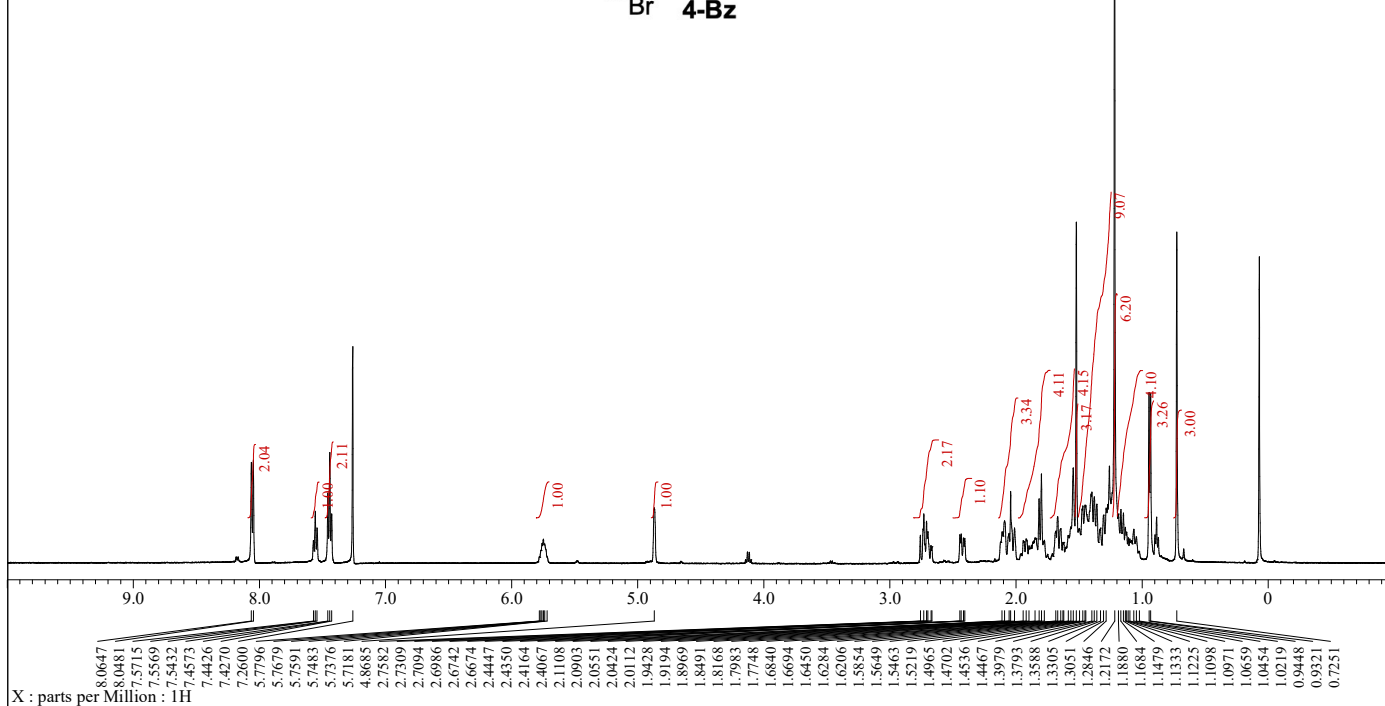

X\_Domain = 13C  
 Experiment = zgpg30  
 X\_Freq = 125.76785[MHz]  
 X\_Offset = 12.57632[kHz]  
 X\_Sweep = 29.75893[kHz]  
 X\_Points = 32768  
 Scans = 142  
 Temp\_Get = 300.014[K]  
 Solvent = CHLOROFORM-D

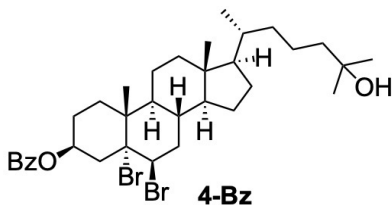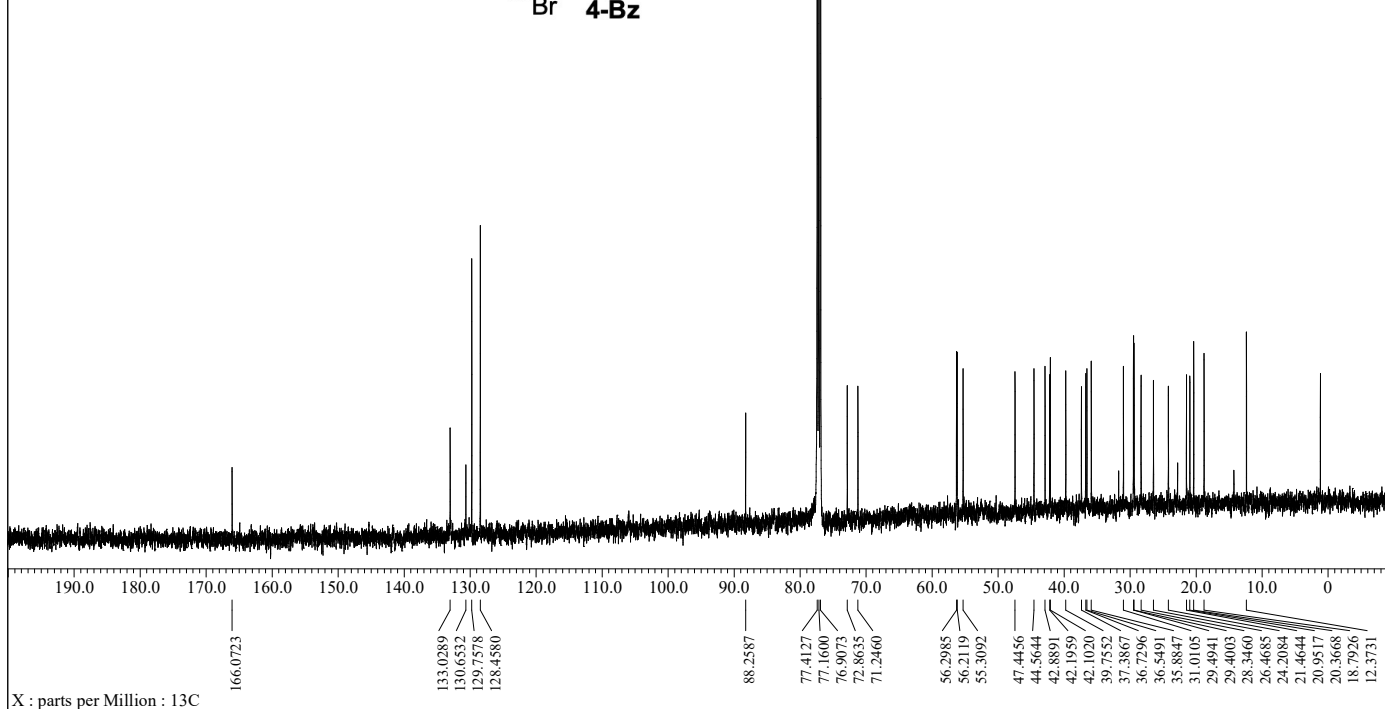

X\_Domain =  $^1\text{H}$   
 Experiment = s2pul  
 X\_Freq = 499.71794[MHz]  
 X\_Offset = 2.99827[kHz]  
 X\_Sweep = 7.9952[kHz]  
 Scans = 32  
 Temp\_Get = 29[dC]  
 Solvent =  $\text{cdcl}_3$

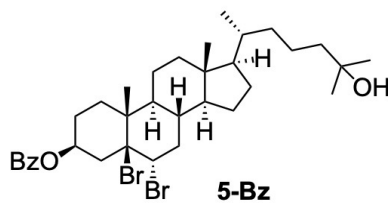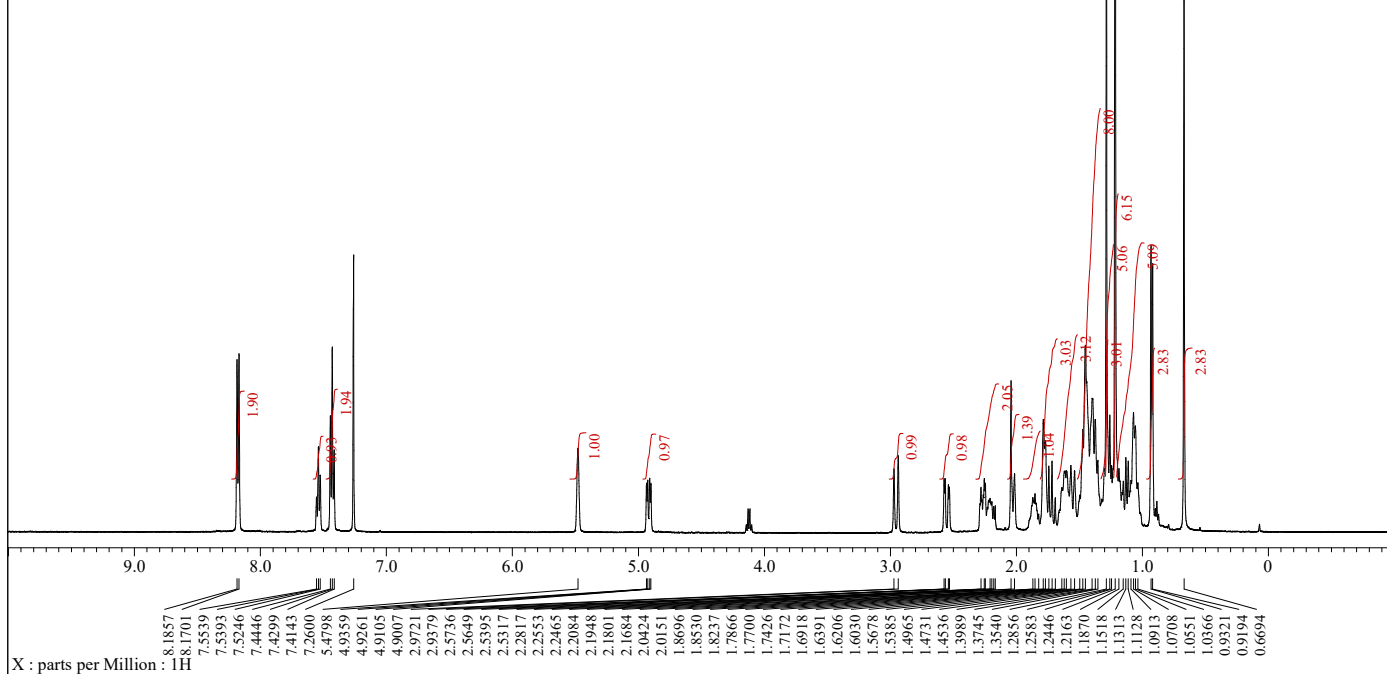

X : parts per Million :  $^1\text{H}$

X\_Domain =  $^{13}\text{C}$   
 Experiment = zgpg30  
 X\_Freq = 125.76785[MHz]  
 X\_Offset = 12.57632[kHz]  
 X\_Sweep = 29.75893[kHz]  
 X\_Points = 32768  
 Scans = 120  
 Temp\_Get = 300.0102[K]  
 Solvent =  $\text{CHLOROFORM-D}$

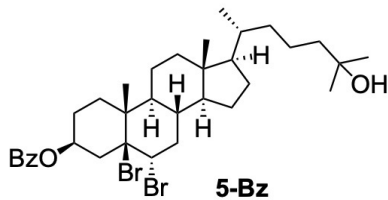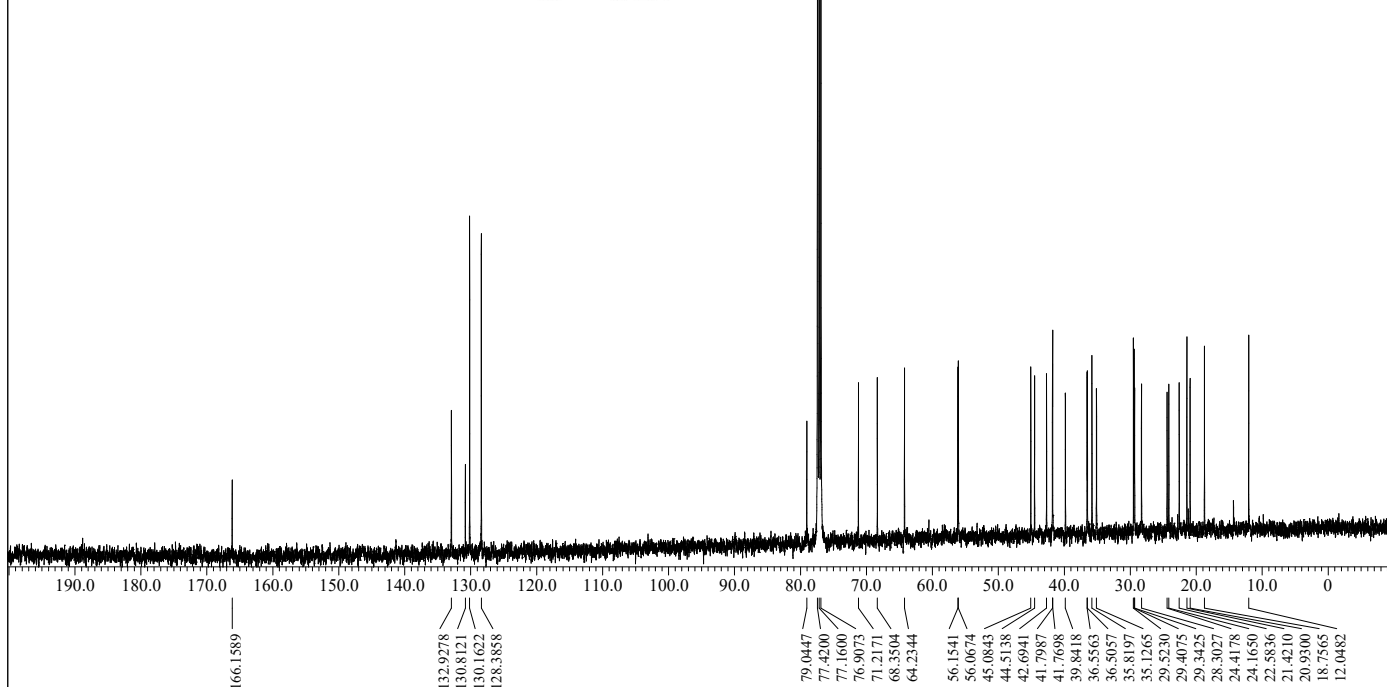

X : parts per Million :  $^{13}\text{C}$



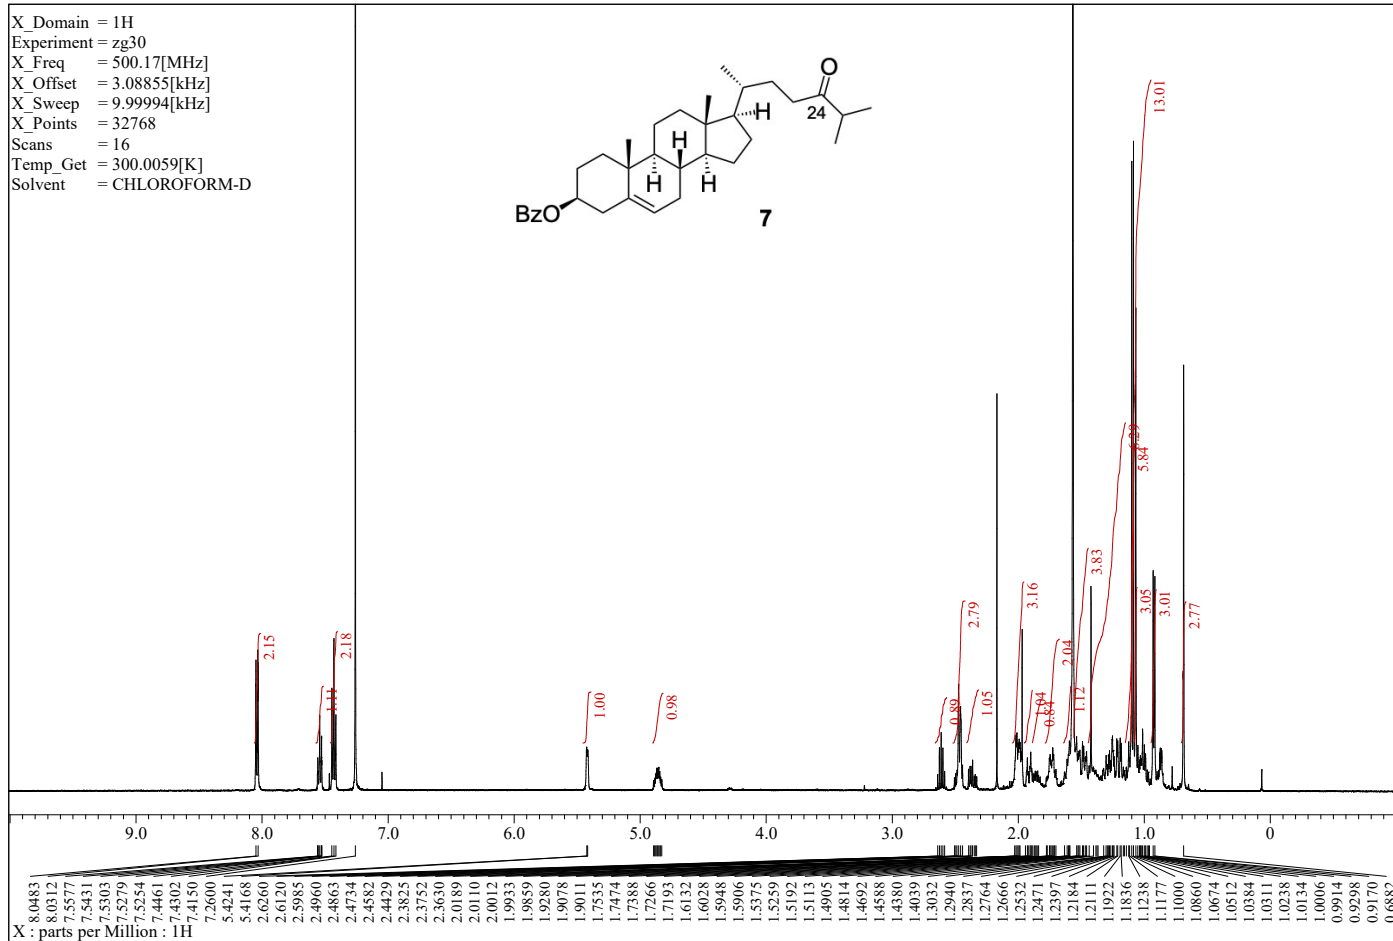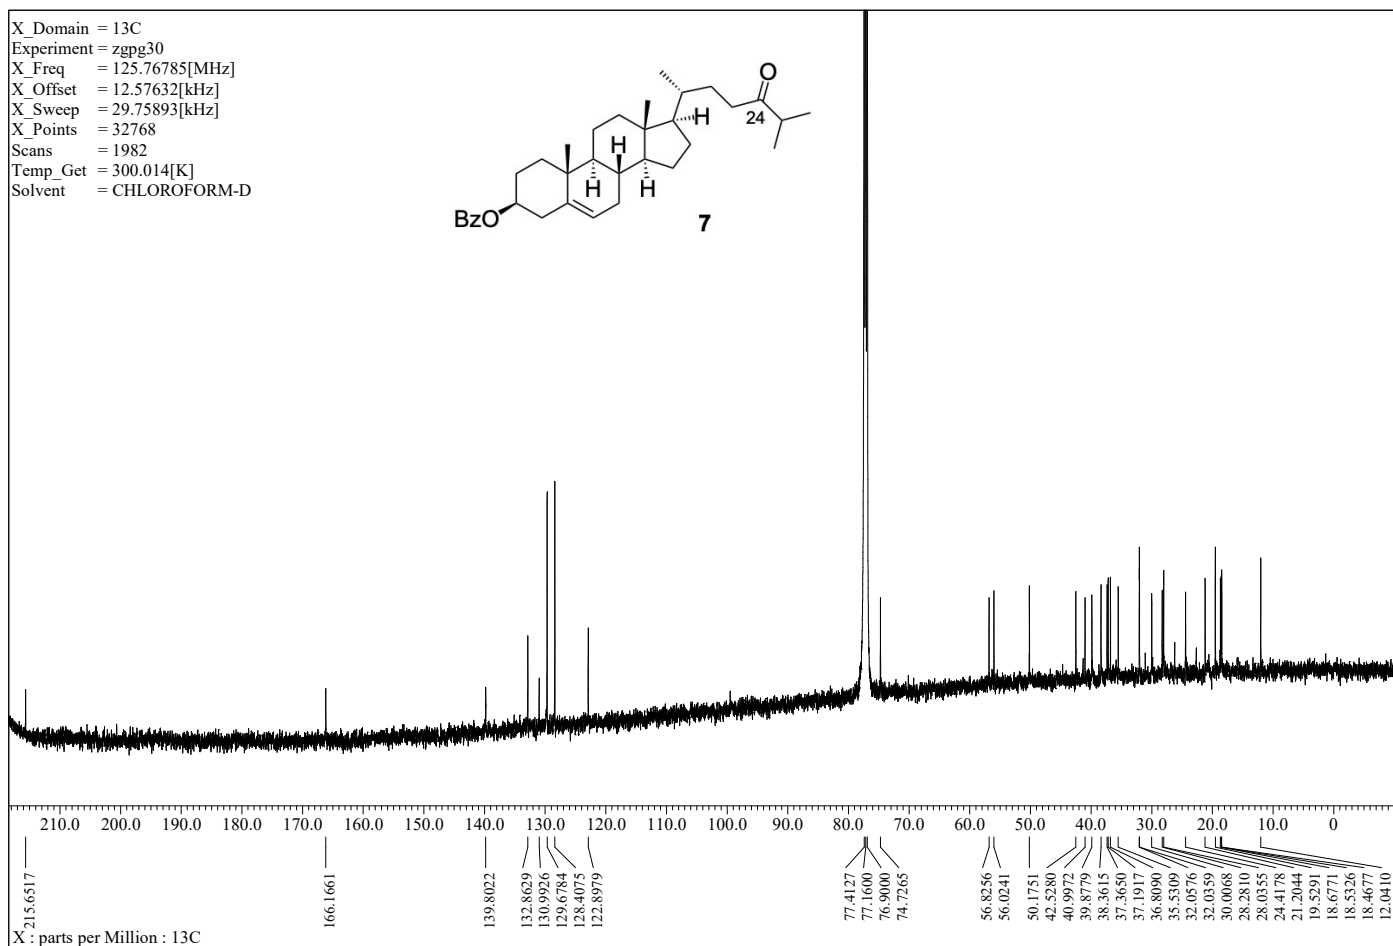

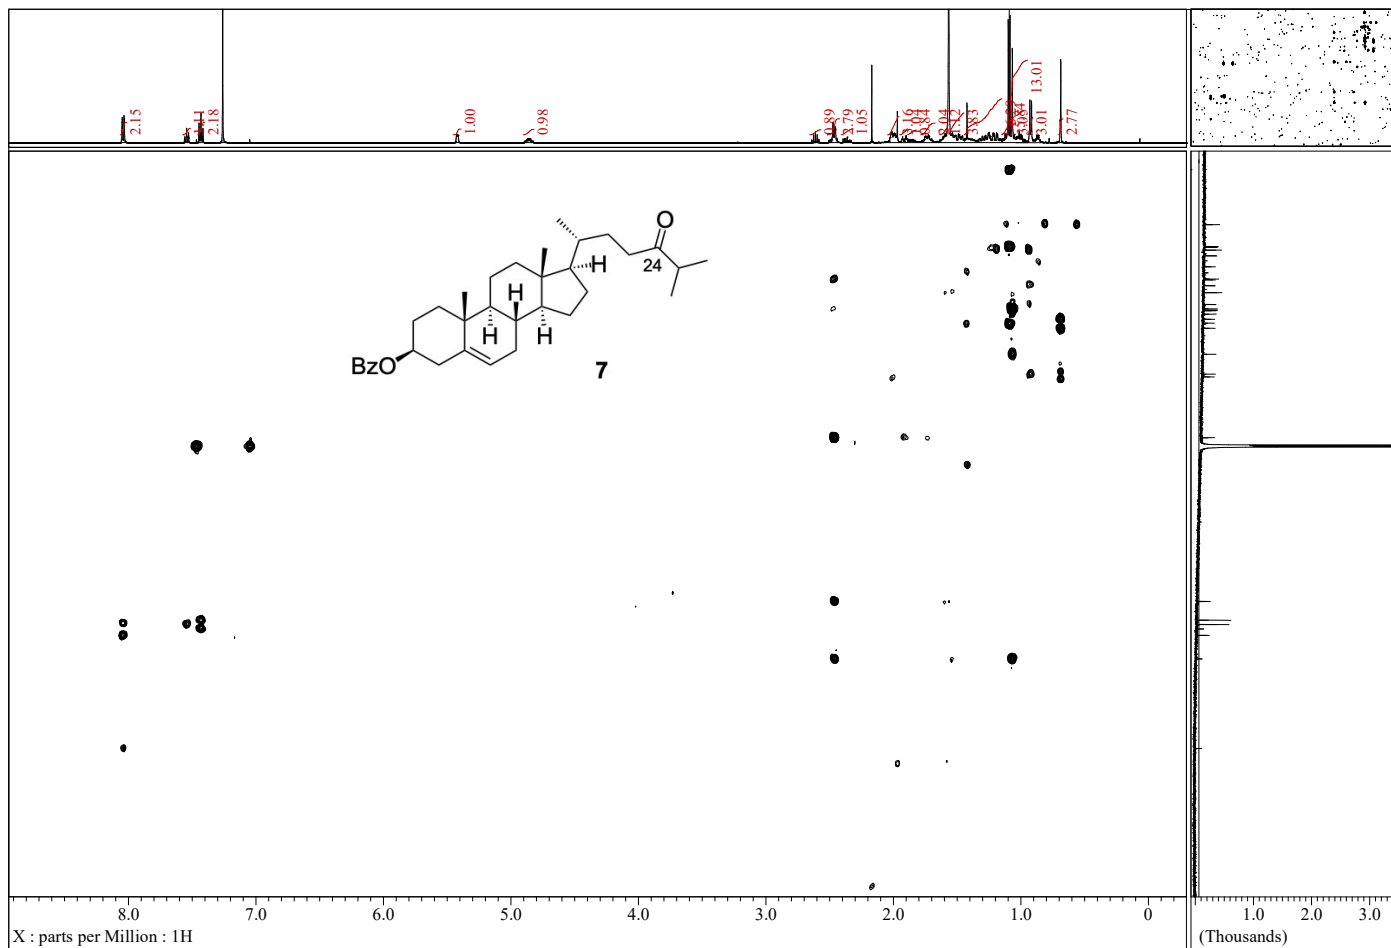

X\_Domain = 1H  
 Experiment= zg30  
 X\_Freq = 500.17[MHz]  
 X\_Offset = 3.08855[kHz]  
 X\_Sweep = 9.99994[kHz]  
 X\_Points = 32768  
 Scans = 128  
 Temp\_Get = 300.0049[K]  
 Solvent = CHLOROFORM-D

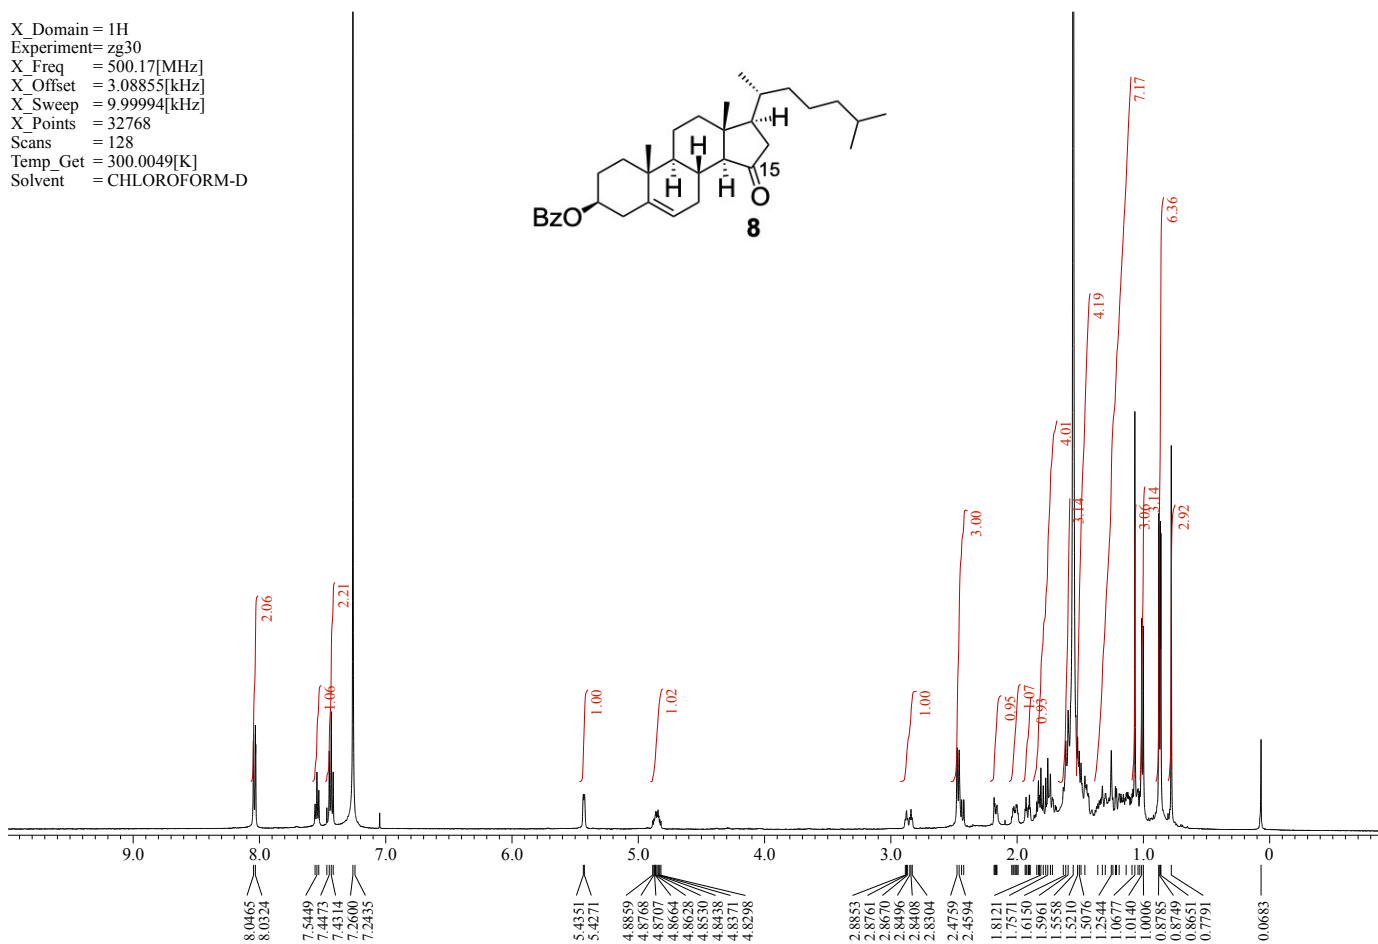

X\_Domain = 13C  
 Experiment= zgpg30  
 X\_Freq = 125.76785[MHz]  
 X\_Offset = 12.57632[kHz]  
 X\_Sweep = 29.75893[kHz]  
 X\_Points = 32768  
 Scans = 2100  
 Temp\_Get = 299.9873[K]  
 Solvent = CHLOROFORM-D

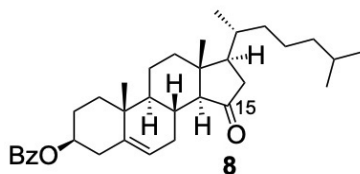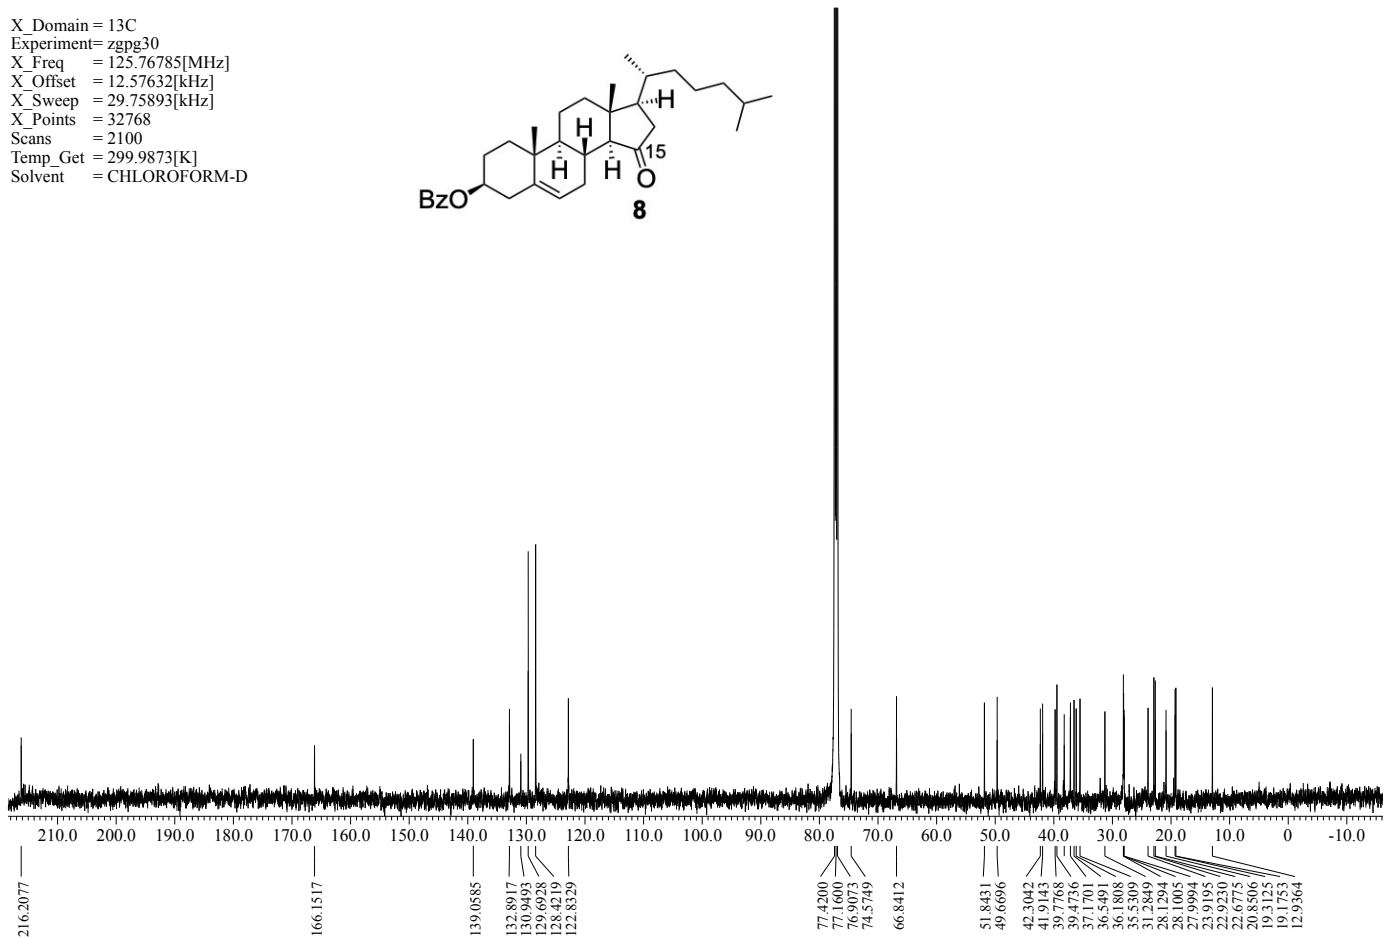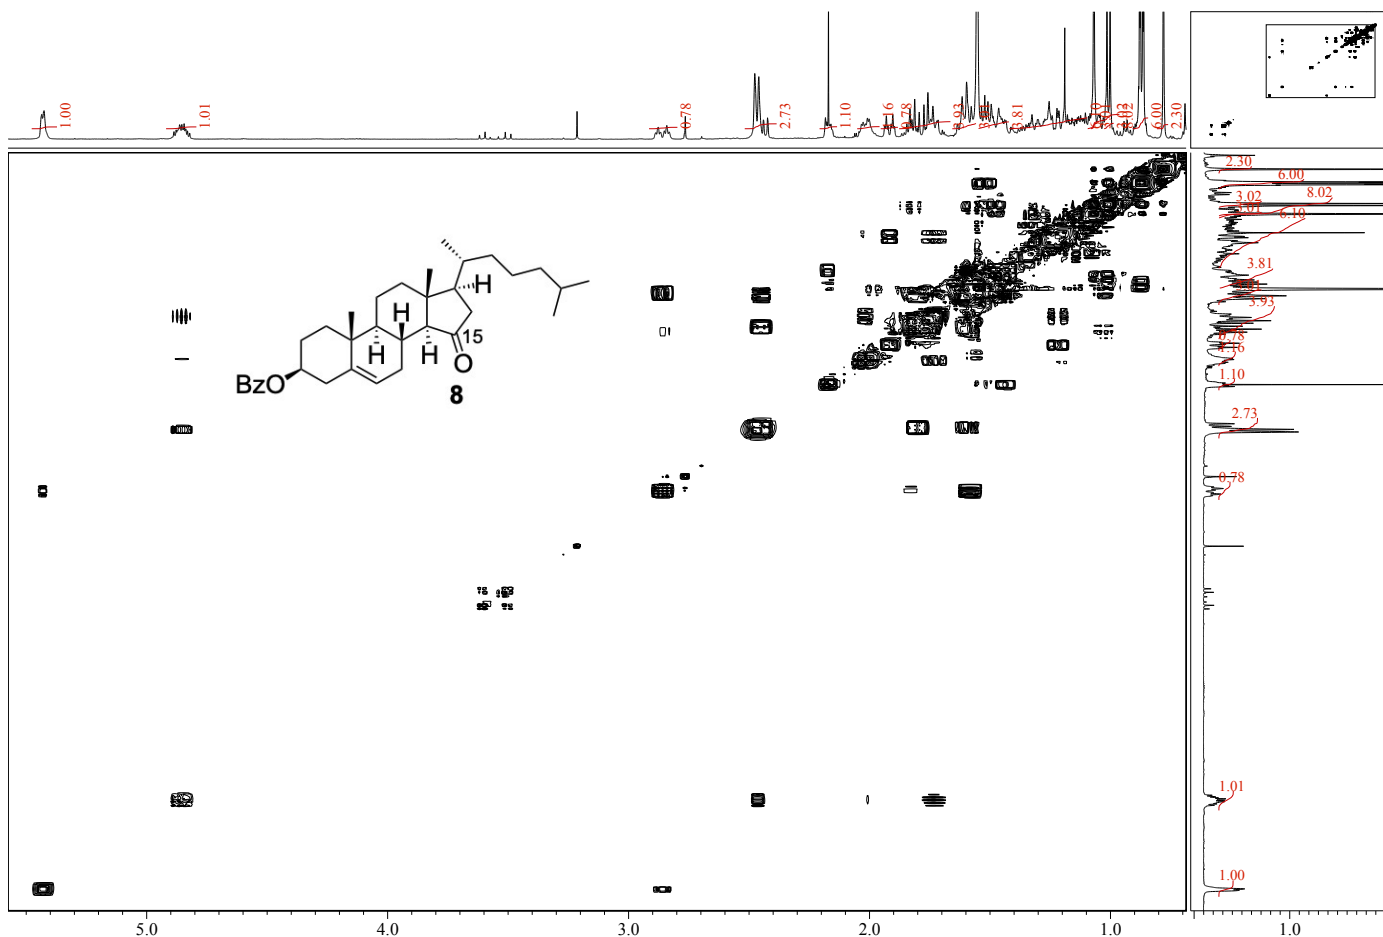

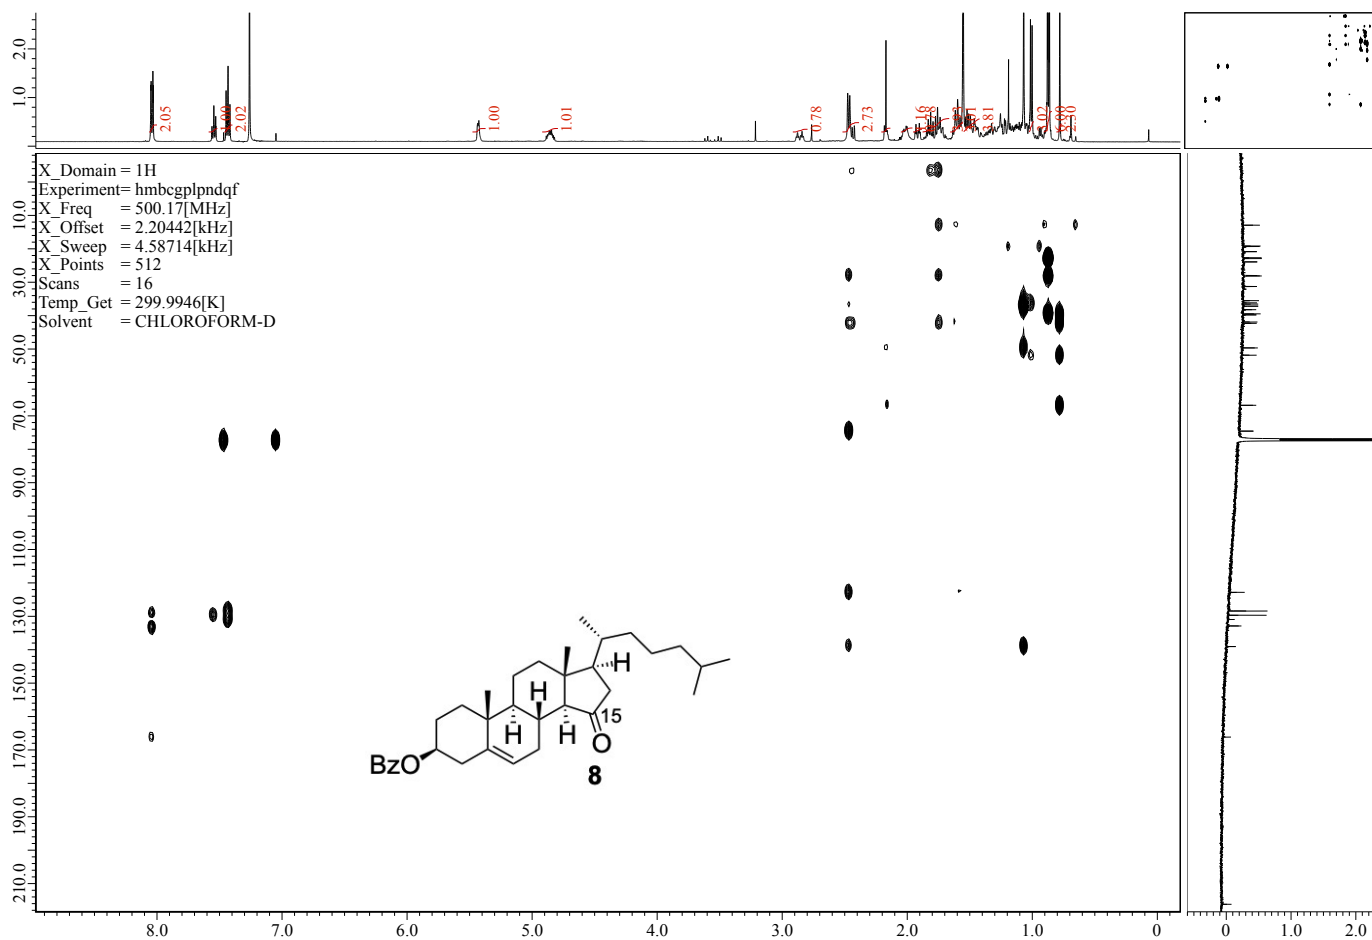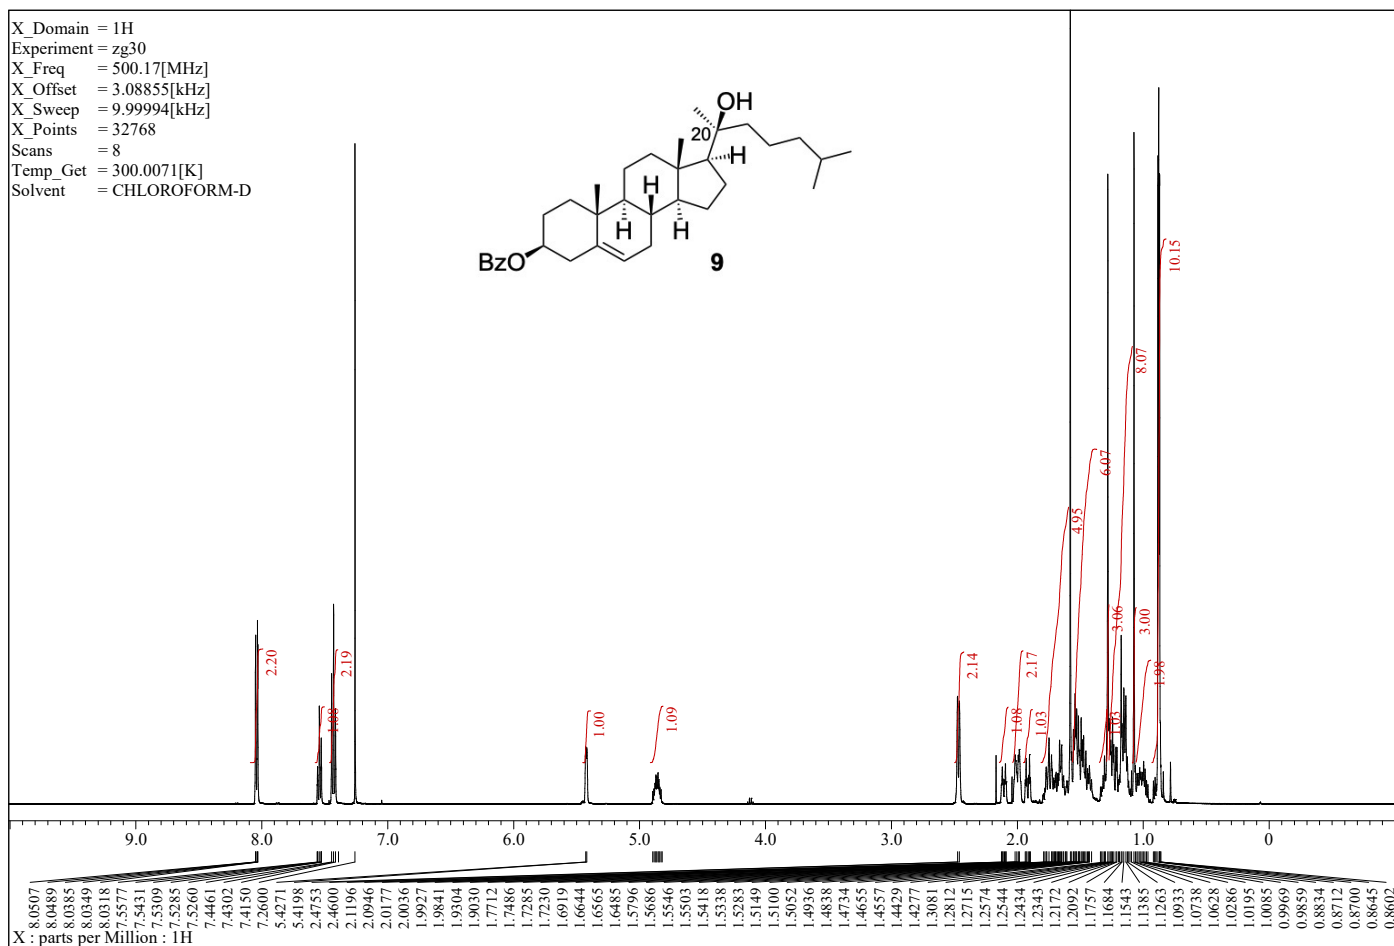

X\_Domain = 13C  
 Experiment = zgpg30  
 X\_Freq = 125.76785[MHz]  
 X\_Offset = 12.57632[kHz]  
 X\_Sweep = 29.75893[kHz]  
 X\_Points = 32768  
 Scans = 49  
 Temp\_Get = 300.0122[K]  
 Solvent = CHLOROFORM-D

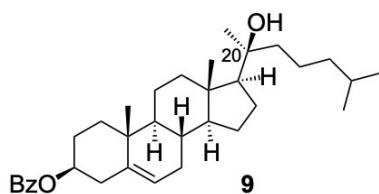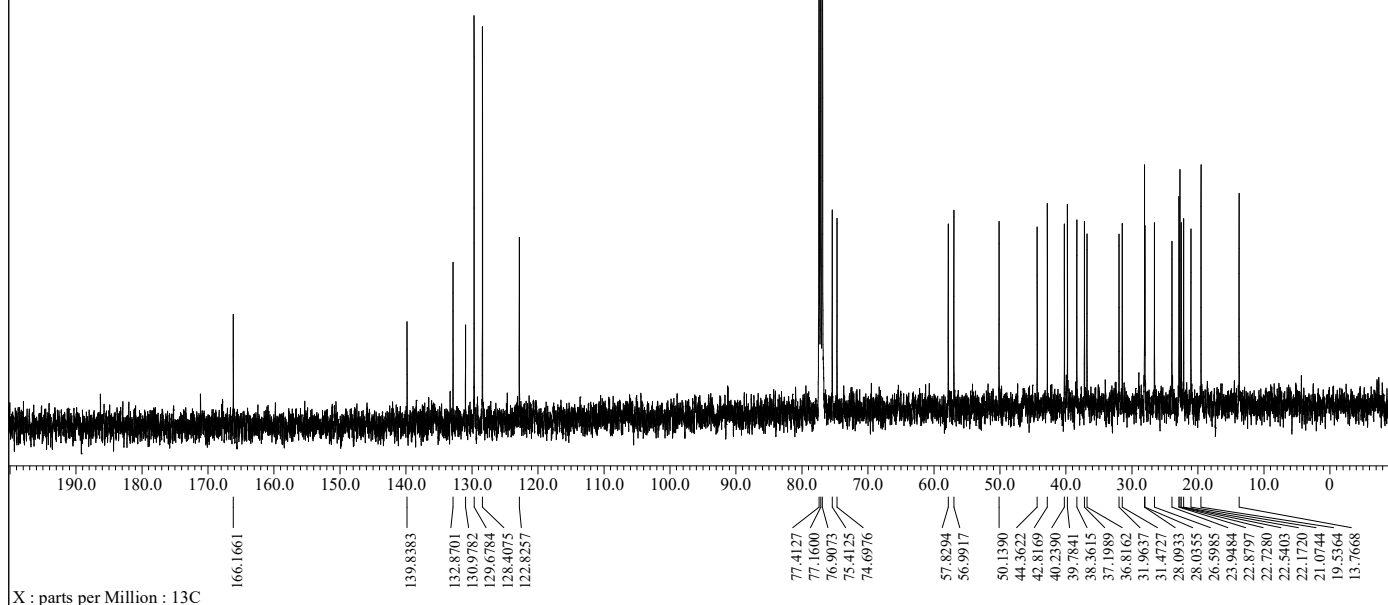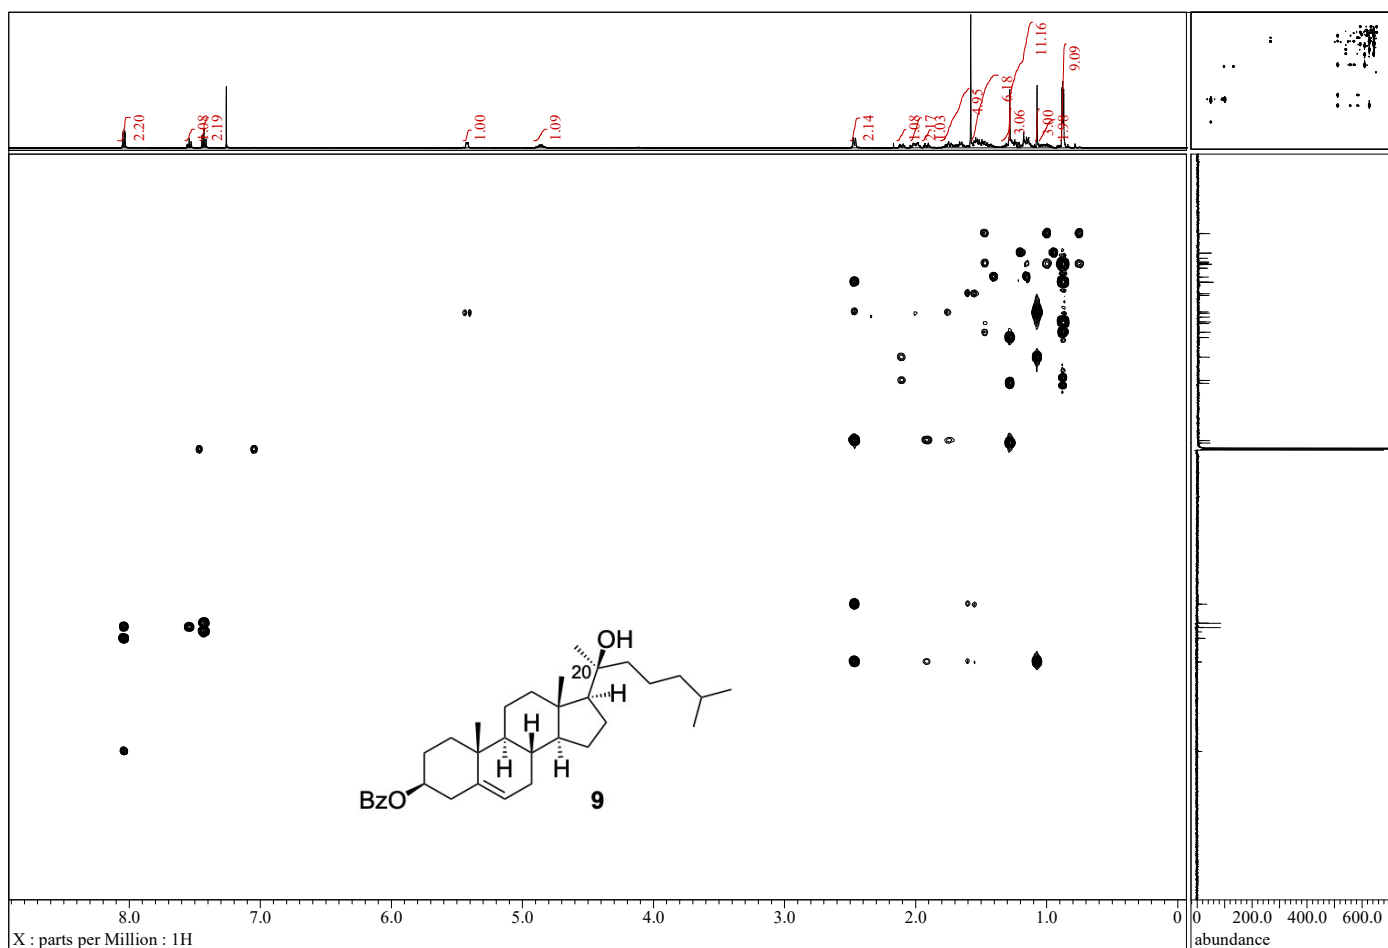

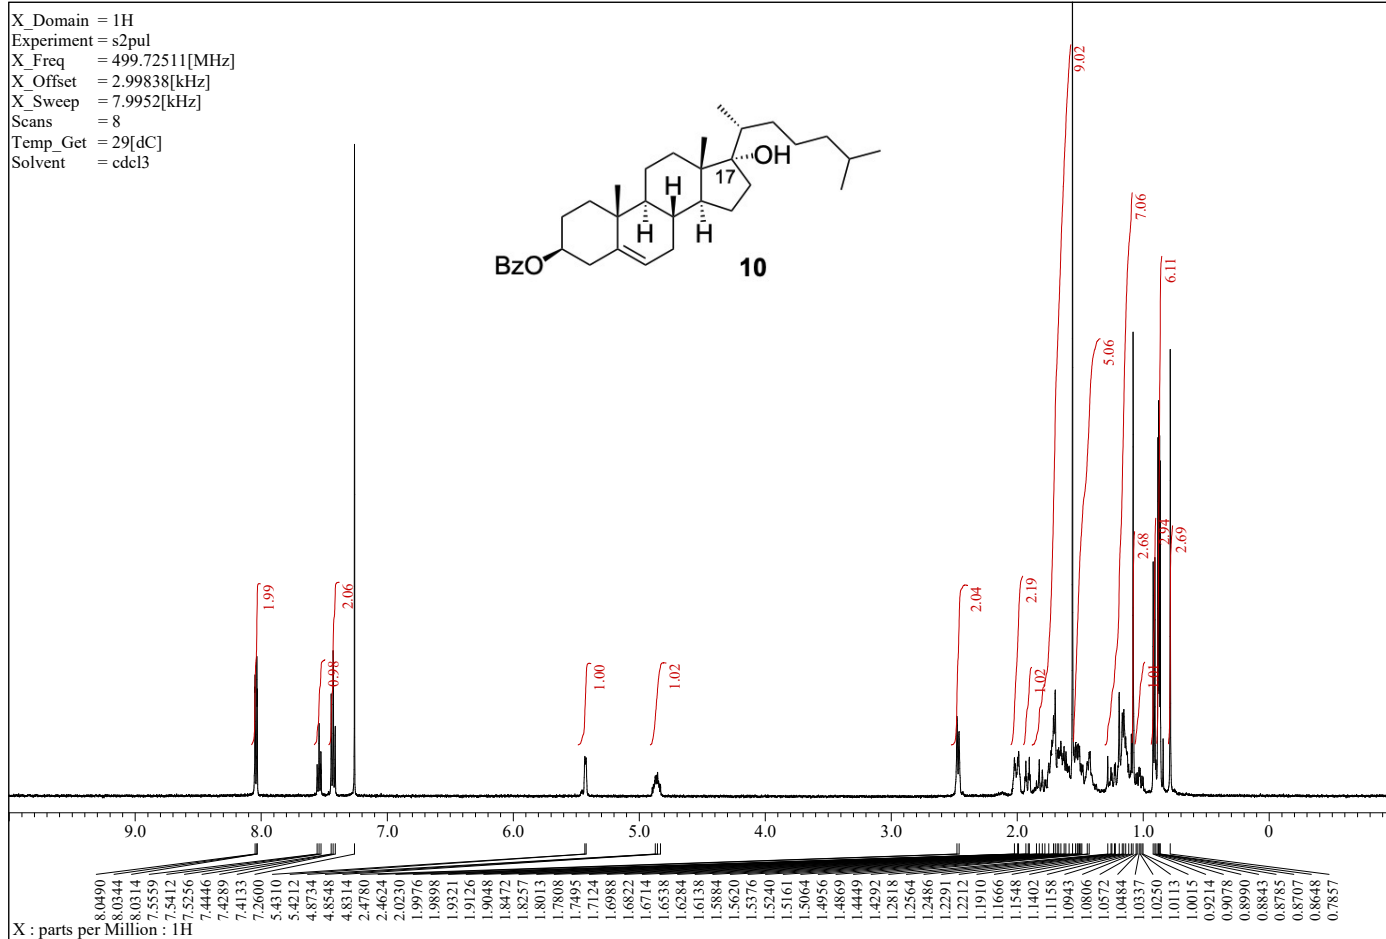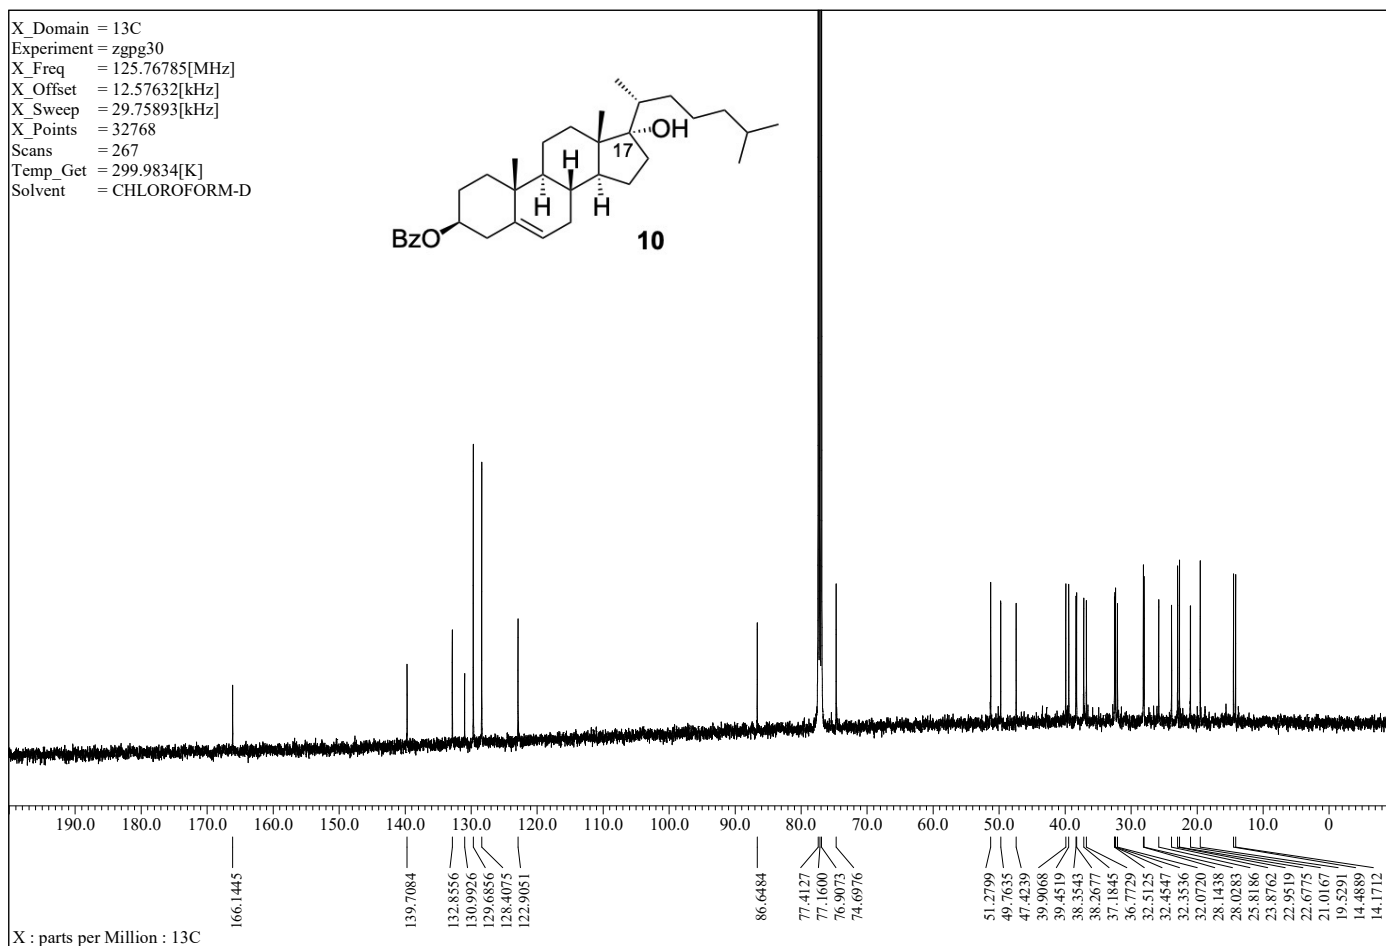

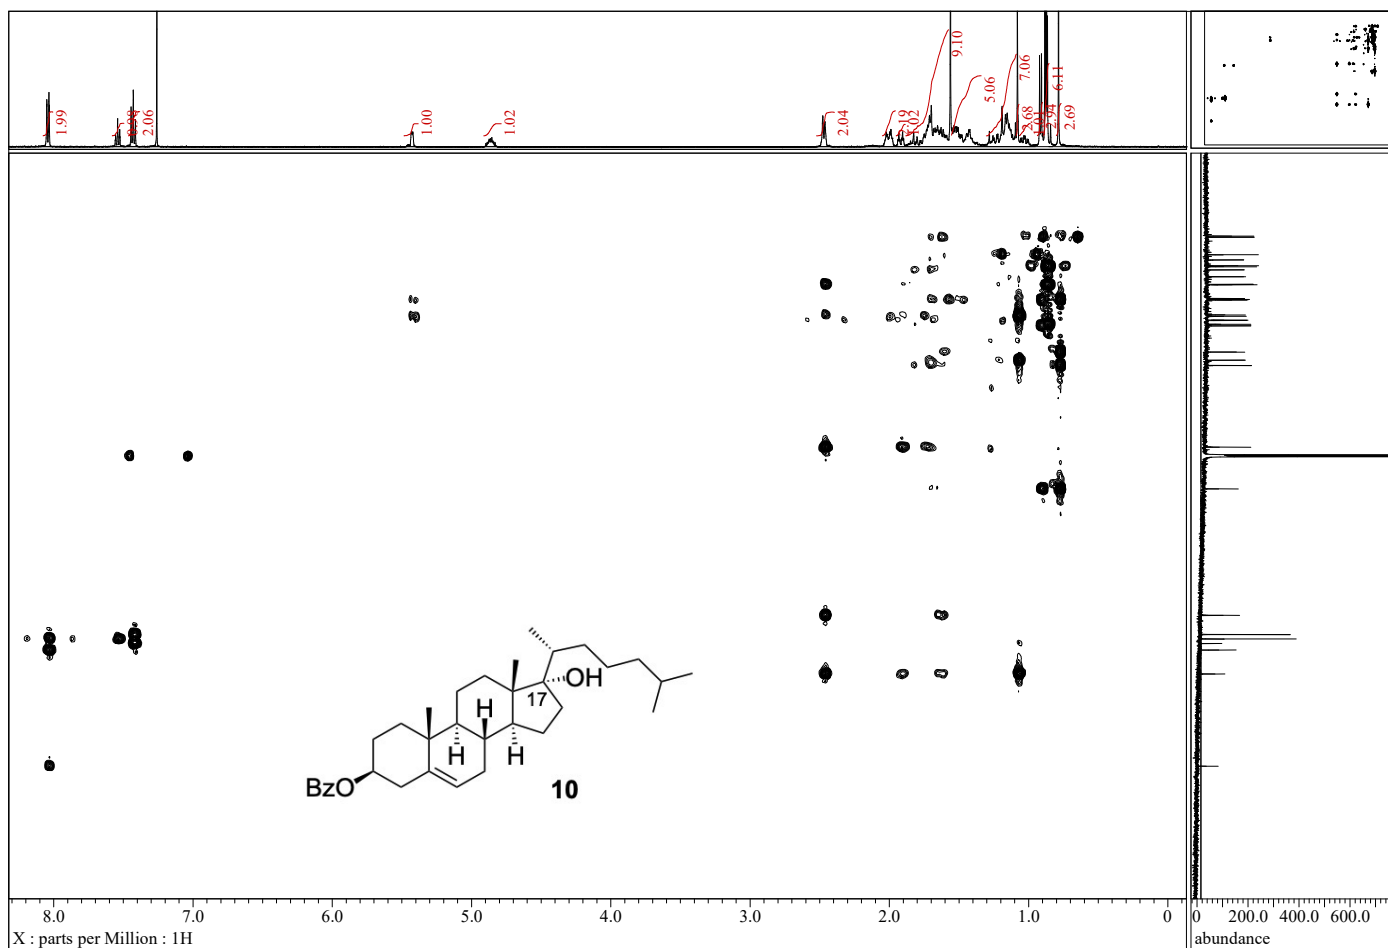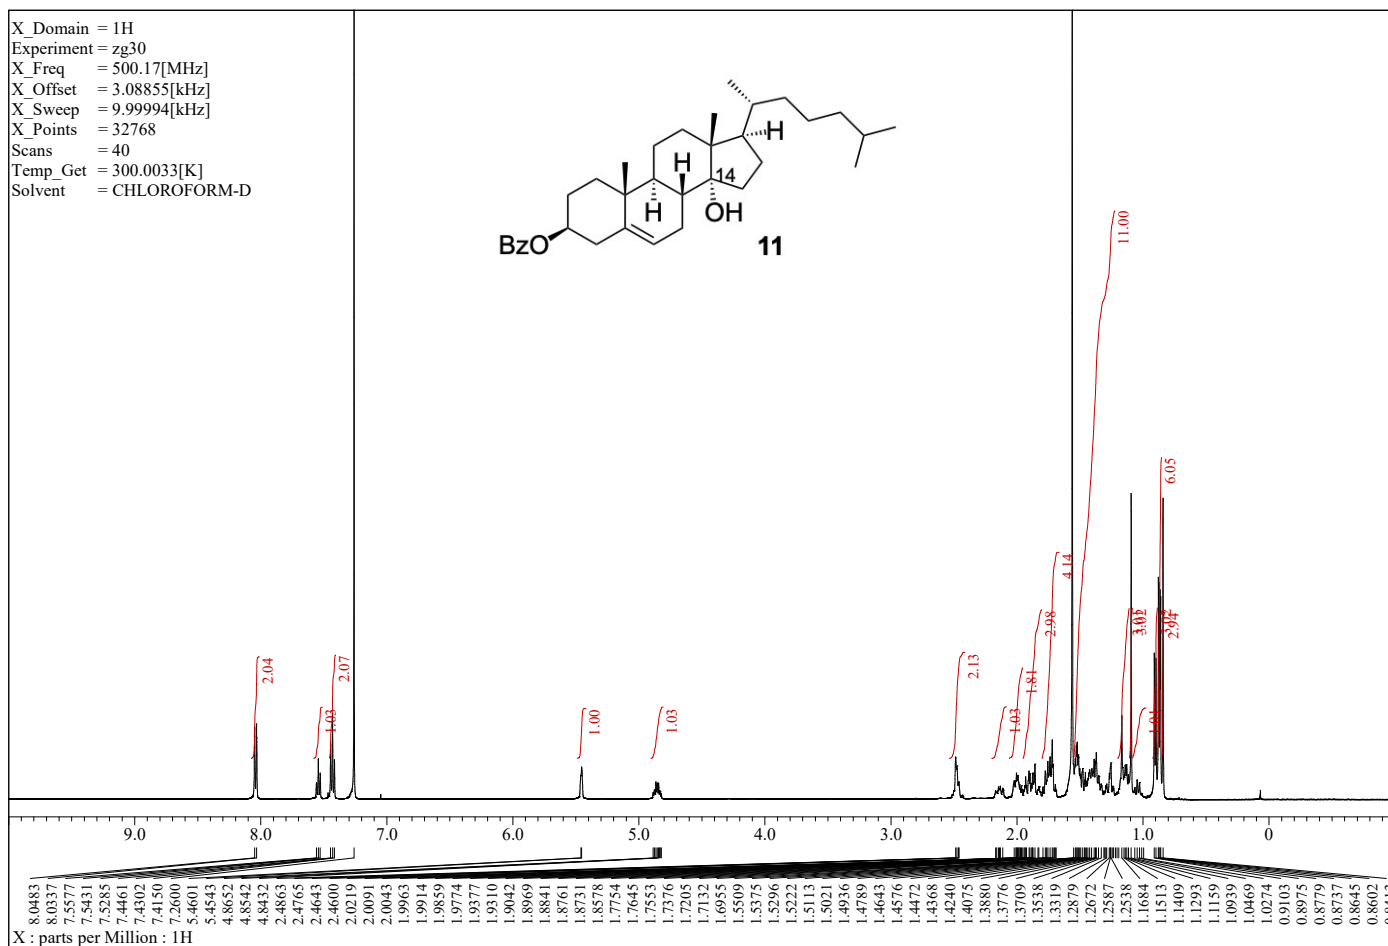

X\_Domain = 13C  
 Experiment = zgpg30  
 X\_Freq = 125.76785[MHz]  
 X\_Offset = 12.57632[kHz]  
 X\_Sweep = 29.75893[kHz]  
 X\_Points = 32768  
 Scans = 739  
 Temp\_Get = 300.0063[K]  
 Solvent = CHLOROFORM-D

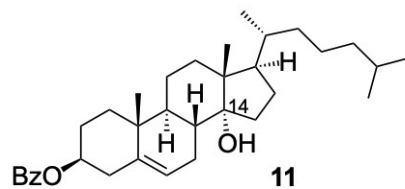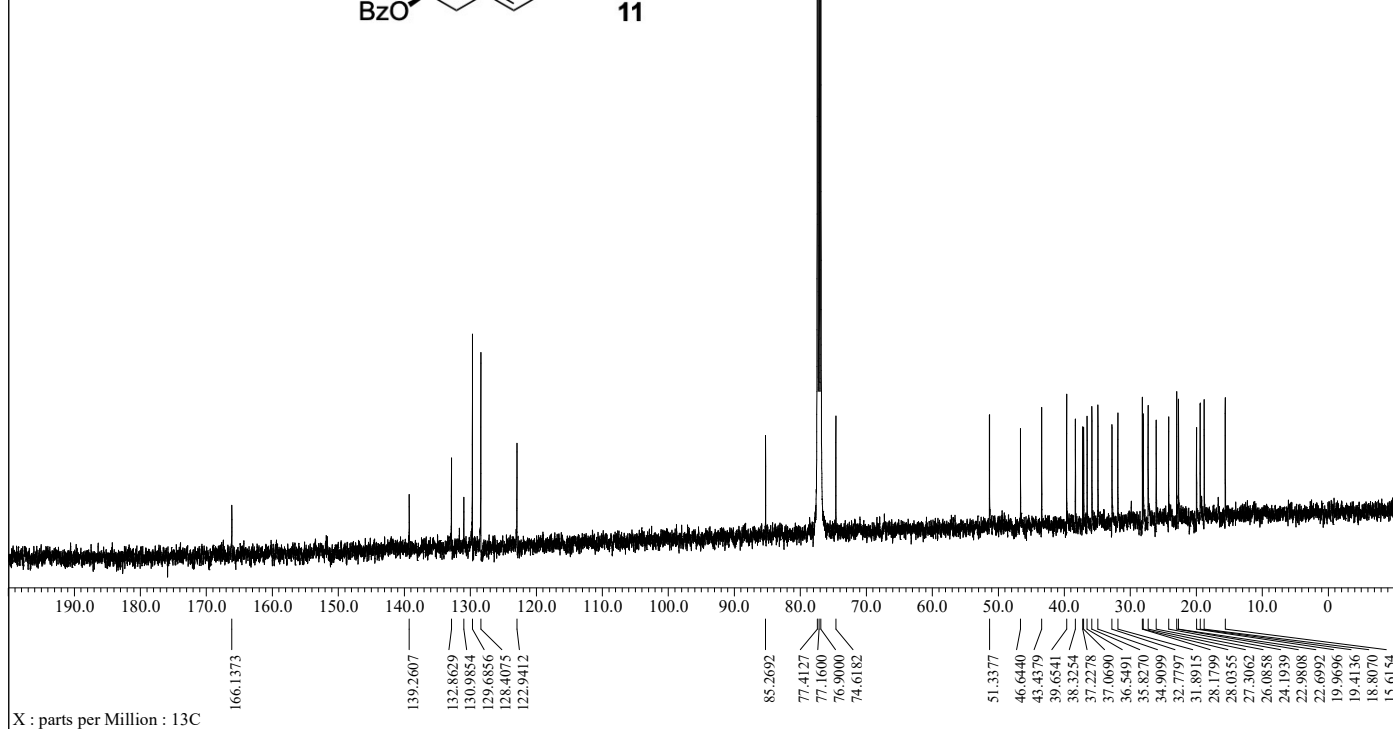

X\_Domain = 1H  
 Experiment = zg30  
 X\_Freq = 500.17[MHz]  
 X\_Offset = 3.08855[kHz]  
 X\_Sweep = 9.99994[kHz]  
 X\_Points = 32768  
 Scans = 16  
 Temp\_Get = 299.9866[K]  
 Solvent = CHLOROFORM-D

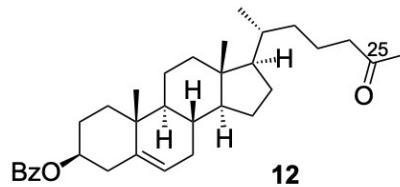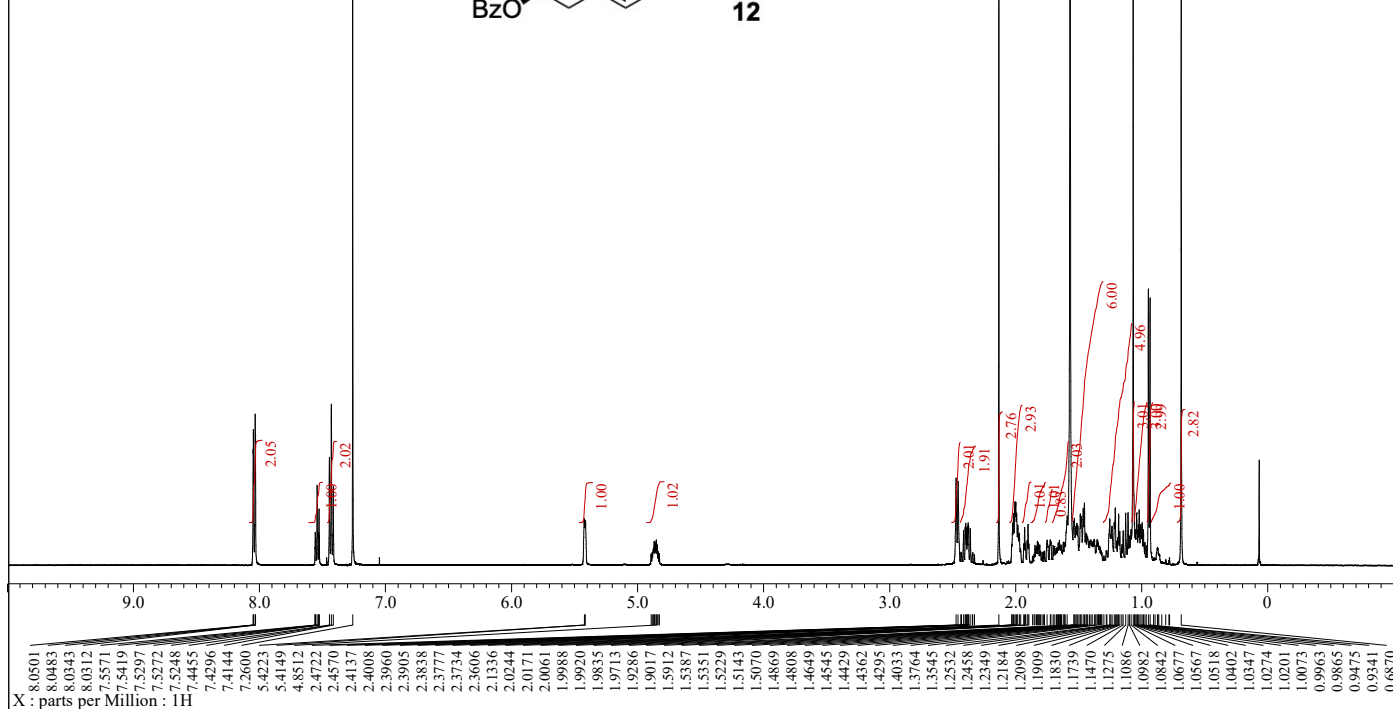



X\_Domain = 13C  
 Experiment = zgpg30  
 X\_Freq = 125.76785[MHz]  
 X\_Offset = 12.57632[kHz]  
 X\_Sweep = 29.75893[kHz]  
 X\_Points = 32768  
 Scans = 220  
 Temp\_Get = 299.9889[K]  
 Solvent = CHLOROFORM-D

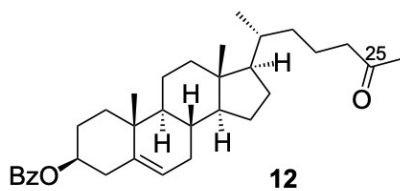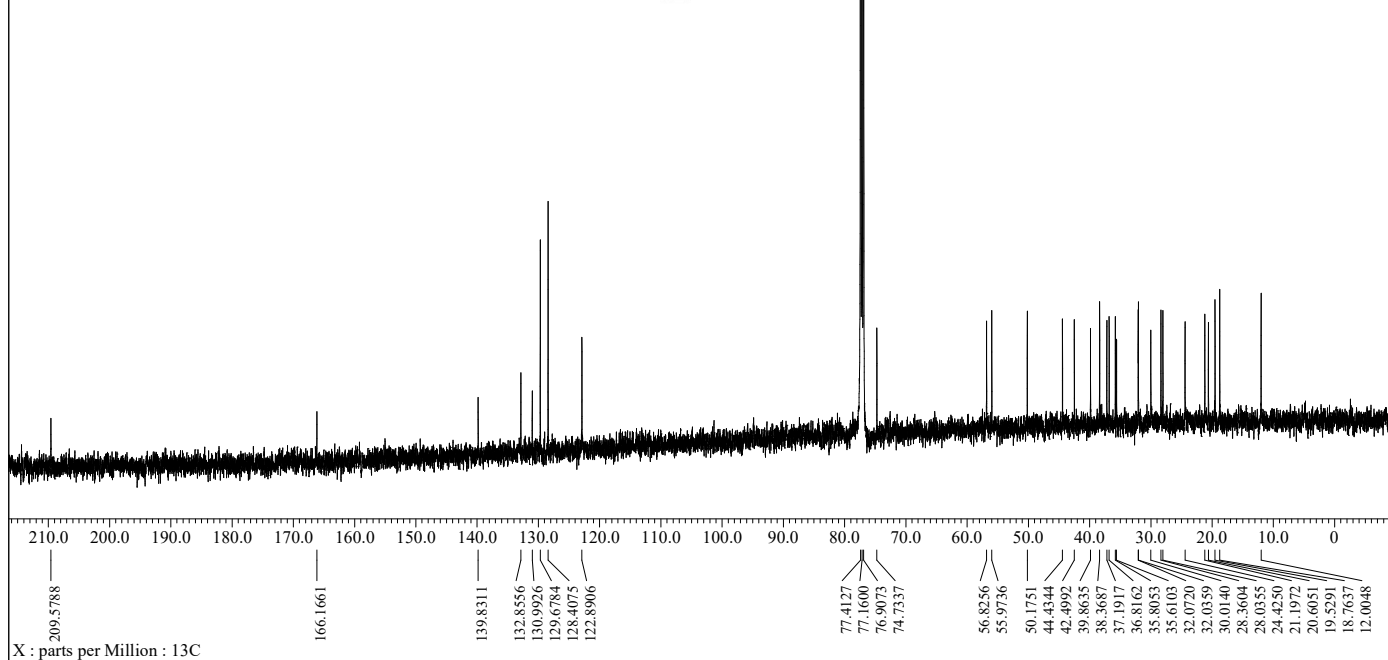

X\_Domain = 1H  
 Experiment = zg30  
 X\_Freq = 500.17[MHz]  
 X\_Offset = 3.08855[kHz]  
 X\_Sweep = 9.99994[kHz]  
 X\_Points = 32768  
 Scans = 64  
 Temp\_Get = 300.0143[K]  
 Solvent = CHLOROFORM-D

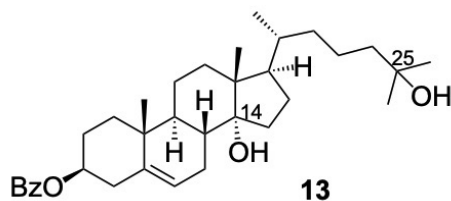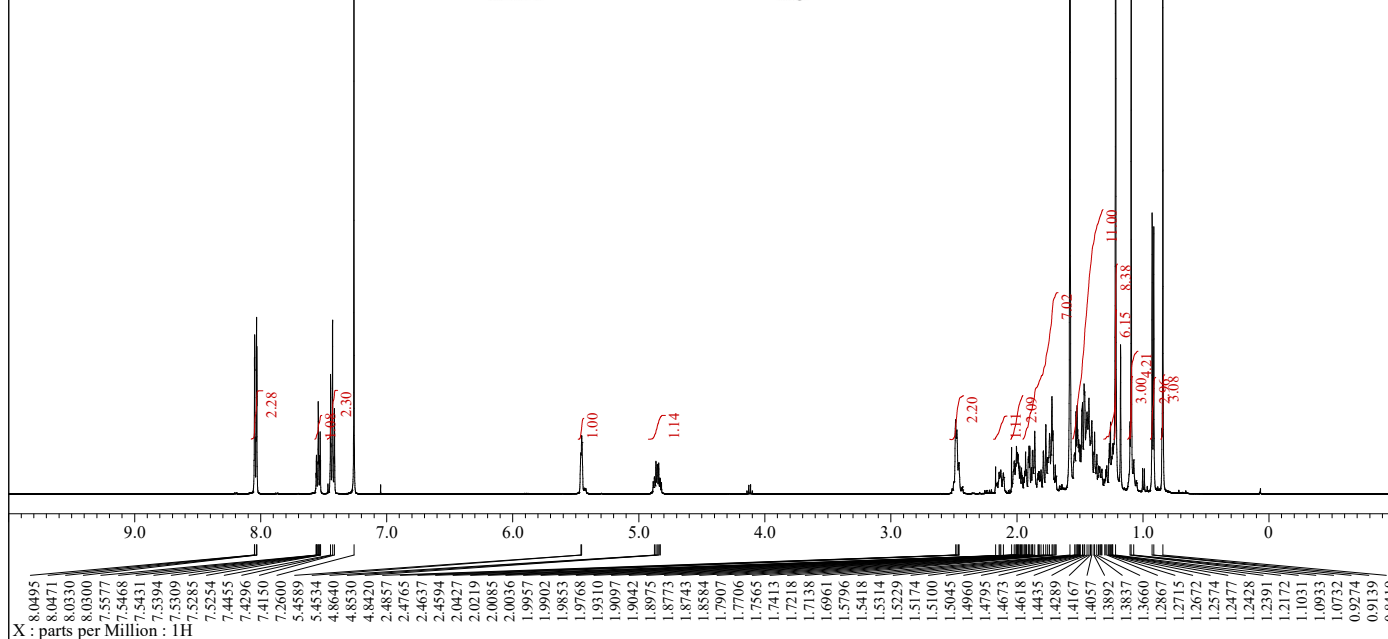

X\_Domain = 13C  
 Experiment = zgpg30  
 X\_Freq = 125.76785[MHz]  
 X\_Offset = 12.57632[kHz]  
 X\_Sweep = 29.75893[kHz]  
 X\_Points = 32768  
 Scans = 2048  
 Temp\_Get = 300.0081[K]  
 Solvent = CHLOROFORM-D

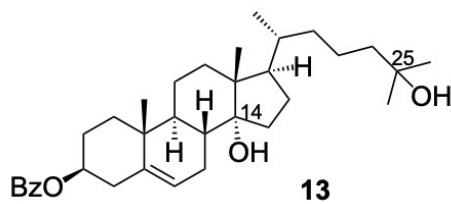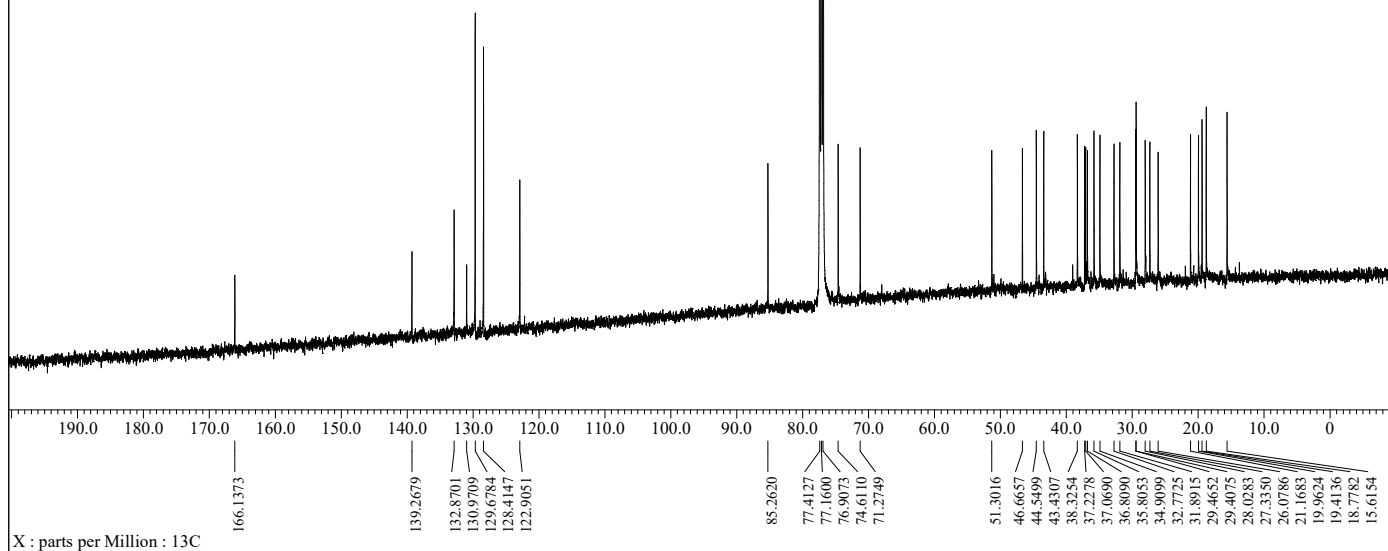

X\_Domain = 1H  
 Experiment = zg30  
 X\_Freq = 500.17[MHz]  
 X\_Offset = 3.08855[kHz]  
 X\_Sweep = 9.99994[kHz]  
 X\_Points = 32768  
 Scans = 64  
 Temp\_Get = 300.0144[K]  
 Solvent = CHLOROFORM-D

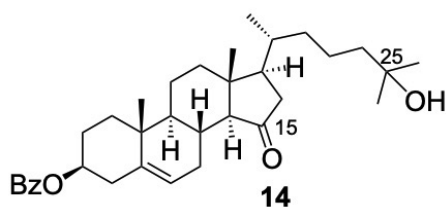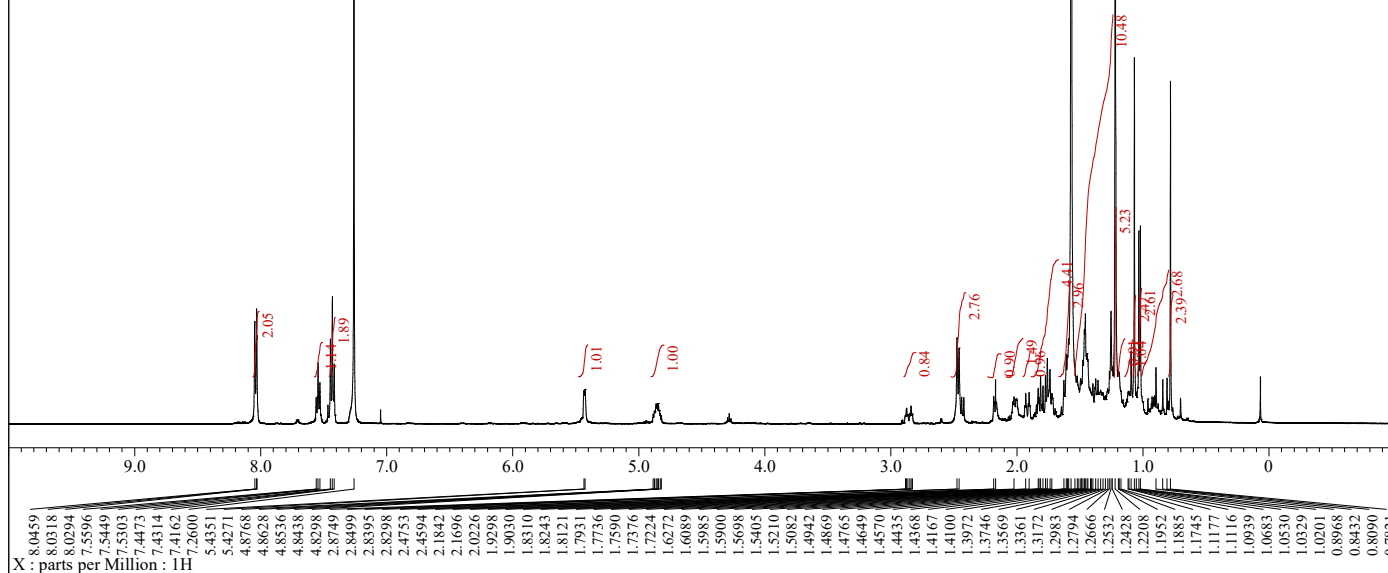

**14**

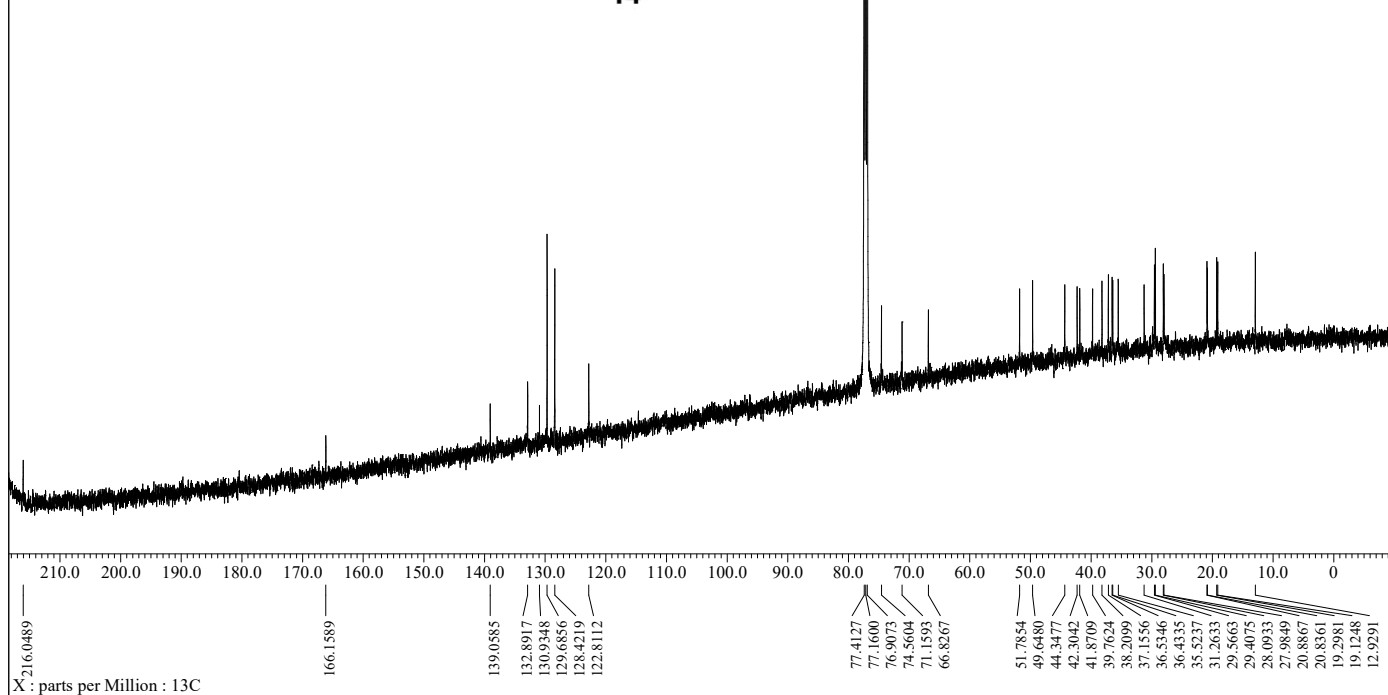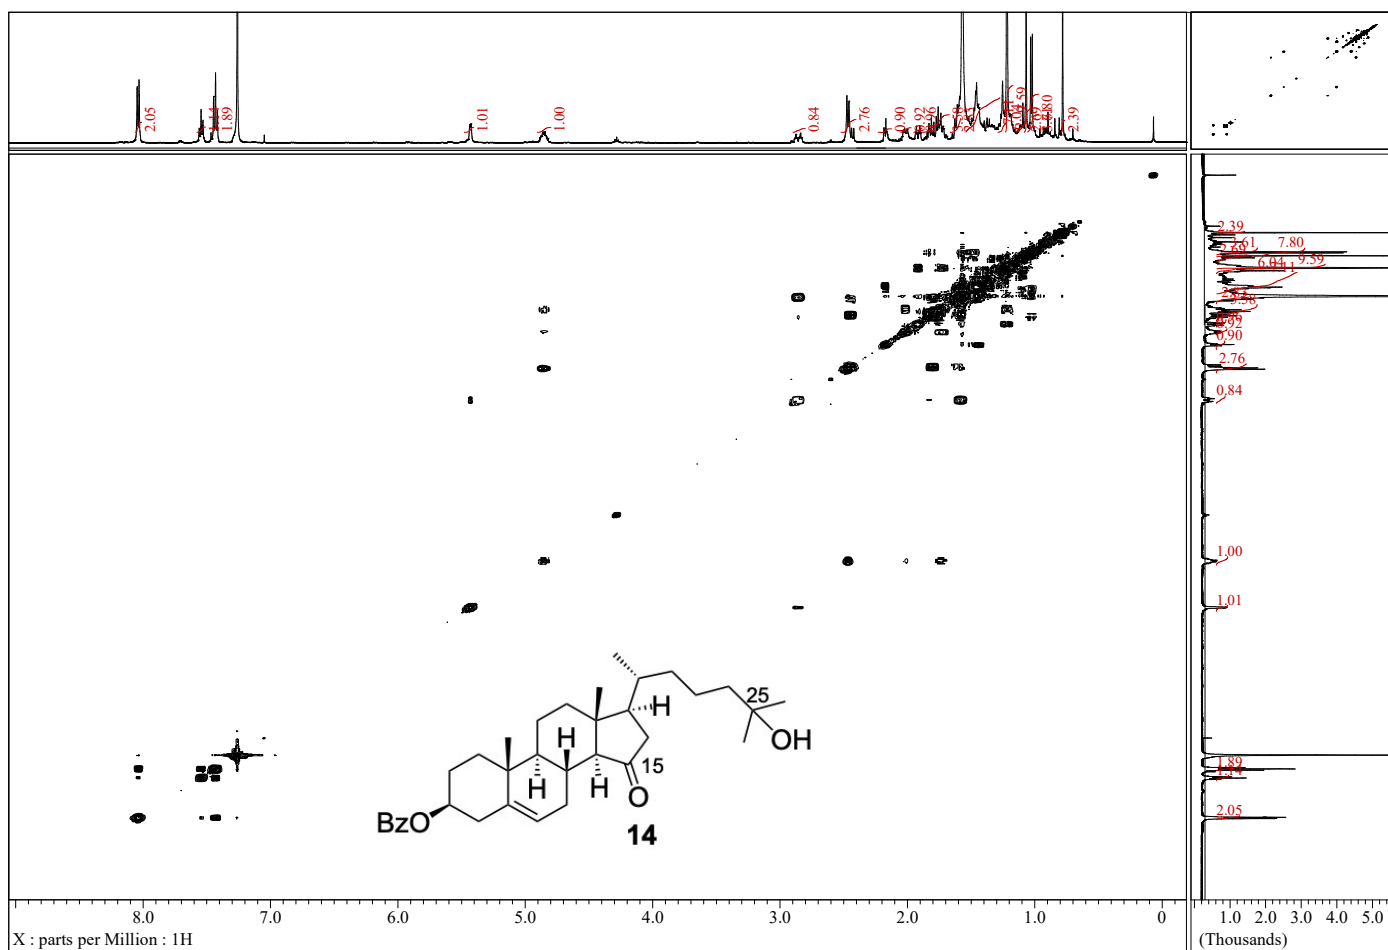

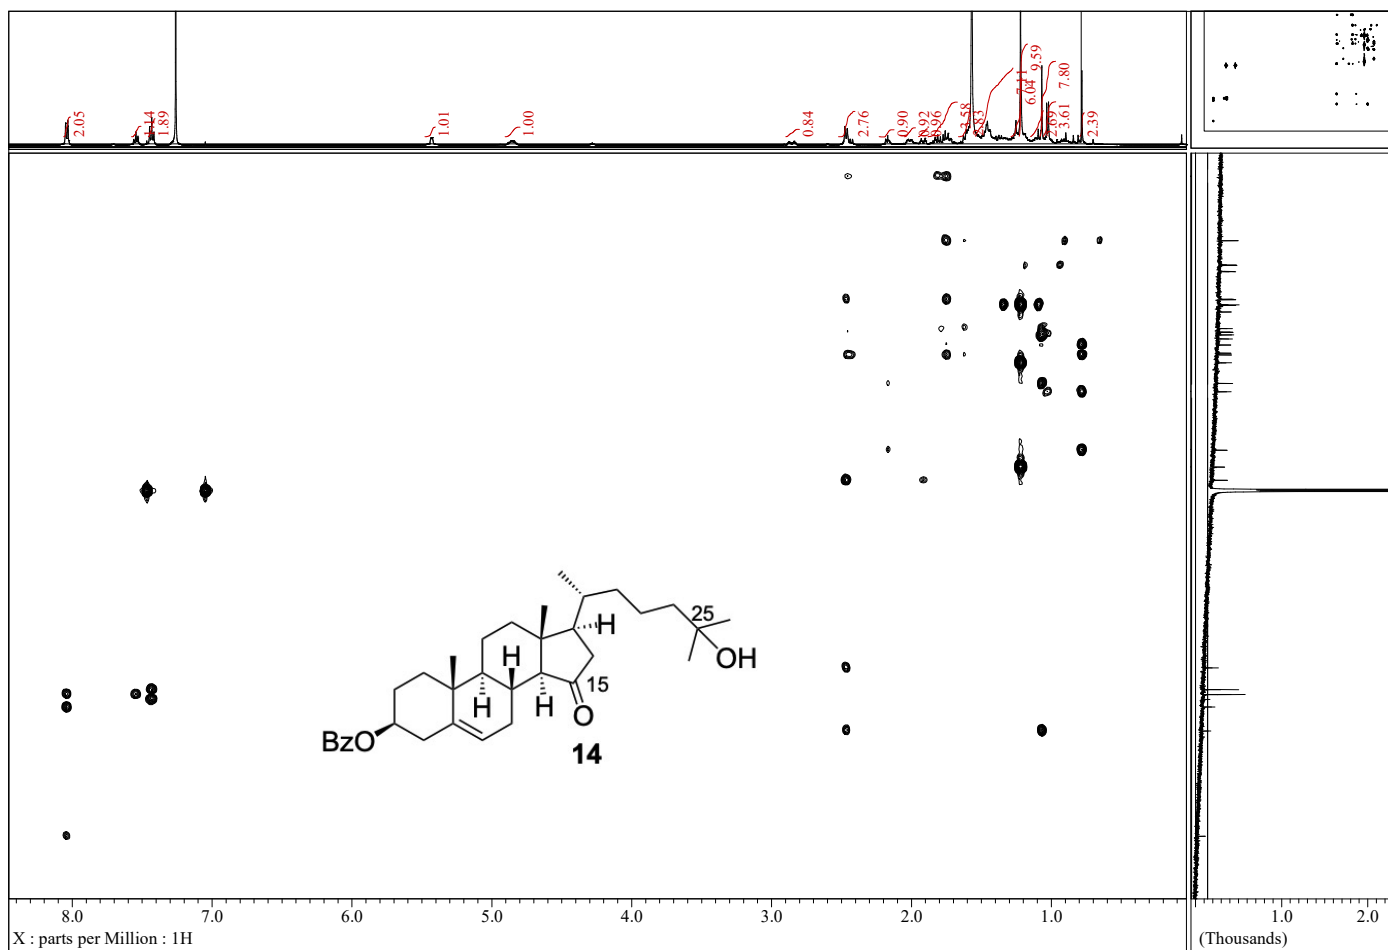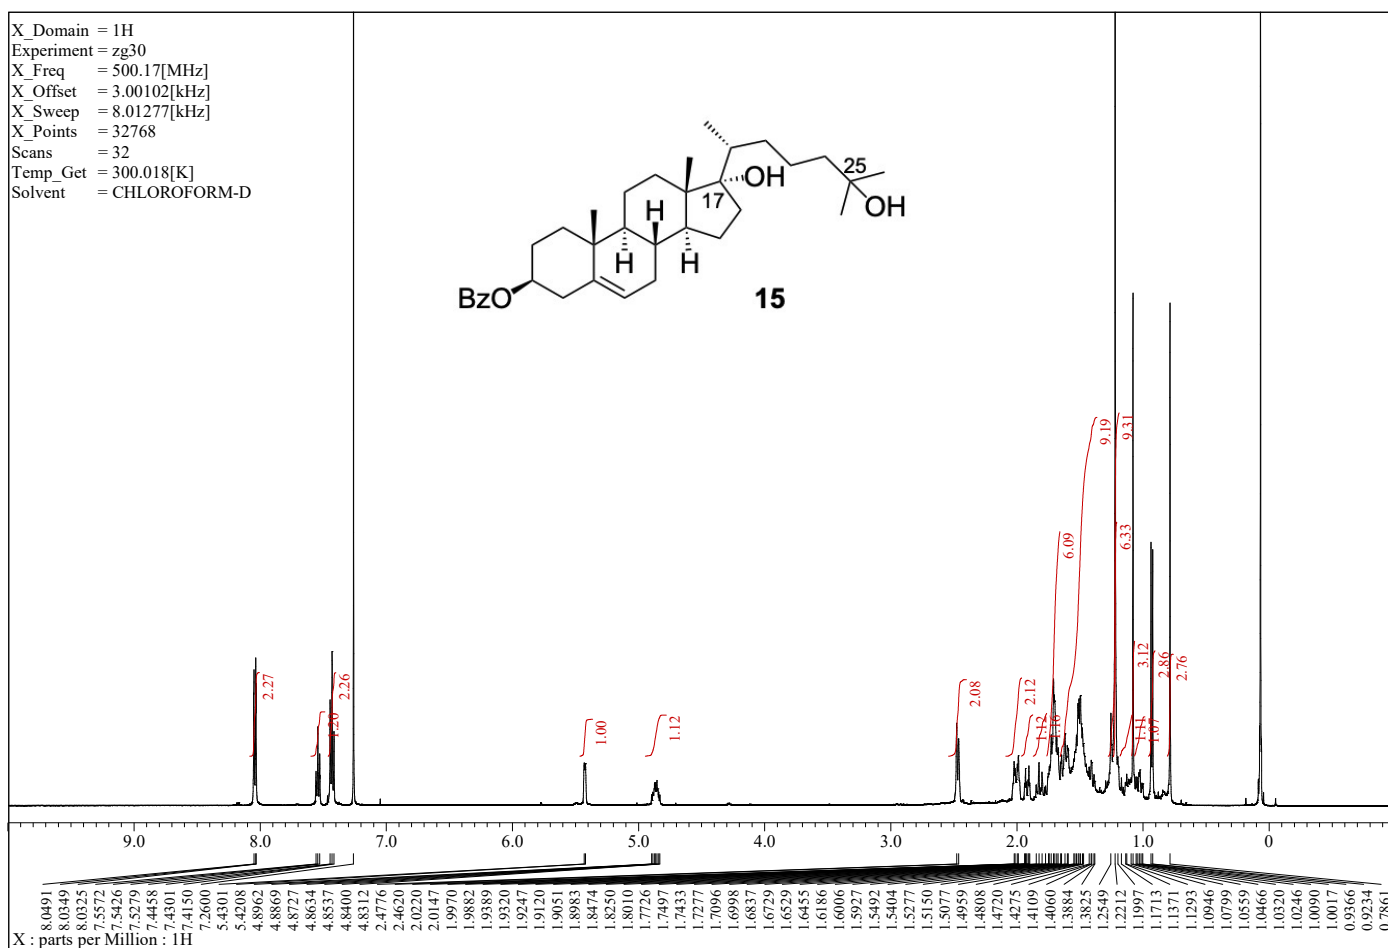

X\_Domain = 13C  
 Experiment = zgpg30  
 X\_Freq = 125.76785[MHz]  
 X\_Offset = 12.57632[kHz]  
 X\_Sweep = 29.75893[kHz]  
 X\_Points = 32768  
 Scans = 620  
 Temp\_Get = 299.9767[K]  
 Solvent = CHLOROFORM-D

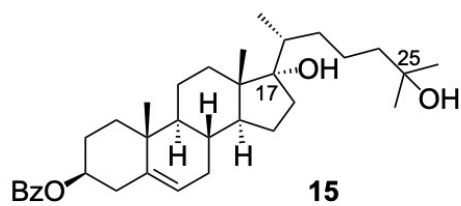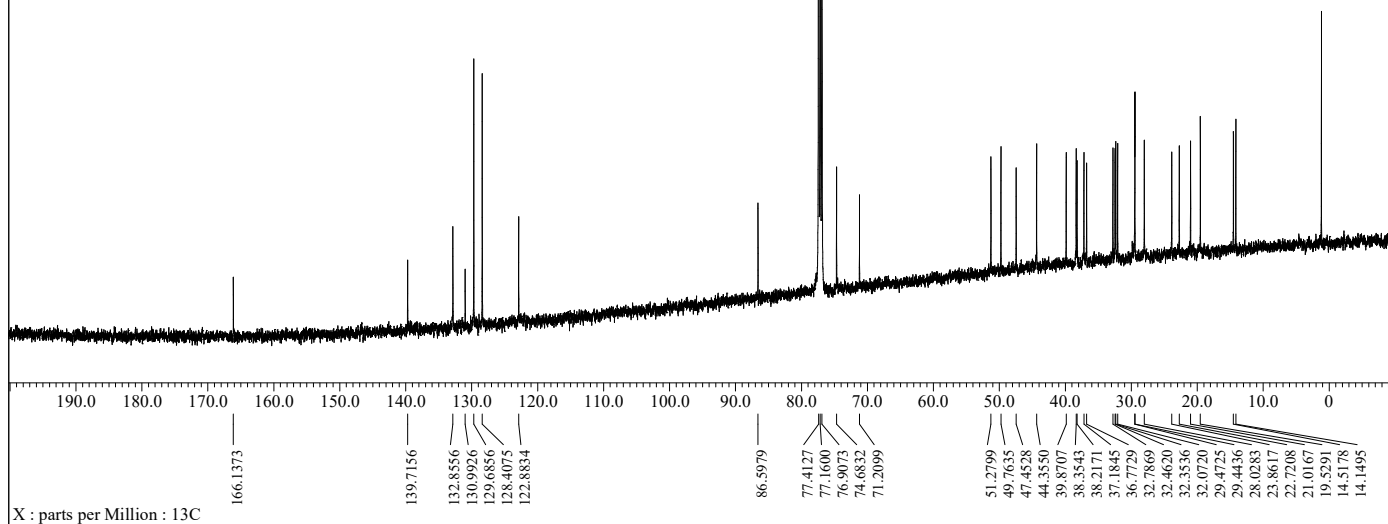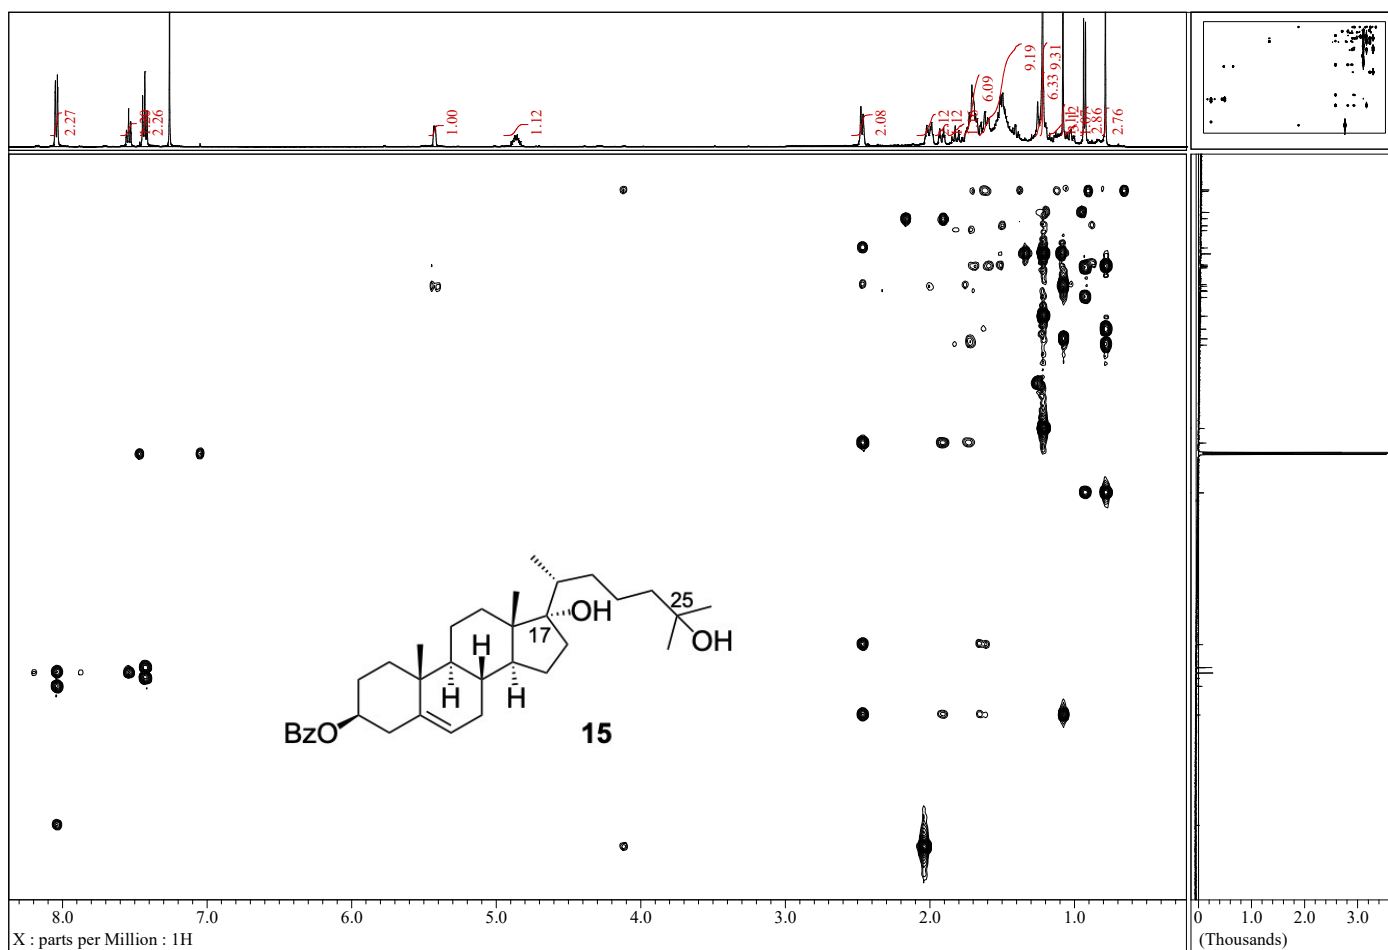

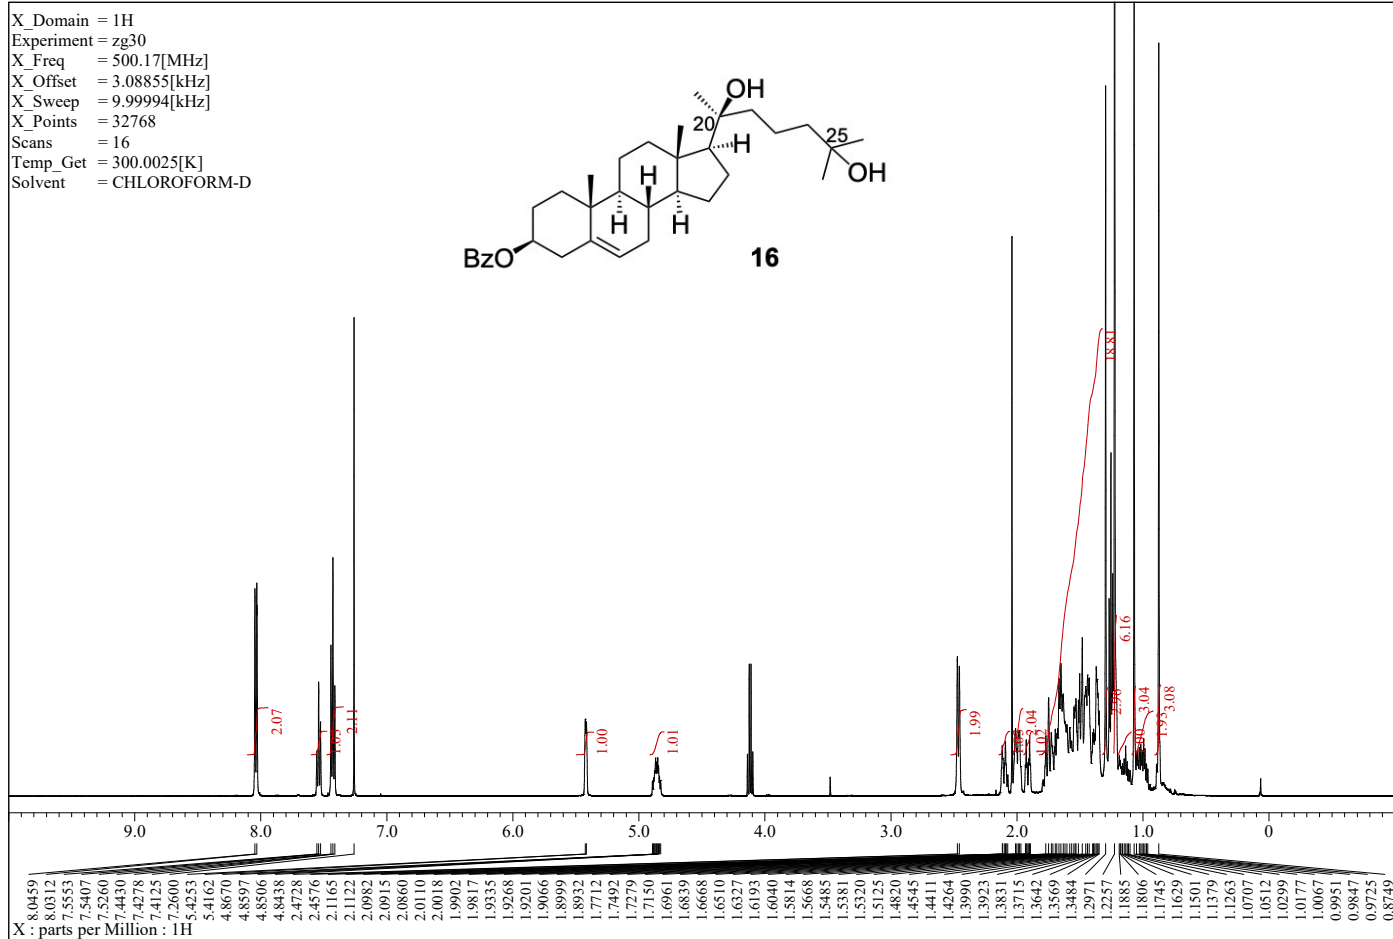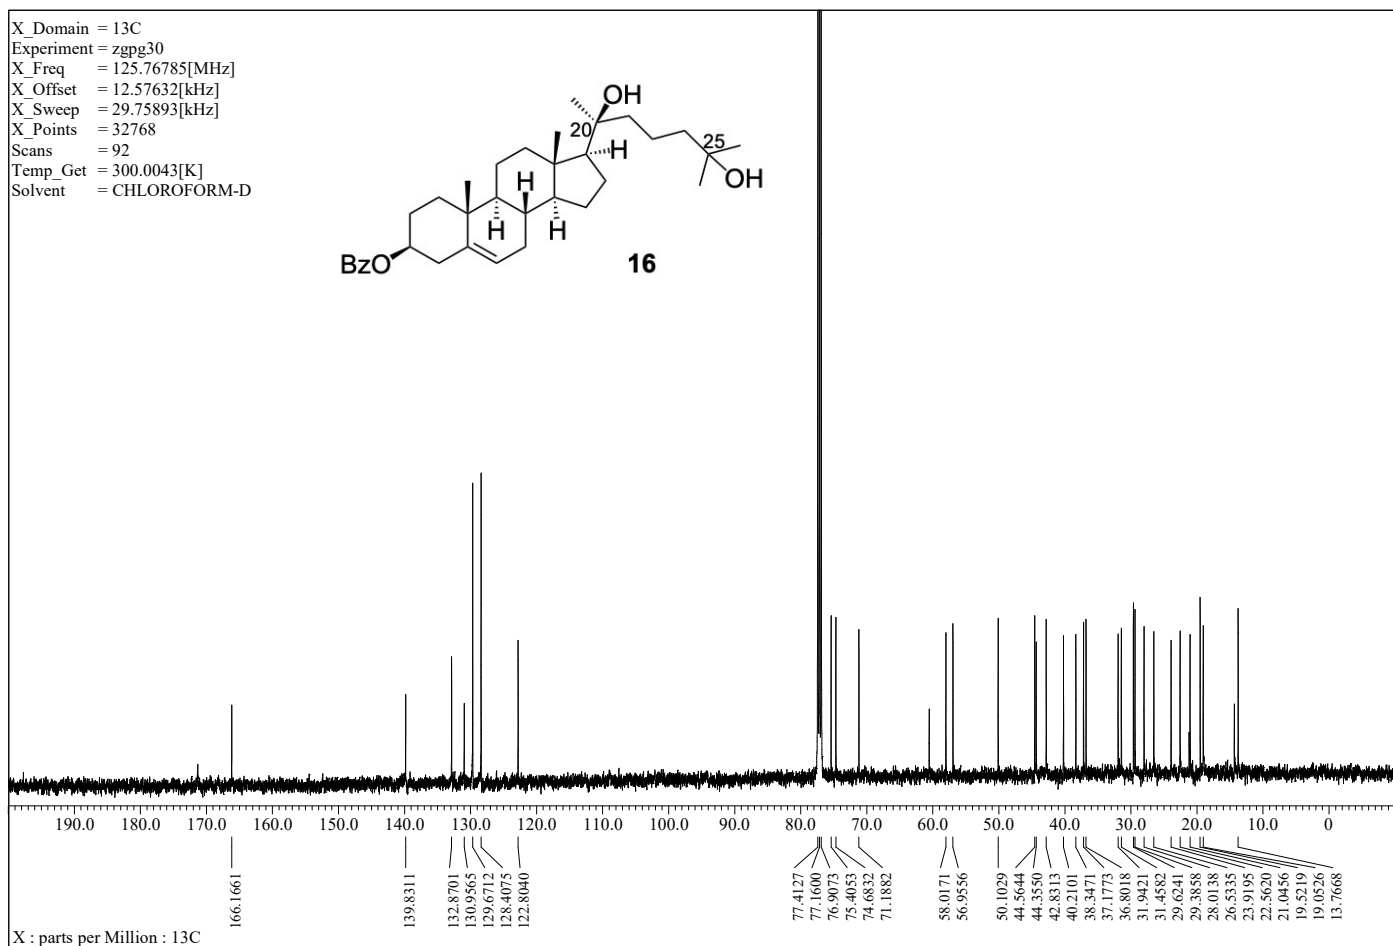

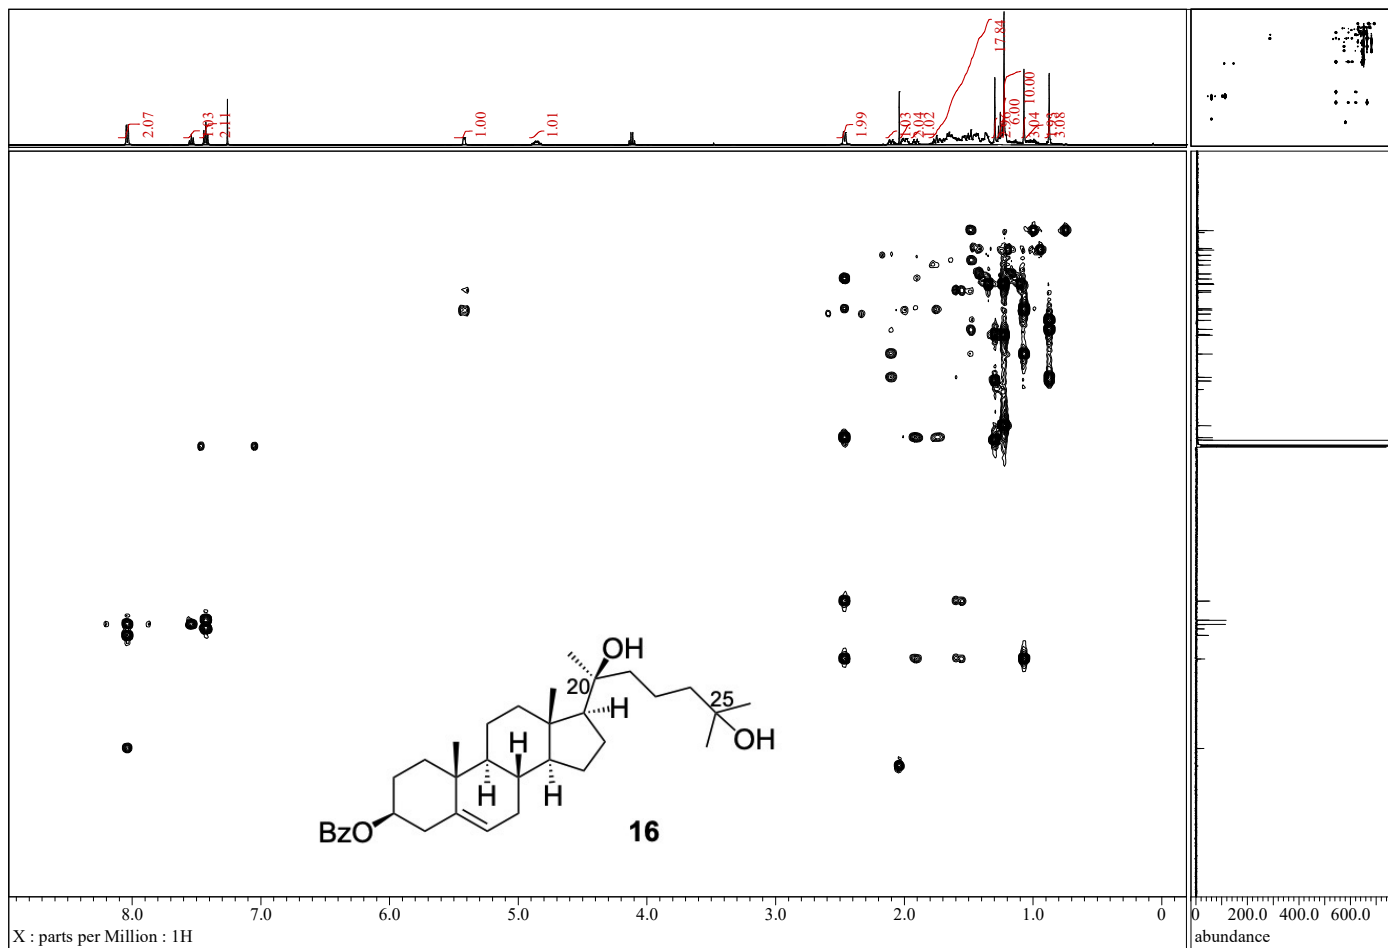

X\_Domain = 1H  
 Experiment= zg30  
 X\_Freq = 500.17[MHz]  
 X\_Offset = 3.08855[kHz]  
 X\_Sweep = 9.99994[kHz]  
 X\_Points = 32768  
 Scans = 128  
 Temp\_Get = 300.0117[K]  
 Solvent = CHLOROFORM-D

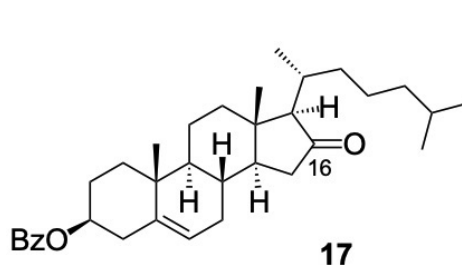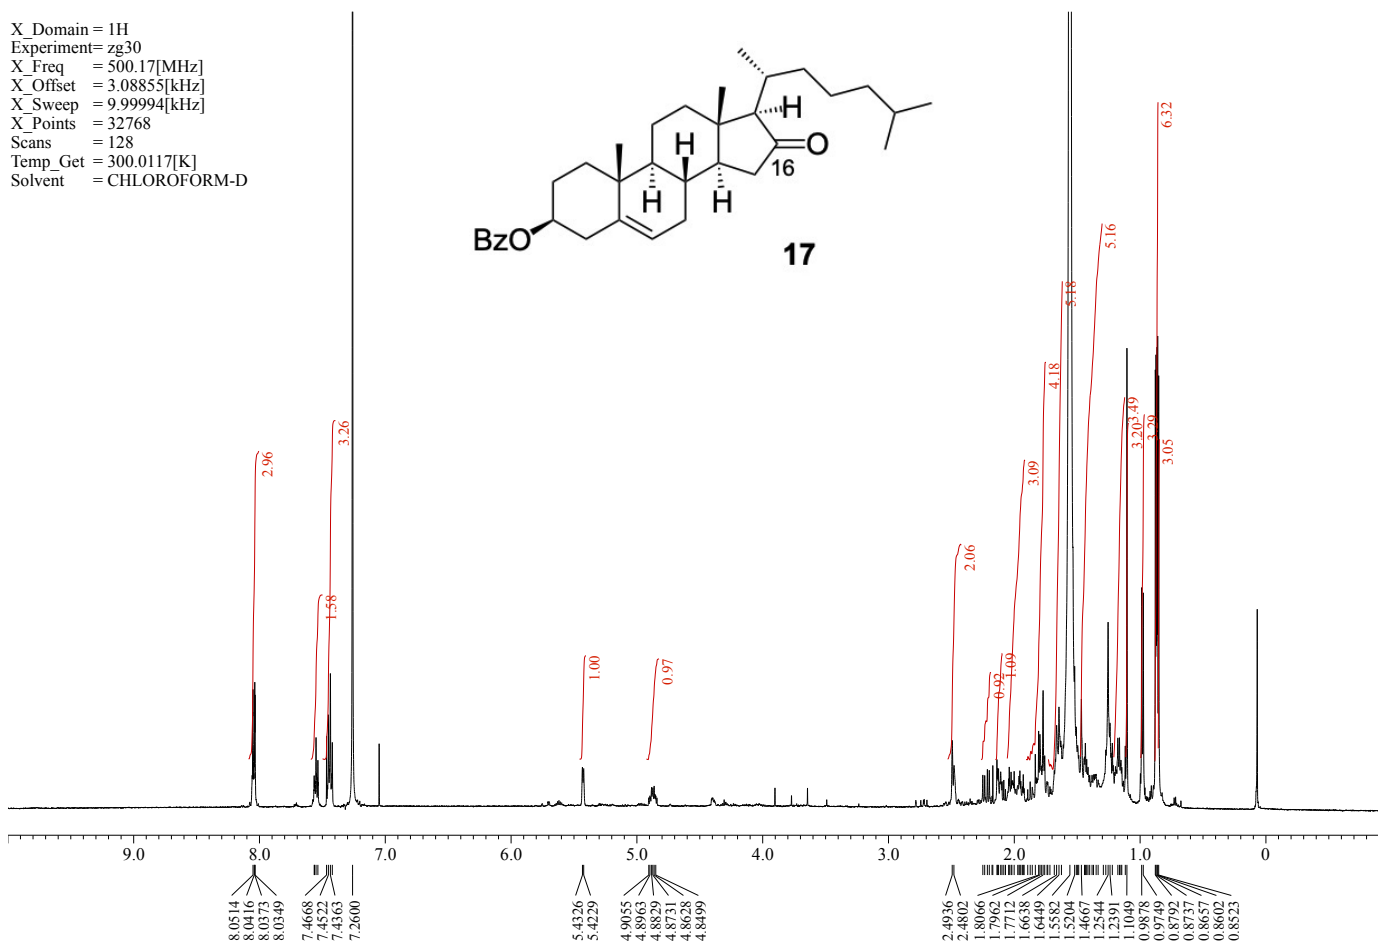

X\_Domain = 13C  
 Experiment= zgpg30  
 X\_Freq = 125.76785[MHz]  
 X\_Offset = 12.57628[kHz]  
 X\_Sweep = 29.75893[kHz]  
 X\_Points = 32768  
 Scans = 10000  
 Temp\_Get = 300.0083[K]  
 Solvent = CHLOROFORM-D

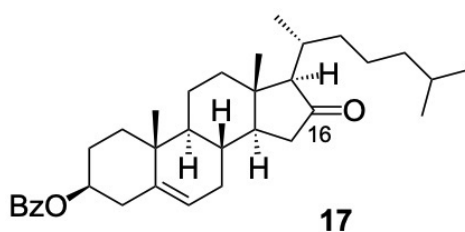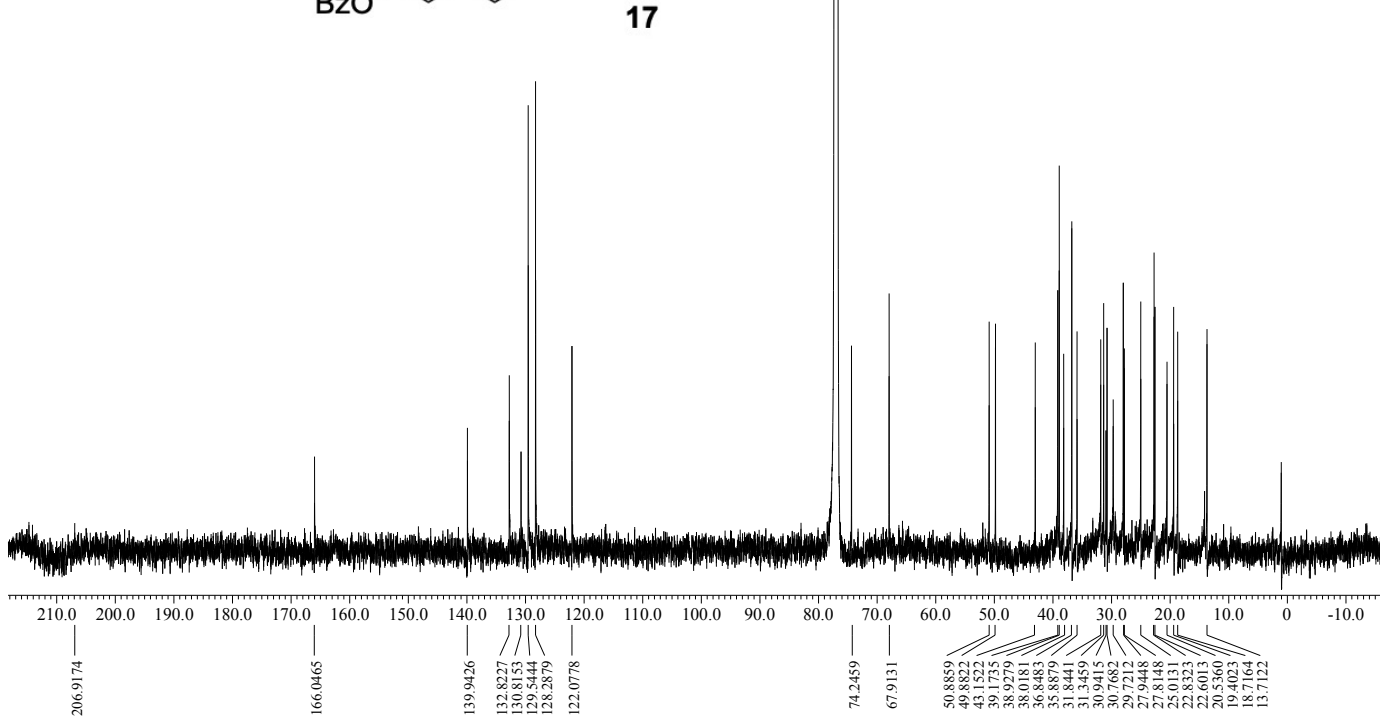

X\_Domain = 1H  
 Experiment= zg30  
 X\_Freq = 500.17[MHz]  
 X\_Offset = 3.08855[kHz]  
 X\_Sweep = 9.99994[kHz]  
 X\_Points = 32768  
 Scans = 16  
 Temp\_Get = 300.0049[K]  
 Solvent = CHLOROFORM-D

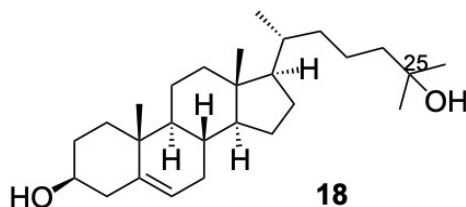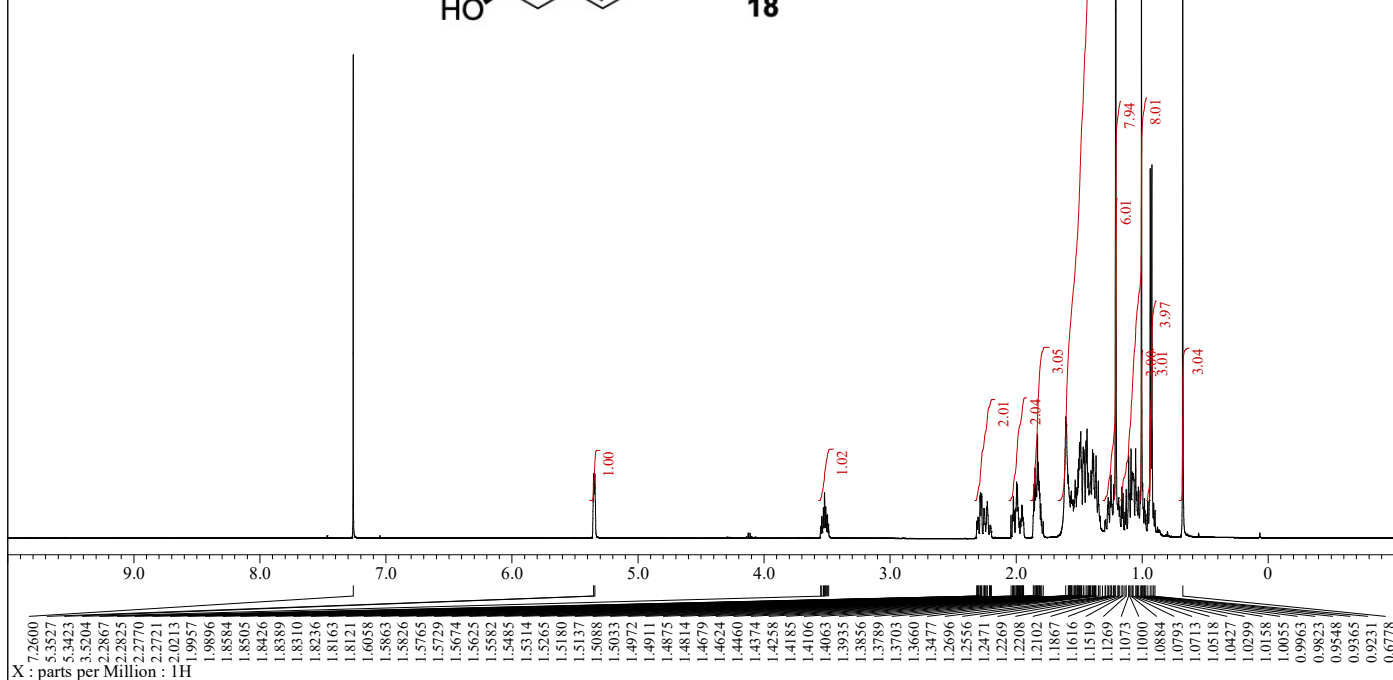



X\_Domain = 13C  
 Experiment = zgpg30  
 X\_Freq = 125.76785[MHz]  
 X\_Offset = 12.57632[kHz]  
 X\_Sweep = 29.75893[kHz]  
 X\_Points = 32768  
 Scans = 90  
 Temp\_Get = 300.0092[K]  
 Solvent = CHLOROFORM-D

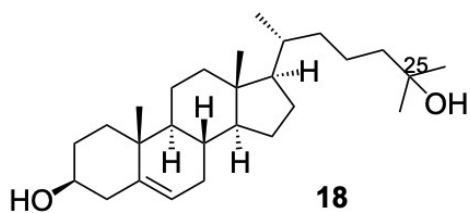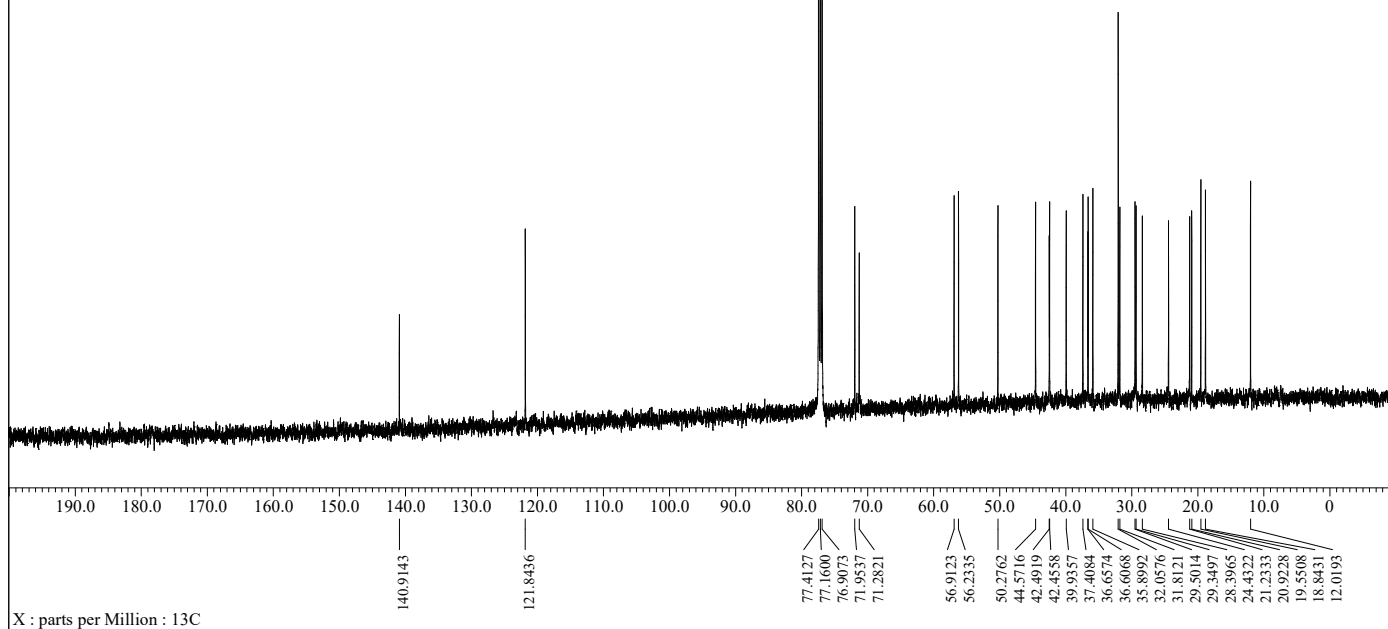

X\_Domain = 1H  
 Experiment = s2pul  
 X\_Freq = 499.72511[MHz]  
 X\_Offset = 2.99838[kHz]  
 X\_Sweep = 7.9952[kHz]  
 Scans = 64  
 Temp\_Get = 29[dC]  
 Solvent = cdcl3

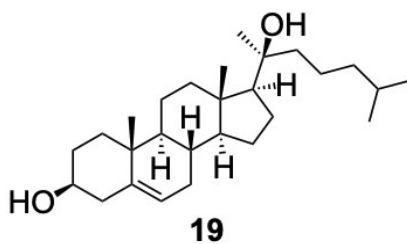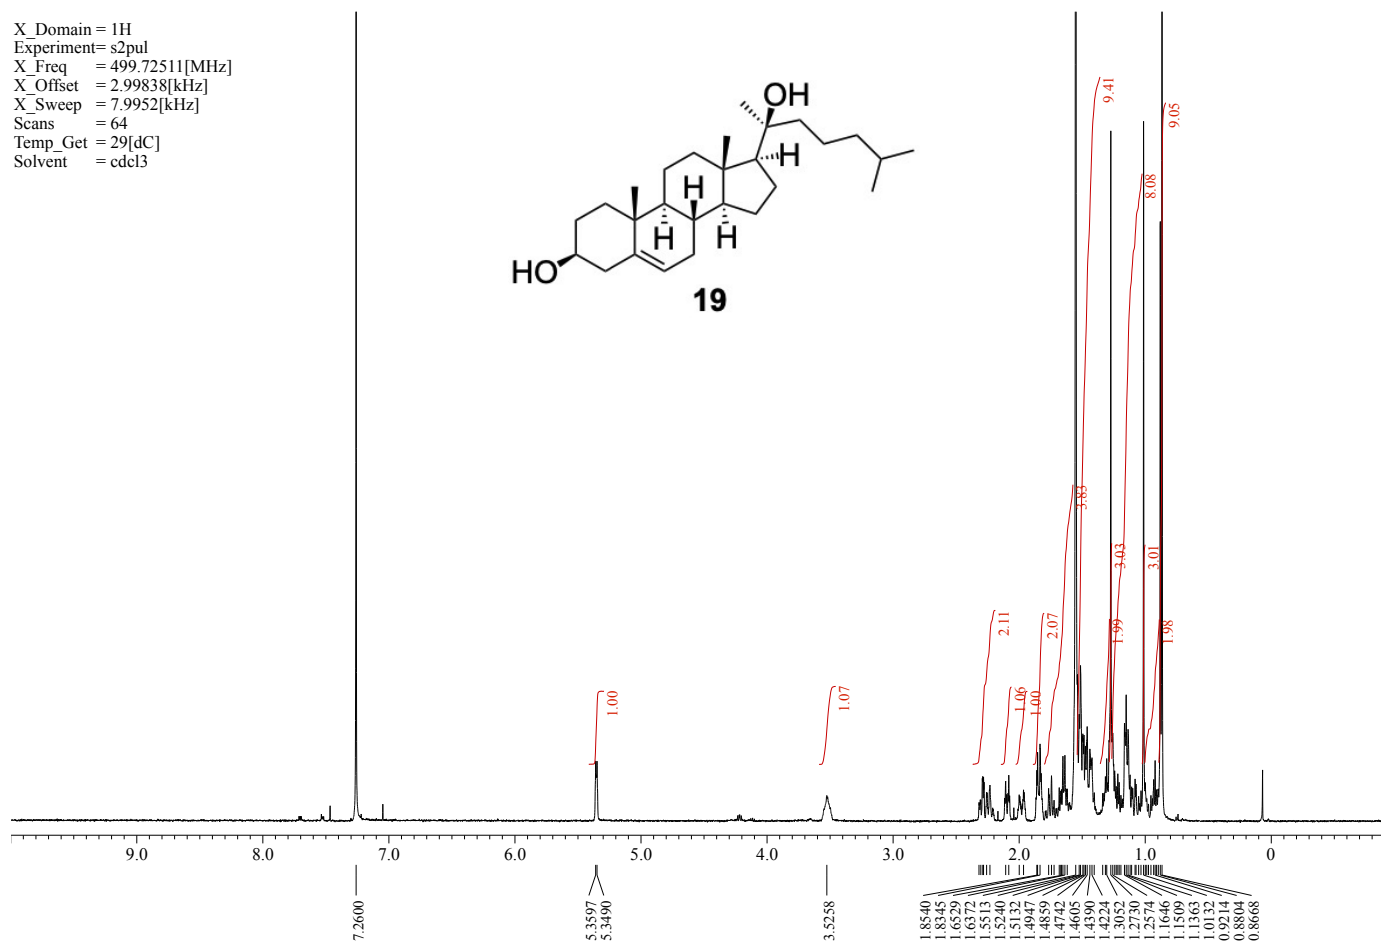

main = 13C  
 ment = zgpg30  
 q = 125.76785[MHz]  
 set = 12.57573[kHz]  
 sep = 29.75893[kHz]  
 nts = 32768  
 = 400  
 \_Get = 300.0063[K]  
 it = CHLOROFORM-D

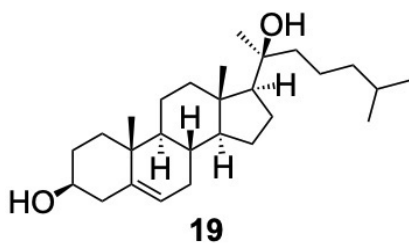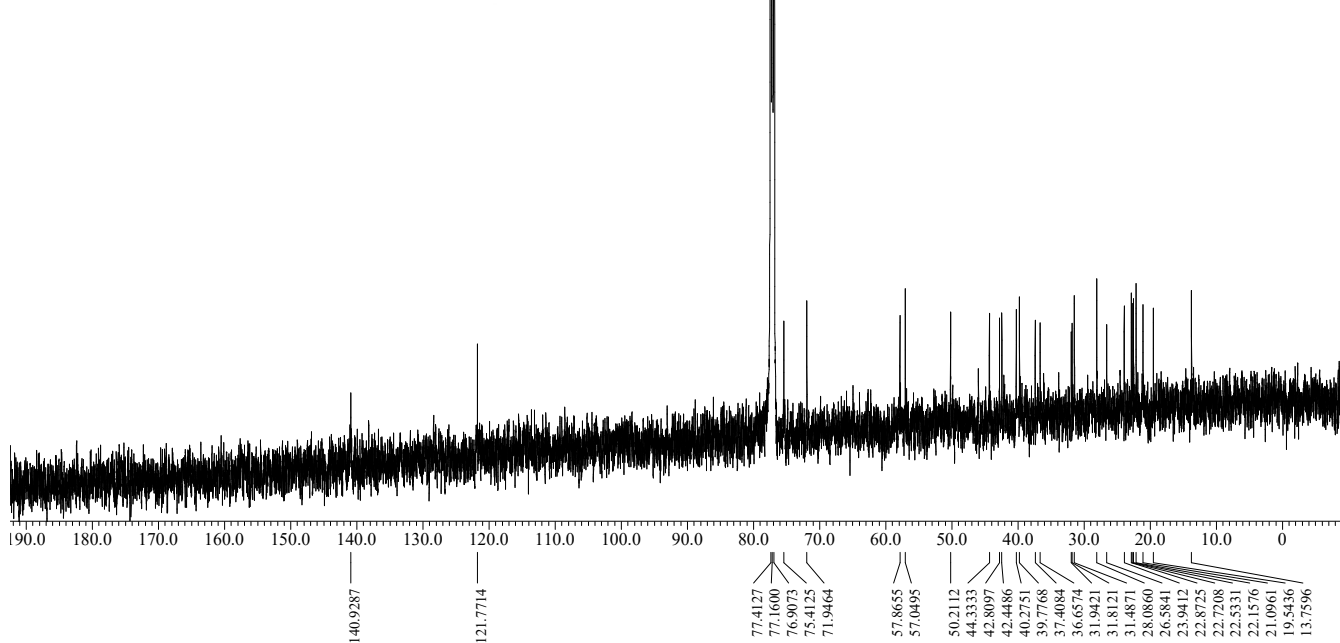

rts per Million : 13C

X\_Domain = 1H  
 Experiment = zg30  
 X\_Freq = 500.17[MHz]  
 X\_Offset = 3.08875[kHz]  
 X\_Sweep = 9.99994[kHz]  
 X\_Points = 32768  
 Scans = 16  
 Temp\_Get = 300.007[K]  
 Solvent = CHLOROFORM-D

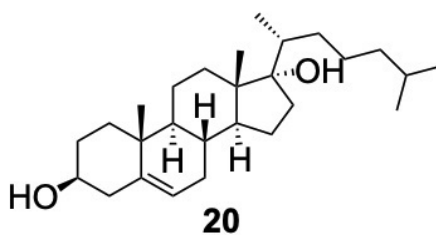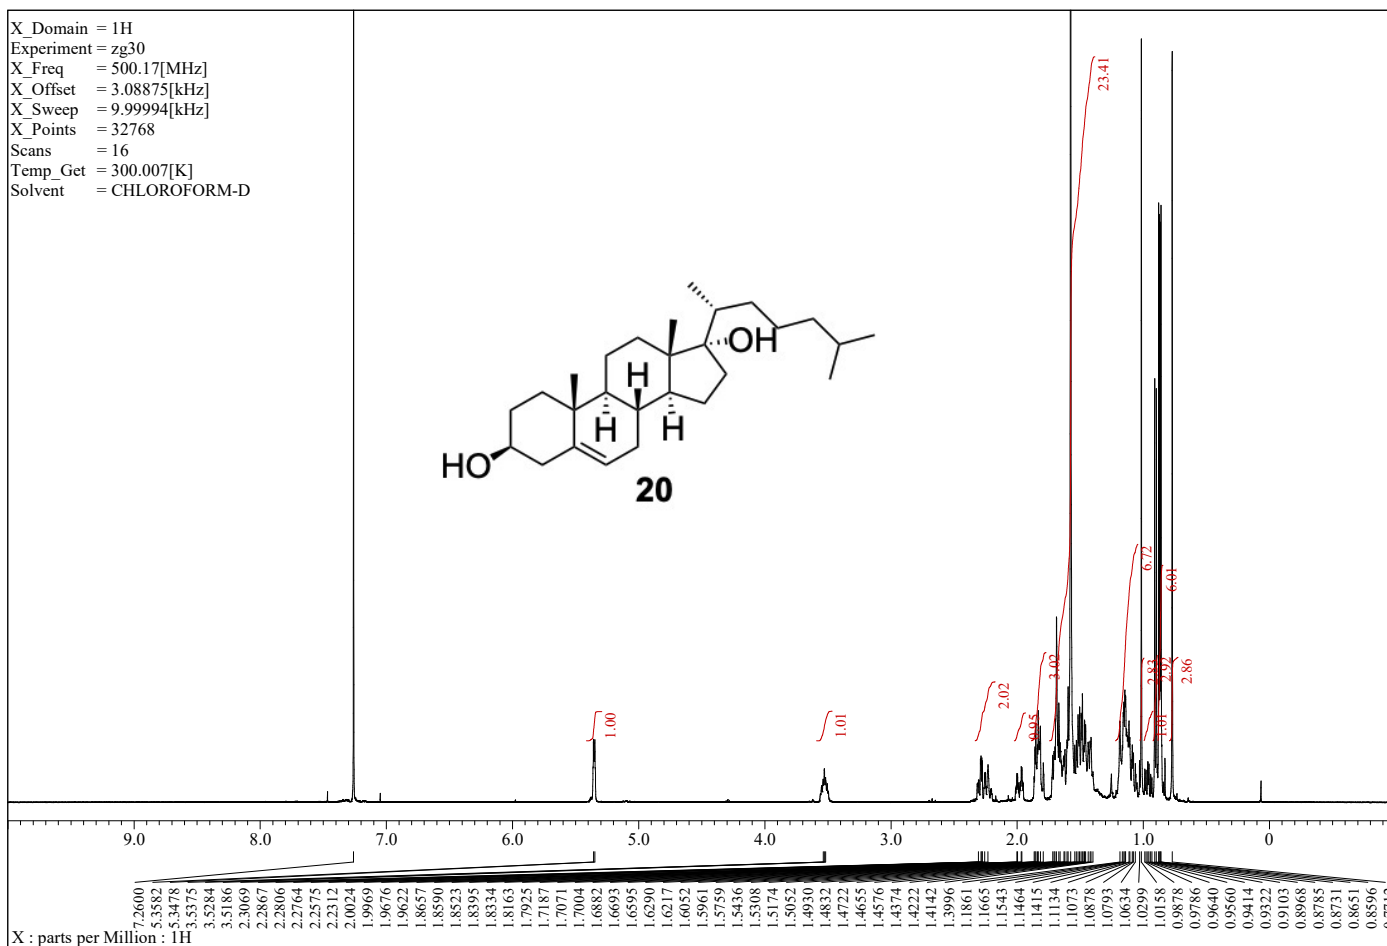

X : parts per Million : 1H

X\_Domain = 13C  
 Experiment = zgpg30  
 X\_Freq = 125.76785[MHz]  
 X\_Offset = 12.57573[kHz]  
 X\_Sweep = 29.75893[kHz]  
 X\_Points = 32768  
 Scans = 44  
 Temp\_Get = 300.0143[K]  
 Solvent = CHLOROFORM-D

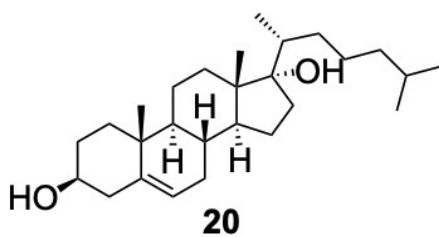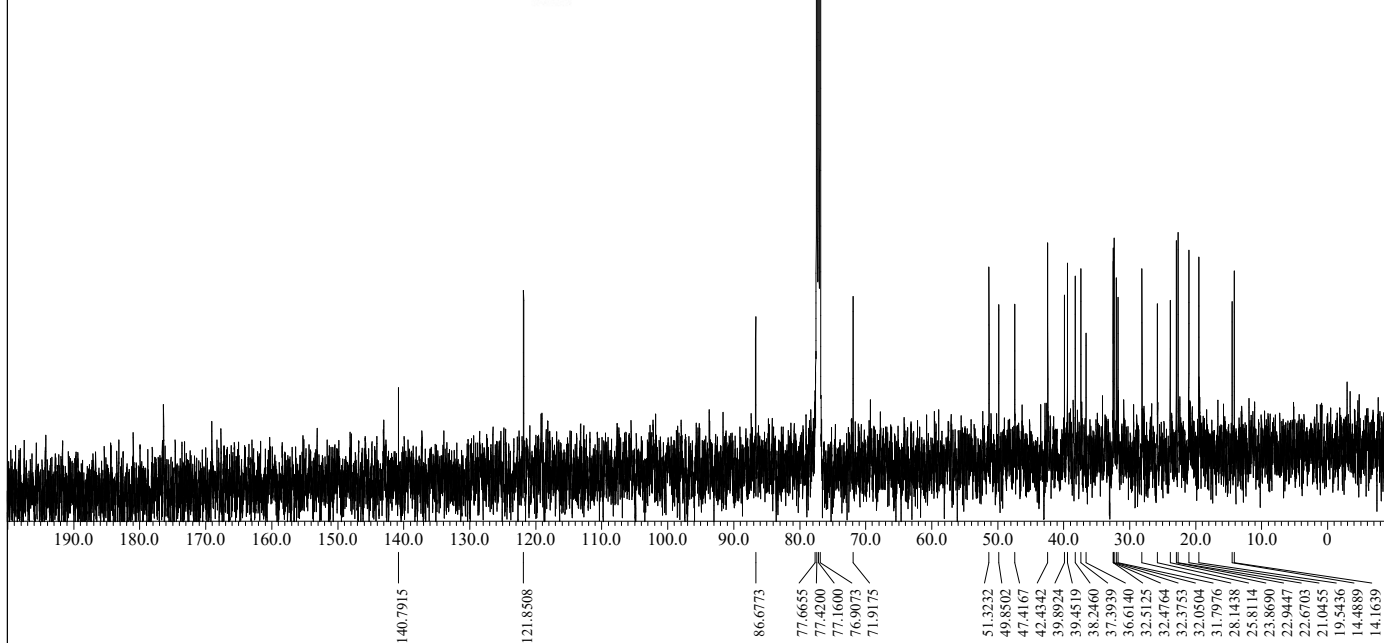

X\_Domain = 1H  
 Experiment = s2pul  
 X\_Freq = 499.72511[MHz]  
 X\_Offset = 2.99838[kHz]  
 X\_Sweep = 7.9952[kHz]  
 Scans = 8  
 Temp\_Get = 29[dC]  
 Solvent = cdcl3

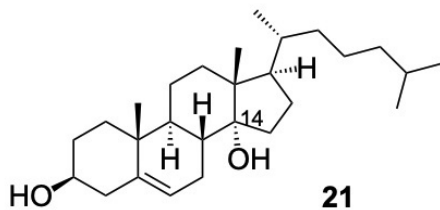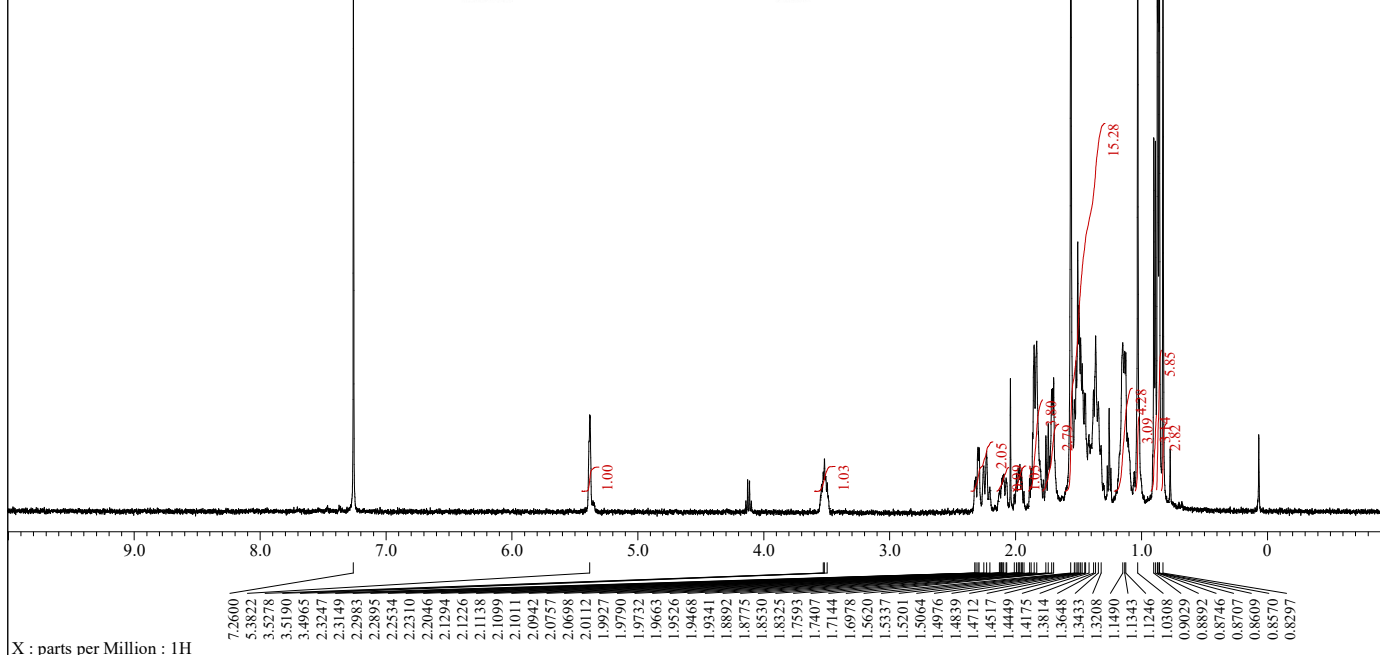

X\_Domain = 13C  
 Experiment = zgpg30  
 X\_Freq = 125.76785[MHz]  
 X\_Offset = 12.57628[kHz]  
 X\_Sweep = 29.75893[kHz]  
 X\_Points = 32768  
 Scans = 256  
 Temp\_Get = 300.0139[K]  
 Solvent = CHLOROFORM-D

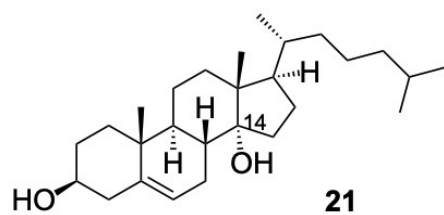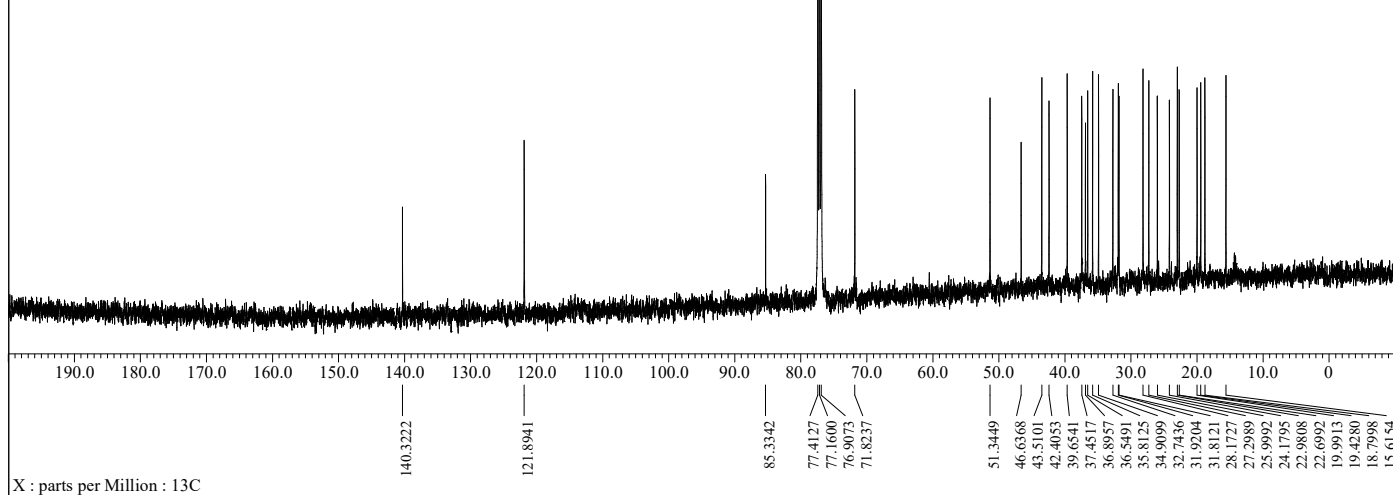

X\_Domain = 1H  
 Experiment = s2pul  
 X\_Freq = 499.72511[MHz]  
 X\_Offset = 2.99838[kHz]  
 X\_Sweep = 7.996[kHz]  
 Scans = 8  
 Temp\_Get = 29[dC]  
 Solvent = cdcl3

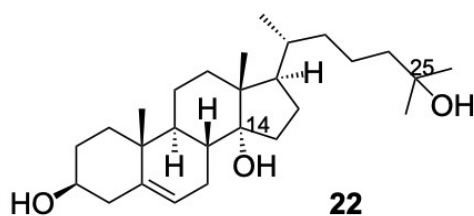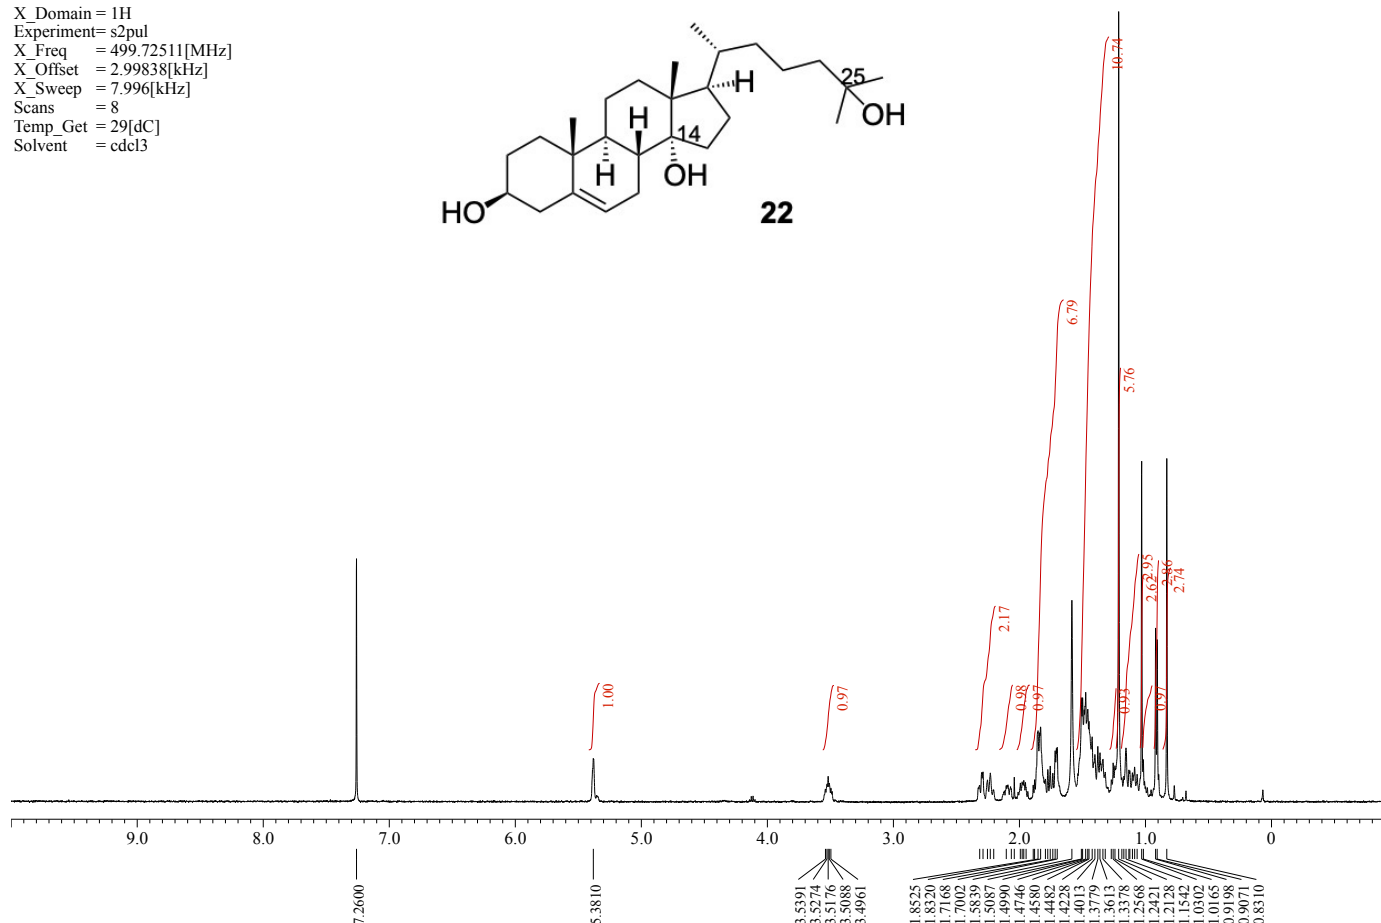

X\_Domain = 13C  
 Experiment = zgpg30  
 X\_Freq = 125.76785[MHz]  
 X\_Offset = 12.57628[kHz]  
 X\_Sweep = 29.75893[kHz]  
 X\_Points = 32768  
 Scans = 256  
 Temp\_Get = 300.0078[K]  
 Solvent = CHLOROFORM-D

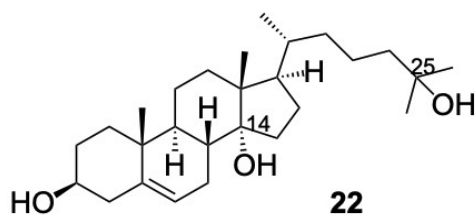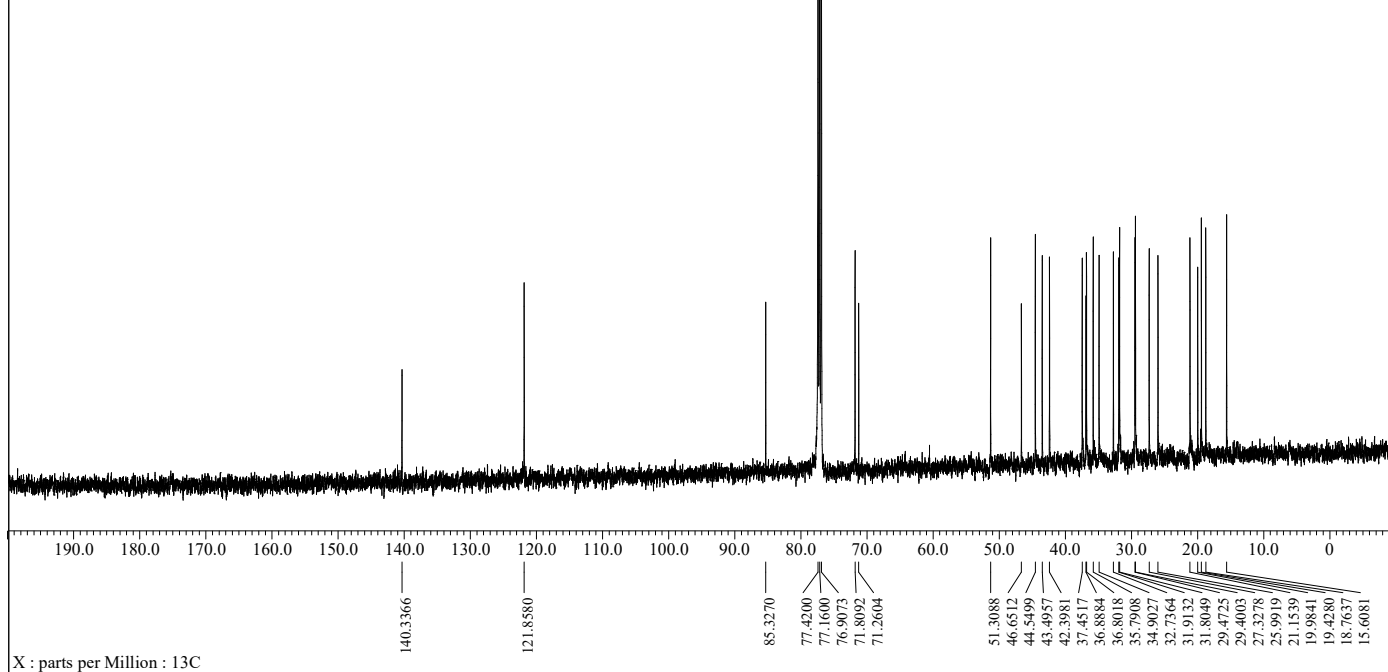

X\_Domain = 1H  
 Experiment = s2pul  
 X\_Freq = 499.72511[MHz]  
 X\_Offset = 2.99838[kHz]  
 X\_Sweep = 7.9952[kHz]  
 Scans = 16  
 Temp\_Get = 29[dC]  
 Solvent = cdcl3

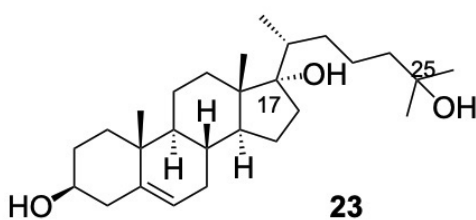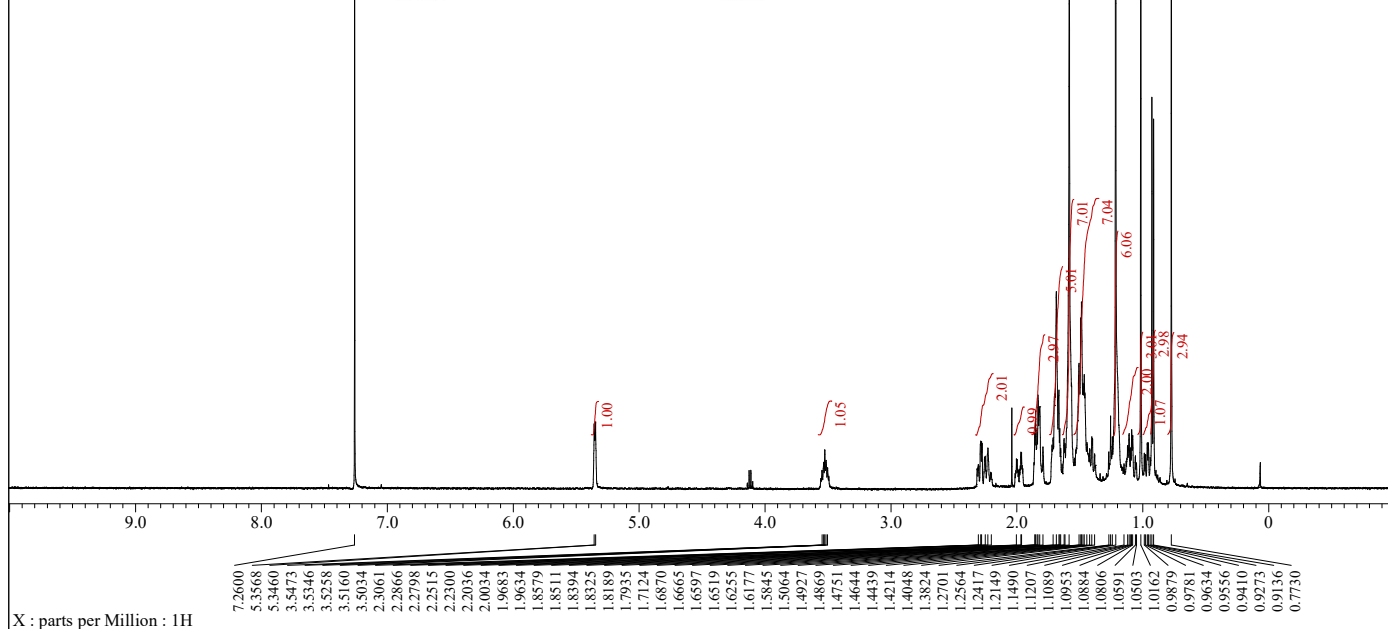

X\_Domain = 13C  
 Experiment = zgpg30  
 X\_Freq = 125.76785[MHz]  
 X\_Offset = 12.57632[kHz]  
 X\_Sweep = 29.75893[kHz]  
 X\_Points = 32768  
 Scans = 1024  
 Temp\_Get = 299.9956[K]  
 Solvent = CHLOROFORM-D

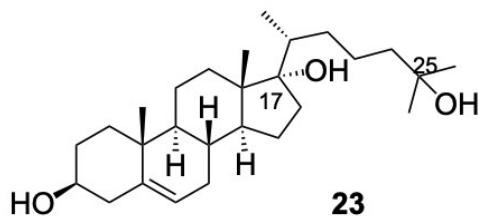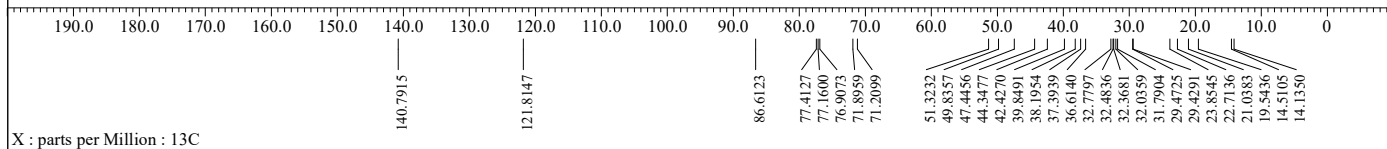

X\_Domain = 1H  
 Experiment = s2pul  
 X\_Freq = 499.72511[MHz]  
 X\_Offset = 2.99838[kHz]  
 X\_Sweep = 7.9952[kHz]  
 Scans = 16  
 Temp\_Get = 29[dC]  
 Solvent = cdcl3

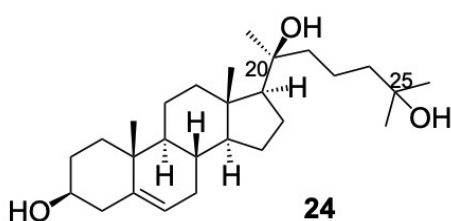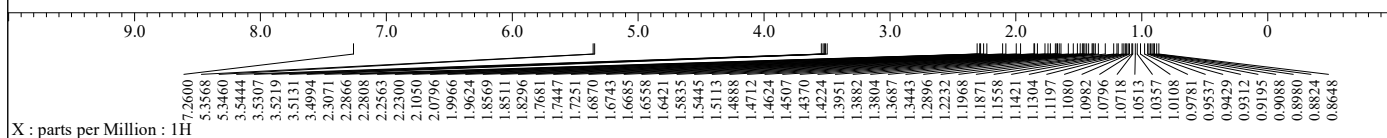

X\_Domain = 13C  
 Experiment = zgpg30  
 X\_Freq = 125.76785[MHz]  
 X\_Offset = 12.57632[kHz]  
 X\_Sweep = 29.75893[kHz]  
 X\_Points = 32768  
 Scans = 1024  
 Temp\_Get = 300.0071[K]  
 Solvent = CHLOROFORM-D

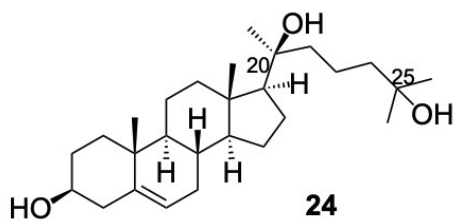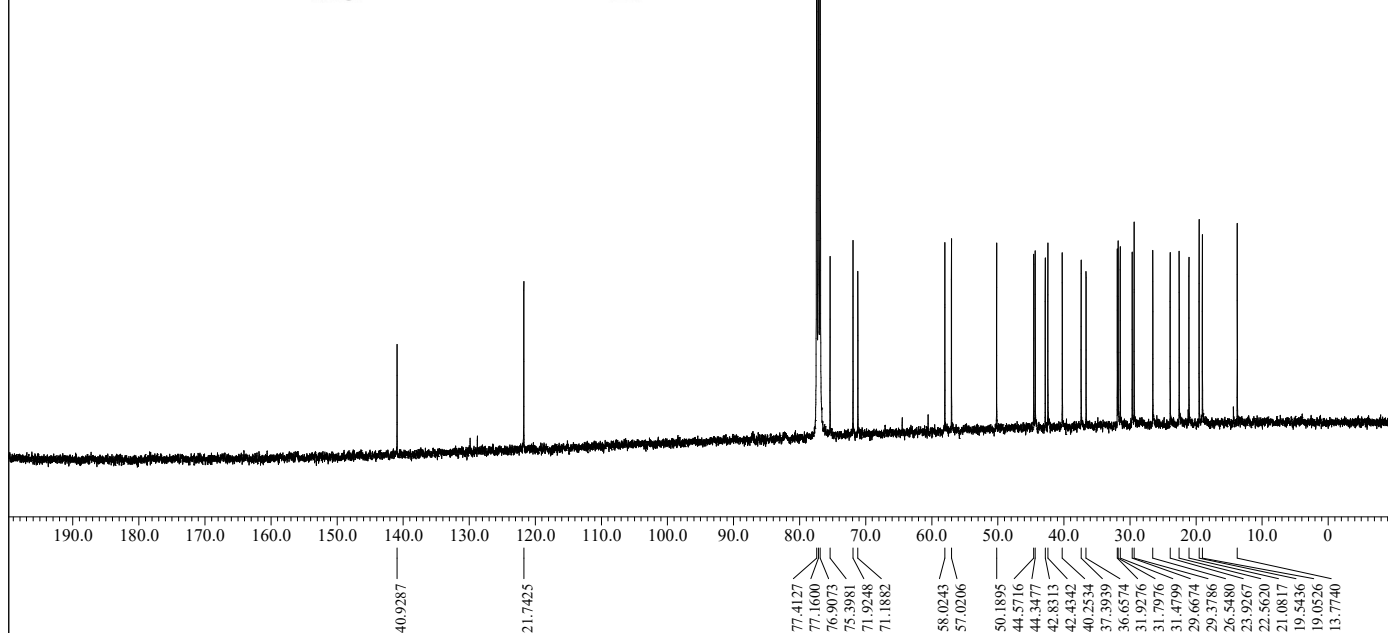

X : parts per Million : 13C
